# Supplementary material for: Comparative brain-wide mapping of ketamine- and isoflurane-activated nuclei and functional networks in the mouse brain
Source: eLife. 2024 Mar 21;12:RP88420. doi: 10.7554/eLife.88420 (PMC10957177; doi:10.7554/eLife.88420)
Supplement: Figure 2—source data 1. [file elife-88420-fig2-data1.xlsx]

## Sheet: Figure 2
Figure 2—source data 1. Z-scores of c-Fos expression in each brain region following KET and ISO treatments.
Name	Label	Group	ID	GroupID	Volume	Color_1	Color_2	Color_3	ISO_1	ISO_2	ISO_3	ISO_4	ISO_5	ISO_6	Ket_1	Ket_2	Ket_3	Ket_4	Ket_5	Ket_6	ISONormTest	ISOtTestP	ISOtTestPAdj	ISOWilcoxonP	ISOWilcoxonPAdj	KetNormTest	KettTestP	KettTestPAdj	KetWilcoxonP	KetWilcoxonPAdj
PA	Posterior amygdalar nucleus	CTX	369	1	0.965953	151	236	147	3.65585	0.331212	3.88399	2.69973	3.24381	5.06825	4.05682	0.842072	0.442166	3.63098	2.29995	3.79299	0	0.00467338	0.0191704	0.03125	0.104688	0	0.0113425	0.0217127	0.03125	0.0479485
PIR	Piriform area	CTX	311	1	11.5657	106	203	186	3.51319	1.04671	3.92507	1.10627	3.41037	1.71412	7.22536	5.38979	4.79134	5.60114	4.46175	7.04242	0	0.00586379	0.0231102	0.03125	0.104688	0	6.32738e-05	0.000704291	0.03125	0.0479485
DG	Dentate gyrus	CTX	329	1	6.59745	126	208	75	1.36672	-0.215681	0.996303	0.923398	1.78912	1.56457	7.97262	2.82989	2.96258	6.77638	3.02175	5.30771	0	0.014185	0.0496754	0.0625	0.155093	0	0.0031697	0.00904691	0.03125	0.0479485
ENT	Entorhinal area	CTX	336	1	11.4094	50	184	37	2.26841	1.86402	2.80314	0.759644	1.82675	1.2984	5.17599	3.56639	3.77234	4.91299	3.41156	4.74639	0	0.00163071	0.00799444	0.03125	0.104688	0	3.82492e-05	0.000704291	0.03125	0.0479485
MOB	Main olfactory bulb	CTX	301	1	16.4632	154	210	189	1.75591	-1.35475	2.2425	1.83664	2.66565	1.84736	2.66336	2.38381	2.29439	1.22569	1.43425	1.61491	1	0.0512194	0.123341	0.0625	0.155093	0	0.000467223	0.00243415	0.03125	0.0479485
CA	Ammons horn	CTX	325	1	16.9484	126	208	75	1.20902	-0.862755	0.354942	0.438032	1.66132	0.939349	6.16896	2.61398	2.14983	6.08351	2.77556	4.56273	0	0.141735	0.256656	0.15625	0.275493	0	0.00265866	0.00834986	0.03125	0.0479485
AON	Anterior olfactory nucleus	CTX	306	1	4.8697	84	191	148	2.46769	0.644566	3.0695	0.415366	3.12299	1.01434	2.58418	2.29149	2.15621	2.08468	1.86653	2.15268	0	0.0166196	0.0566192	0.03125	0.104688	0	3.22024e-06	0.000323635	0.03125	0.0479485
TT	Taenia tecta	CTX	307	1	1.44423	98	208	159	4.11197	2.49188	4.49392	2.12311	3.89045	1.95629	2.56457	2.55463	2.46647	2.63021	1.64329	2.20529	0	0.000918261	0.00498839	0.03125	0.104688	1	2.13343e-05	0.000704291	0.03125	0.0479485
ECT	Ectorhinal area	CTX	294	1	1.71188	13	159	145	2.13012	-0.252287	2.52667	0.717283	2.07351	1.16476	3.23728	2.70412	2.87619	3.17588	2.29704	2.93824	0	0.0226458	0.0700277	0.0625	0.155093	0	5.11857e-06	0.000342944	0.03125	0.0479485
RSP	Retrosplenial area	CTX	247	1	10.501	26	166	152	0.761879	-0.435642	1.13402	0.189686	1.07402	1.19827	3.61828	2.34488	2.0954	3.53035	2.68246	3.45159	0	0.057195	0.132097	0.09375	0.200465	0	0.000112908	0.0009456	0.03125	0.0479485
ILA	Infralimbic area	CTX	203	1	0.843172	89	179	99	4.72767	3.17545	5.83751	3.73565	5.30433	4.02951	2.77997	2.45708	2.58565	2.86563	1.64412	2.02791	0	0.000112934	0.00137552	0.03125	0.104688	0	5.92482e-05	0.000704291	0.03125	0.0479485
SUB	Subiculum	CTX	352	1	2.10358	79	194	68	1.98493	1.03888	1.98493	0.67221	1.21901	0.505766	4.44737	3.3977	3.31169	4.08104	2.0828	3.91248	0	0.00503226	0.0202297	0.03125	0.104688	0	0.00013935	0.00103738	0.03125	0.0479485
TEa	Temporal association areas	CTX	281	1	3.10627	21	176	179	1.94236	-0.366339	2.43099	0.603541	2.1294	1.00716	3.50664	2.38915	2.23918	3.35367	2.15203	3.33812	0	0.0316917	0.0923194	0.0625	0.155093	0	0.000109098	0.0009456	0.03125	0.0479485
COA	Cortical amygdalar area	CTX	316	1	3.26505	97	231	183	1.86158	0.117378	2.38942	1.61274	3.22014	1.83646	9.67455	2.50462	1.85913	9.33688	3.96937	7.71724	0	0.00697259	0.0264432	0.03125	0.104688	0	0.00935016	0.0186078	0.03125	0.0479485
ORB	Orbital area	CTX	209	1	5.90188	36	138	94	1.70776	0.45614	2.47771	1.35969	2.41452	1.86912	3.63737	2.39071	2.38718	3.44268	2.41749	2.97764	0	0.00249823	0.0116778	0.03125	0.104688	0	5.88716e-05	0.000704291	0.03125	0.0479485
SS	Somatosensory areas	CTX	26	1	33.3322	24	128	100	-0.417635	-1.18823	-2.35409	-1.18823	1.69973	1.36212	10.4288	6.72819	5.96305	9.55832	7.44905	9.69497	0	0.614021	0.796246	0.8125	1.0207	0	0.000102363	0.000935225	0.03125	0.0479485
MO	Somatomotor areas	CTX	13	1	24.4574	31	157	90	-0.178919	-1.07322	0.757606	-1.07322	1.3571	2.07986	4.88216	3.5571	3.28106	4.73886	3.42927	4.26666	0	0.58367	0.766782	0.65625	0.856534	0	3.17869e-05	0.000704291	0.03125	0.0479485
VIS	Visual areas	CTX	127	1	13.4591	8	133	140	0.801618	-1.05576	0.384681	0.674335	1.0412	0.650493	3.50701	2.6083	2.38852	3.32033	2.23954	3.48827	1	0.233376	0.378295	0.4375	0.632644	0	6.05043e-05	0.000704291	0.03125	0.0479485
PERI	Perirhinal area	CTX	288	1	0.790078	14	150	132	2.26019	1.46336	2.72202	1.41296	2.59081	1.5113	3.77794	3.20226	2.85048	3.47534	2.91687	3.38976	0	0.000460335	0.00308425	0.03125	0.104688	0	3.05652e-06	0.000323635	0.03125	0.0479485
AUD	Auditory areas	CTX	98	1	5.80086	1	147	153	1.76059	0.3642	2.15772	-0.0846384	1.76059	-0.0846384	4.11114	3.02256	2.69227	4.20985	2.52408	3.66525	0	0.0663975	0.145064	0.15625	0.275493	0	9.21301e-05	0.000881817	0.03125	0.0479485
AOB	Accessory olfactory bulb	CTX	302	1	0.651531	157	240	210	-0.818532	-0.818532	1.75594	1.15032	3.33303	1.45797	3.0847	3.1105	3.20824	1.88428	1.09667	2.16282	0	0.183557	0.312669	0.15625	0.275493	0	0.000943407	0.00403457	0.03125	0.0479485
BMAp	Basomedial amygdalar nucleus, posterior part	CTX	368	1	0.717328	132	234	129	1.74612	1.20683	0.635904	1.29771	3.37592	2.27372	5.79332	2.11292	0.87204	5.22093	1.27304	5.18065	0	0.00666348	0.0257569	0.03125	0.104688	0	0.0132893	0.0240644	0.03125	0.0479485
TR	Postpiriform transition area	CTX	322	1	1.39856	168	236	211	1.53695	-1.52627	1.15795	-0.397236	1.45743	-1.52627	4.66335	1.64836	1.05157	4.08006	2.14606	3.95736	0	0.851331	1.01253	0.9375	1.11501	0	0.00491343	0.0119099	0.03125	0.0479485
PL	Prelimbic area	CTX	197	1	2.40823	47	168	80	3.16579	-0.845621	3.62422	-0.271543	3.39589	2.18439	3.64106	2.61205	2.32608	3.29793	2.22574	2.58434	0	0.0657382	0.145064	0.15625	0.275493	0	6.85593e-05	0.000704291	0.03125	0.0479485
ACA	Anterior cingulate area	CTX	184	1	5.53983	64	166	102	1.6306	0.333712	1.26764	-1.71445	1.9334	2.26859	2.94052	2.14611	2.02207	2.99947	2.07548	2.73102	0	0.172146	0.298288	0.21875	0.363378	0	4.11436e-05	0.000704291	0.03125	0.0479485
LA	Lateral amygdalar nucleus	CTX	361	1	0.83875	144	235	141	2.24331	-1.7645	-0.296287	-0.0599566	1.87241	1.29667	4.88721	1.2923	1.10816	4.2801	2.2849	1.89229	0	0.418379	0.604994	0.5625	0.743832	0	0.00981225	0.0193359	0.03125	0.0479485
DP	Dorsal peduncular area	CTX	310	1	0.501812	164	218	164	3.5924	3.84498	5.97007	3.5924	4.16679	3.45112	3.75774	2.99207	3.4069	4.47262	2.48325	3.12191	1	0.000129762	0.00137552	0.03125	0.104688	0	7.00787e-05	0.000704291	0.03125	0.0479485
PAA	Piriform-amygdalar area	CTX	321	1	1.19125	89	218	171	2.51594	-1.67114	4.05989	2.89193	4.70523	1.34798	6.95101	1.73158	1.1072	5.70545	2.71022	5.52799	0	0.0557281	0.131781	0.09375	0.200465	0	0.0101703	0.0198469	0.03125	0.0479485
POST	Postsubiculum	CTX	350	1	1.08038	72	200	60	0.111399	0.418087	-0.938796	0.828268	0.734891	0.563693	4.88009	1.52116	1.73915	4.54311	2.11658	4.72845	0	0.330819	0.492553	0.4375	0.632644	1	0.00435643	0.011372	0.03125	0.0479485
AI	Agranular insular area	CTX	228	1	7.89742	33	152	102	1.29428	-1.20407	0.740612	0.740612	2.83612	3.32522	4.13463	2.35065	2.20396	3.58111	2.40202	3.62562	0	0.111275	0.21506	0.15625	0.275493	0	0.000276863	0.00173905	0.03125	0.0479485
BMAa	Basomedial amygdalar nucleus, anterior part	CTX	367	1	0.768109	132	234	129	2.07757	1.32568	-0.559686	2.39906	2.39906	1.32568	3.89779	-0.921331	0.109113	3.987	2.62771	2.90665	0	0.0221103	0.0694403	0.0625	0.155093	0	0.0530092	0.0674358	0.09375	0.108923
PAR	Parasubiculum	CTX	349	1	0.932656	114	213	105	3.31999	1.28042	2.75835	0.860515	1.0916	-0.575143	6.18243	2.48751	3.69195	6.04052	2.27591	6.09416	0	0.0515455	0.123341	0.0625	0.155093	0	0.00204926	0.00686501	0.03125	0.0479485
NLOT	Nucleus of the lateral olfactory tract	CTX	312	1	0.318672	149	228	200	3.17767	-0.339627	1.86223	0.158641	2.48997	1.19987	5.64595	0.0538731	0.924367	3.69764	2.12435	4.697	0	0.0495691	0.123005	0.09375	0.200465	0	0.0241444	0.0382129	0.03125	0.0479485
PRE	Presubiculum	CTX	351	1	0.923969	89	185	71	8.05495	0.900235	5.6452	2.48189	2.48189	4.33231	6.88602	2.32255	3.80616	6.31409	2.8224	5.45968	0	0.0130187	0.0467278	0.03125	0.104688	0	0.00190099	0.00670348	0.03125	0.0479485
PTLp	Posterior parietal association areas	CTX	266	1	2.454	0	159	172	0.600034	-1.85427	0.14713	-1.08002	1.37428	-1.85427	2.10259	3.21423	3.02011	2.14935	-0.286534	0.699346	0	0.456915	0.647862	0.53125	0.741536	0	0.0222334	0.0360397	0.0625	0.0800159
GU	Gustatory areas	CTX	84	1	1.76869	0	156	117	1.14455	0.706609	0.0893649	0.0893649	3.66889	3.15667	6.27326	4.01869	3.4434	5.41432	3.88948	5.63509	0	0.0683735	0.146206	0.03125	0.104688	0	0.000151887	0.00109033	0.03125	0.0479485
CLA	Claustrum	CTX	357	1	0.551297	138	218	135	1.33027	-0.822551	2.19932	0.253861	3.27573	2.19932	3.66351	2.49648	2.36654	3.09169	2.52687	3.62006	0	0.068375	0.146206	0.09375	0.200465	0	5.9776e-05	0.000704291	0.03125	0.0479485
FRP	Frontal pole, cerebral cortex	CTX	7	1	0.972297	38	143	69	-0.707107	-0.707107	5.42943	-0.707107	1.9697	-0.707107	3.29514	2.61108	2.19876	1.74822	0.948173	-0.841011	1	0.493105	0.674245	1	1.12291	0	0.0385473	0.0538055	0.0625	0.0800159
IG	Induseum griseum	CTX	334	1	0.124344	126	208	75	NaN	NaN	NaN	NaN	NaN	NaN	5.63072	2.67092	1.71226	7.18836	2.67092	5.45762	NaN	NaN	NaN	NaN	NaN	0	0.00497899	0.0119099	0.03125	0.0479485
VISC	Visceral area	CTX	91	1	2.35342	17	173	131	-0.950658	-0.950658	-0.950658	-0.950658	1.57114	1.57114	5.63352	2.96029	1.76136	4.82582	3.60285	4.93329	1	0.844163	1.01253	0.8125	1.0207	0	0.00112462	0.00461325	0.03125	0.0479485
FC	Fasciola cinerea	CTX	333	1	0.0616719	126	208	75	NaN	NaN	NaN	NaN	NaN	NaN	5.28284	0.704763	5.28284	6.17732	1.45177	2.39289	NaN	NaN	NaN	NaN	NaN	0	0.0131781	0.0240644	0.03125	0.0479485
BST	Bed nuclei of the stria terminalis	CNU	407	2	1.3405	179	192	223	3.59648	2.57819	3.27288	2.77255	3.5027	3.80688	2.75808	1.47402	0.895524	2.93377	1.08976	2.04544	0	1.51225e-05	0.000337737	0.03125	0.104688	0	0.00309395	0.00901281	0.03125	0.0479485
CEA	Central amygdalar nucleus	CNU	388	2	1.3177	128	192	226	3.43214	2.79396	3.52531	3.64578	3.83691	4.00615	6.29801	-0.833263	-1.67812	5.02901	2.72688	4.01115	0	4.97751e-06	0.000152636	0.03125	0.104688	0	0.10522	0.119487	0.15625	0.168851
LSr	Lateral septal nucleus, rostral (rostroventral) part	CNU	381	2	1.88098	144	203	237	3.56347	2.29348	3.80548	3.2317	3.33597	3.85899	1.83553	1.2595	1.25734	1.70133	0.940464	1.50936	0	3.00441e-05	0.000560982	0.03125	0.104688	0	0.000132477	0.00102415	0.03125	0.0479485
SI	Substantia innominata	CNU	399	2	3.02784	162	177	216	2.85934	1.58241	2.59836	1.86891	2.73336	2.68734	6.72565	4.11326	4.368	5.77813	3.45078	5.81395	0	0.00010431	0.00137552	0.03125	0.104688	0	0.000181662	0.00125911	0.03125	0.0479485
ACB	Nucleus accumbens	CNU	375	2	4.39827	128	205	248	2.23744	1.30229	2.4536	1.99677	2.95582	2.47202	3.32237	2.46973	2.6621	3.26924	2.25411	2.9211	0	0.000184886	0.00165806	0.03125	0.104688	0	1.74865e-05	0.000704291	0.03125	0.0479485
OT	Olfactory tubercle	CNU	377	2	3.81906	128	205	248	3.63175	3.06741	5.13424	3.57402	4.55714	3.04817	4.46884	3.37569	3.34057	3.3688	2.56835	4.38388	0	9.96574e-05	0.00137552	0.03125	0.104688	0	6.62688e-05	0.000704291	0.03125	0.0479485
LSc	Lateral septal nucleus, caudal (caudodorsal) part	CNU	380	2	0.562781	144	203	237	1.39261	0.843231	1.79553	0.843231	1.26526	1.87822	1.88727	1.38389	1.25919	2.45905	0.623113	0.983566	0	0.000744334	0.00440032	0.03125	0.104688	0	0.00305898	0.00901281	0.03125	0.0479485
AAA	Anterior amygdalar area	CNU	386	2	0.494563	128	192	226	2.79216	1.29718	2.03254	1.82362	4.38581	3.61529	4.4248	1.62847	1.29503	2.9193	2.09199	3.71019	0	0.00259197	0.0118406	0.03125	0.104688	0	0.0030766	0.00901281	0.03125	0.0479485
FS	Fundus of striatum	CNU	376	2	0.431766	128	205	248	10.7419	-0.447214	2.23607	7.08571	11.3386	8.05859	6.77033	3.89407	3.314	5.64361	3.81758	4.95657	0	0.0195434	0.0654704	0.0625	0.155093	0	0.000306659	0.00177319	0.03125	0.0479485
MA	Magnocellular nucleus	CNU	400	2	0.364578	162	177	216	7.08963	4.0107	2.9732	-1.98946	4.78562	4.42244	6.22036	2.86518	2.07458	4.27005	3.05048	4.89127	0	0.0352267	0.0983439	0.0625	0.155093	0	0.00152929	0.00588424	0.03125	0.0479485
IA	Intercalated amygdalar nucleus	CNU	392	2	0.182828	128	192	226	0.774213	-1.56567	2.27112	1.78194	2.27112	2.7151	3.14591	0.185886	0.44935	3.53711	1.2171	1.35474	0	0.0871584	0.176958	0.09375	0.200465	0	0.0335934	0.0482305	0.03125	0.0479485
MEA	Medial amygdalar nucleus	CNU	393	2	2.02769	128	192	226	2.8862	0.917446	1.20801	1.69325	3.52306	2.10436	4.10538	0.98503	0.209403	4.09003	1.74234	2.28606	0	0.00396932	0.0166215	0.03125	0.104688	0	0.0188987	0.0319214	0.03125	0.0479485
CP	Caudoputamen	CNU	373	2	26.0193	152	214	249	1.62358	-0.0337576	0.100122	1.00085	2.4165	1.81157	6.85247	4.23317	3.71812	7.42385	4.5554	5.47551	0	0.0343724	0.0983439	0.0625	0.155093	0	0.000308764	0.00177319	0.03125	0.0479485
SF	Septofimbrial nucleus	CNU	383	2	0.474187	144	203	237	0.141451	-0.880995	4.13604	-0.880995	0.739544	4.1844	3.07847	1.635	0.881959	2.99622	1.61241	2.42689	0	0.25196	0.398771	0.5625	0.743832	0	0.00197338	0.00672287	0.03125	0.0479485
BA	Bed nucleus of the accessory olfactory tract	CNU	387	2	0.0250469	128	192	226	NaN	NaN	NaN	NaN	NaN	NaN	7.03947	-1.10932	-1.10932	7.71573	0.332609	4.1972	NaN	NaN	NaN	NaN	NaN	0	0.143465	0.152574	0.3125	0.328861
SH	Septohippocampal nucleus	CNU	384	2	0.0371875	144	203	237	1.57114	1.57114	2.23149	-0.950658	4.33478	-0.950658	2.31396	2.31396	3.50425	4.19566	2.09322	3.37417	0	0.175019	0.300674	0.125	0.256378	0	0.000353531	0.00197388	0.03125	0.0479485
GPe	Globus pallidus, external segment	CNU	396	2	1.56428	133	153	204	-1.25257	-1.25257	-1.25257	0.880241	0.0930829	-1.25257	5.10217	2.77058	1.69451	6.5166	3.68655	4.57114	1	0.13724	0.251499	0.125	0.256378	0	0.00218073	0.00718567	0.03125	0.0479485
TRS	Triangular nucleus of septum	CNU	405	2	0.356312	150	167	211	2.42247	-0.816064	2.33996	-0.816064	0.0128635	-0.816064	3.73727	1.37347	0.350096	4.0732	2.42698	2.71138	1	0.573232	0.763044	0.875	1.06591	0	0.0080867	0.0168284	0.03125	0.0479485
BAC	Bed nucleus of the anterior commissure	CNU	408	2	0.00754687	179	192	223	-0.447214	-0.447214	-0.447214	-0.447214	3.80569	-0.447214	7.20909	-0.538816	-0.538816	7.25787	-0.538816	0.898027	1	0.727189	0.902253	0.53125	0.741536	1	0.206496	0.216176	0.4375	0.453286
GPi	Globus pallidus, internal segment	CNU	397	2	0.423438	133	153	204	1.82544	-0.68142	-0.68142	0.900235	-0.68142	0.900235	6.79049	0.908434	-1.18215	9.69698	3.97109	1.45587	0	0.57901	0.765664	0.34375	0.527433	0	0.0812225	0.094917	0.09375	0.108923
LSv	Lateral septal nucleus, ventral part	CNU	382	2	0.607594	144	203	237	0.296881	-0.676681	0.203105	0.379597	1.03852	1.62478	2.14614	0.87968	0.230595	2.04824	1.3087	2.00695	0	0.196228	0.328685	0.21875	0.363378	0	0.00608128	0.0137341	0.03125	0.0479485
PVT	Paraventricular nucleus of the thalamus	TH	458	3	0.444219	255	144	159	1.83715	0.638685	1.81913	1.27938	1.71591	2.20761	3.17945	3.23906	2.59804	2.48965	2.88837	3.93078	0	0.000886629	0.00495035	0.03125	0.104688	0	3.03572e-05	0.000704291	0.03125	0.0479485
RE	Nucleus of reuniens	TH	460	3	0.424484	255	144	159	1.66524	1.24867	1.52575	1.34088	2.35614	2.15121	3.95708	3.48071	3.18385	3.86192	3.45792	4.95893	0	0.000229199	0.00184276	0.03125	0.104688	0	2.46419e-05	0.000704291	0.03125	0.0479485
GENv	Geniculate group, ventral thalamus	TH	470	3	0.523125	255	144	159	-0.599917	-0.968393	-1.33687	0.662576	0.79342	1.09504	5.77289	0.548982	-0.637625	3.12712	0.821956	1.5398	0	0.894117	1.05716	1	1.12291	0	0.102166	0.116678	0.09375	0.108923
ILM	Intralaminar nuclei of the dorsal thalamus	TH	462	3	1.60608	255	144	159	0.529963	-0.0528591	-0.74694	0.183527	1.35262	1.51793	6.50046	4.13162	3.59432	6.00694	2.54104	4.89793	0	0.244554	0.390122	0.3125	0.490723	0	0.000639875	0.00306226	0.03125	0.0479485
PT	Parataenial nucleus	TH	459	3	0.229781	255	144	159	2.43071	2.80547	1.53024	3.47585	4.00537	4.35522	2.48057	1.51907	1.15275	1.959	1.76571	2.71341	0	0.000795824	0.0045703	0.03125	0.104688	0	0.000472299	0.00243415	0.03125	0.0479485
MED	Medial group of the dorsal thalamus	TH	452	3	2.01323	255	144	159	1.43992	-0.439597	-0.0172173	1.12371	2.54639	2.39887	5.08529	2.07386	1.42172	4.78663	2.69418	4.33137	0	0.0652448	0.145064	0.15625	0.275493	0	0.00289697	0.00891305	0.03125	0.0479485
LH	Lateral habenula	TH	477	3	0.345828	255	144	159	-0.765697	0.773827	1.05316	0.709407	1.13327	1.3742	4.56425	2.16222	1.65282	3.64964	1.27584	2.52553	1	0.0710426	0.150311	0.09375	0.200465	0	0.00354108	0.00975009	0.03125	0.0479485
SPF	Subparafascicular nucleus	TH	422	3	0.203844	255	128	132	1.74533	-1.32222	1.99884	1.65012	3.79036	4.64201	3.7467	1.6823	1.10232	3.22972	1.34279	2.10685	0	0.0565704	0.132097	0.0625	0.155093	0	0.00388336	0.0104074	0.03125	0.0479485
MH	Medial habenula	TH	476	3	0.320188	255	144	159	0.86291	2.30134	4.75372	3.31873	3.65909	4.54982	3.77585	2.4442	0.752827	3.9588	1.02178	0.752827	0	0.00289144	0.0129151	0.03125	0.104688	0	0.0178459	0.0303985	0.03125	0.0479485
ATN	Anterior group of the dorsal thalamus	TH	443	3	2.15848	255	144	159	0.636376	-0.670081	-1.27216	0.418082	2.28423	2.50092	4.35449	2.71916	1.37088	3.90032	2.22527	4.0156	0	0.343825	0.508153	0.5625	0.743832	0	0.0013472	0.00541573	0.03125	0.0479485
VENT	Ventral group of the dorsal thalamus	TH	413	3	4.85839	255	128	132	-0.375545	-0.624274	-0.974838	1.05815	1.77289	1.93651	11.7398	4.5482	0.10861	11.7267	5.74321	8.70677	0	0.413903	0.602859	0.4375	0.632644	0	0.012197	0.0231282	0.03125	0.0479485
LAT	Lateral group of the dorsal thalamus	TH	437	3	3.07977	255	144	159	-1.26782	-1.07618	-2.63367	-3.49542	-1.26782	0.455676	7.792	4.77485	4.18383	7.27105	4.64998	6.41176	0	0.0393776	0.105532	0.0625	0.155093	0	0.000223735	0.00149902	0.03125	0.0479485
GENd	Geniculate group, dorsal thalamus	TH	427	3	1.42195	255	128	132	-0.492272	-1.79001	-2.50804	0.0660728	0.595236	-0.651957	4.94222	2.50282	2.57708	4.38644	1.62357	3.36029	0	0.152851	0.271886	0.21875	0.363378	0	0.00145113	0.00571916	0.03125	0.0479485
RT	Reticular nucleus of the thalamus	TH	469	3	1.44725	255	144	159	-0.565678	-1.29416	-1.29416	-0.139544	2.41196	1.68348	4.5641	1.40674	0.0188345	4.51195	2.05732	3.11052	0	0.842481	1.01253	0.9375	1.11501	0	0.0162321	0.0281263	0.03125	0.0479485
SPA	Subparafascicular area	TH	425	3	0.132094	255	128	132	-1.22474	-1.22474	0	1.94117	3.97788	4.06851	3.45529	2.19936	1.99274	3.01473	2.31704	3.34754	0	0.262208	0.411748	0.3125	0.490723	0	0.000130245	0.00102415	0.03125	0.0479485
PP	Peripeduncular nucleus	TH	426	3	0.0614375	255	128	132	0.598386	-1.18668	-1.18668	-1.18668	-1.18668	-1.18668	3.81829	1.18179	0.423245	3.87811	1.18179	3.80593	1	0.0304932	0.0901342	0.0625	0.155093	1	0.0153588	0.0268446	0.03125	0.0479485
SO	Supraoptic nucleus	HY	480	4	0.0468438	255	93	80	13.1809	12.8028	12.7594	11.9178	13.0483	12.1109	5.50821	0.71668	0.71668	5.96604	3.50489	4.27719	0	2.30215e-08	1.15683e-06	0.03125	0.104688	0	0.0141432	0.025138	0.03125	0.0479485
PVH	Paraventricular hypothalamic nucleus	HY	482	4	0.188688	255	93	80	2.11515	2.09453	2.37664	2.68241	2.99194	3.12813	3.0667	1.36596	0.579824	2.97003	1.48117	2.24686	0	3.07005e-05	0.000560982	0.03125	0.104688	0	0.00458344	0.0116617	0.03125	0.0479485
LHA	Lateral hypothalamic area	HY	524	4	2.07141	242	72	59	1.94874	1.04453	2.04074	2.14941	2.52285	2.20357	3.7619	1.41031	1.11737	3.56954	0.504471	1.91989	0	0.00019656	0.00165806	0.03125	0.104688	0	0.0132445	0.0240644	0.03125	0.0479485
MPO	Medial preoptic area	HY	492	4	0.556953	255	85	71	2.9184	1.42406	2.54868	2.87314	3.01563	2.32035	2.92169	1.77342	1.10828	1.81599	0.152518	2.29581	0	0.000144322	0.00143442	0.03125	0.104688	0	0.00785416	0.0166178	0.03125	0.0479485
AHN	Anterior hypothalamic nucleus	HY	504	4	0.710406	255	76	62	3.48773	0.280864	3.32152	1.30041	4.1906	2.49937	2.22577	0.135332	-0.0483635	1.72462	0.92991	1.50636	0	0.0086944	0.0323625	0.03125	0.104688	0	0.0330457	0.0479066	0.0625	0.0800159
SBPV	Subparaventricular zone	HY	498	4	0.1095	255	85	71	2.70767	1.30858	3.25993	3.02424	3.5872	3.17299	1.84371	-0.599988	0.0519455	1.39534	0.978365	1.49112	0	0.000341274	0.00244986	0.03125	0.104688	0	0.0758898	0.0905143	0.09375	0.108923
DMH	Dorsomedial nucleus of the hypothalamus	HY	490	4	0.376063	255	85	71	4.12782	1.79777	2.32147	3.087	3.64414	3.97431	3.16393	0.969929	0.768184	3.1036	-0.0853646	0.951502	0	0.000426661	0.0029572	0.03125	0.104688	0	0.042561	0.056654	0.0625	0.0800159
TU	Tuberal nucleus	HY	531	4	0.523438	242	72	59	3.85798	3.80582	4.53234	5.41044	4.89489	3.94578	5.57626	0.785357	-0.230955	4.99898	1.26542	2.60021	0	1.4844e-05	0.000337737	0.03125	0.104688	0	0.0480344	0.0614963	0.0625	0.0800159
SCH	Suprachiasmatic nucleus	HY	499	4	0.0660781	255	85	71	1.40877	1.39655	2.29958	1.53669	2.21277	1.67429	1.86581	1.2476	0.559685	1.28777	1.5778	1.77264	0	0.000124138	0.00137552	0.03125	0.104688	0	0.00083493	0.00381411	0.03125	0.0479485
PH	Posterior hypothalamic nucleus	HY	522	4	0.707047	255	76	62	1.75617	-0.701653	1.52596	1.04319	1.81849	2.86694	1.76599	1.36458	1.1928	1.72776	0.657631	1.44761	0	0.0352277	0.0983439	0.0625	0.155093	0	0.00044466	0.00241558	0.03125	0.0479485
ARH	Arcuate hypothalamic nucleus	HY	485	4	0.286328	255	93	80	3.63675	2.577	3.30332	3.354	2.86333	3.09797	3.47533	1.48186	1.40318	3.76425	1.5709	0.553379	0	5.31569e-06	0.000152636	0.03125	0.104688	0	0.0113007	0.0217127	0.03125	0.0479485
LPO	Lateral preoptic area	HY	525	4	0.554984	242	72	59	1.89794	1.0954	1.55663	1.64206	2.73079	2.2691	4.40039	2.58746	1.73057	3.29045	1.45563	3.1097	0	0.000507244	0.0032889	0.03125	0.104688	0	0.00155157	0.00588424	0.03125	0.0479485
RCH	Retrochiasmatic area	HY	529	4	0.147641	242	72	59	4.37596	3.2778	3.95496	2.34036	3.43448	3.35779	4.1453	1.15009	1.06601	3.58093	1.15009	2.90051	0	6.36662e-05	0.000984378	0.03125	0.104688	0	0.00908791	0.0182667	0.03125	0.0479485
VMH	Ventromedial hypothalamic nucleus	HY	521	4	0.549516	255	76	62	0.862128	0.813973	2.76498	2.0405	2.83306	1.98944	3.59989	0.0598549	0.368003	3.68692	1.10807	1.63236	0	0.00339797	0.0148476	0.03125	0.104688	0	0.0420698	0.0565478	0.03125	0.0479485
VLPO	Ventrolateral preoptic nucleus	HY	502	4	0.0670469	255	85	71	NaN	NaN	NaN	NaN	NaN	NaN	4.70424	1.45261	1.0371	4.36282	1.77491	4.50048	NaN	NaN	NaN	NaN	NaN	0	0.00818846	0.0168284	0.03125	0.0479485
PVpo	Periventricular hypothalamic nucleus, preoptic part	HY	497	4	0.143094	255	85	71	1.70184	2.09624	2.63062	1.73376	1.33799	-0.173953	2.09795	1.12577	0.820965	1.36638	1.23776	1.13188	0	0.010366	0.0378829	0.0625	0.155093	0	0.000730264	0.00341356	0.03125	0.0479485
MPN	Medial preoptic nucleus	HY	517	4	0.404625	255	76	62	2.57862	1.12528	2.15938	0.969466	1.61174	1.26466	2.36826	0.660629	0.314946	1.89815	1.12673	1.48543	0	0.00152486	0.00766242	0.03125	0.104688	0	0.00865417	0.0175706	0.03125	0.0479485
PVi	Periventricular hypothalamic nucleus, intermediate part	HY	484	4	0.200406	255	93	80	1.71563	1.07427	1.38079	1.97702	2.15153	2.15153	4.76435	0.418563	-0.953896	4.7252	1.05672	1.05672	0	0.000197977	0.00165806	0.03125	0.104688	0	0.114128	0.127443	0.09375	0.108923
ZI	Zona incerta	HY	532	4	1.8007	242	72	59	0.278308	0.681754	0.278308	1.45131	1.99341	2.2055	6.32369	1.55542	0.0722342	5.6712	1.35588	4.079	0	0.0217331	0.0694403	0.03125	0.104688	0	0.0284047	0.0432526	0.03125	0.0479485
MEPO	Median preoptic nucleus	HY	491	4	0.0405469	255	85	71	1.38165	1.2149	1.83116	1.45526	1.67573	2.3101	6.56683	3.65174	1.99712	4.50381	0.769656	3.34761	0	0.000149864	0.00143442	0.03125	0.104688	0	0.00820487	0.0168284	0.03125	0.0479485
AVPV	Anteroventral periventricular nucleus	HY	489	4	0.182984	255	85	71	2.48797	1.46692	2.81096	2.51026	1.74583	2.46515	3.65809	1.57117	0.15628	2.97601	0.373415	2.71955	0	0.000130024	0.00137552	0.03125	0.104688	0	0.0228836	0.0367969	0.03125	0.0479485
MBO	Mammillary body	HY	505	4	1.01611	255	76	62	2.03407	-1.92007	2.93249	2.18657	1.73934	2.28025	3.51264	1.3987	1.13728	3.66579	1.54559	2.76557	1	0.0822194	0.171382	0.09375	0.200465	0	0.00373797	0.0101531	0.03125	0.0479485
PVa	Periventricular hypothalamic nucleus, anterior part	HY	483	4	0.0498594	255	93	80	-1.89106	-1.13056	-0.0206515	-0.516559	1.57272	-0.0206515	4.31784	0.33916	-0.979737	3.27577	1.18291	2.51343	0	0.517347	0.697898	0.28125	0.455897	0	0.0776238	0.091242	0.09375	0.108923
PVHd	Paraventricular hypothalamic nucleus, descending division	HY	520	4	0.130766	255	76	62	0.373303	1.64963	0.903028	4.48614	4.9489	5.18837	3.01956	0.0788417	-0.393377	1.87326	1.66196	1.36885	0	0.0219986	0.0694403	0.03125	0.104688	0	0.055075	0.0696231	0.09375	0.108923
PSTN	Parasubthalamic nucleus	HY	527	4	0.166063	242	72	59	-0.223545	-0.926925	0.187906	0.706273	0.891286	3.17581	3.93504	0.901547	0.154239	2.52512	0.811211	3.11781	0	0.319295	0.489911	0.5625	0.743832	0	0.0263823	0.0413262	0.03125	0.0479485
PVp	Periventricular hypothalamic nucleus, posterior part	HY	496	4	0.126969	255	85	71	4.74829	-1.25257	2.52516	2.78439	2.52516	4.56325	3.6027	1.19606	2.09224	3.28488	0.534558	2.24348	0	0.0299949	0.0899846	0.0625	0.155093	0	0.00644575	0.0142373	0.03125	0.0479485
ADP	Anterodorsal preoptic nucleus	HY	487	4	0.0997656	255	85	71	1.84137	0.854273	3.14624	1.17205	2.53277	1.43169	4.39833	2.01302	-1.41364	2.79404	0.71297	4.01006	0	0.0035804	0.0153119	0.03125	0.104688	0	0.0657814	0.0806224	0.09375	0.108923
PMv	Ventral premammillary nucleus	HY	519	4	0.19575	255	76	62	1.38441	-0.447214	1.86404	4.17529	4.06769	4.62866	5.4095	1.82306	2.30148	4.89652	0.991862	3.47786	0	0.0241345	0.0735006	0.0625	0.155093	0	0.00704564	0.0153932	0.03125	0.0479485
AVP	Anteroventral preoptic nucleus	HY	488	4	0.0921562	255	85	71	1.10453	1.99532	-0.963807	2.22962	2.51639	0.817762	3.90606	0.260699	1.60281	3.23095	-0.110415	3.21899	0	0.0578334	0.132097	0.09375	0.200465	0	0.032772	0.0479066	0.0625	0.0800159
PMd	Dorsal premammillary nucleus	HY	518	4	0.131766	255	76	62	-0.255038	-1.80277	-0.255038	-0.82626	0.938639	2.34537	2.9649	2.04429	1.84424	-1.19326	0.979794	1.88441	0	0.96893	1.11289	0.9375	1.11501	0	0.0588618	0.0734859	0.09375	0.108923
PS	Parastrial nucleus	HY	495	4	0.0964531	255	85	71	1.88524	0.699409	-1.09469	0.988194	0.699409	1.88524	4.93609	0.768888	-0.862582	4.5212	1.58462	4.97798	0	0.117593	0.225107	0.1875	0.327717	0	0.0479853	0.0614963	0.09375	0.108923
OV	Vascular organ of the lamina terminalis	HY	493	4	0.00875	255	85	71	0.894427	4.79443	1.67924	1.67924	-0.447214	-0.447214	-0.377964	-0.377964	2.64575	5.66947	-0.377964	-0.377964	0	0.146273	0.262509	0.15625	0.275493	1	0.322289	0.330511	1	1.01005
STN	Subthalamic nucleus	HY	530	4	0.194734	242	72	59	2.99107	-0.68142	-0.68142	0.900235	3.4071	4.06354	6.74242	3.25881	3.4758	3.01279	1.98178	7.22846	0	0.110099	0.214854	0.15625	0.275493	0	0.00464619	0.0116736	0.03125	0.0479485
SFO	Subfornical organ	HY	500	4	0.0215937	255	85	71	NaN	NaN	NaN	NaN	NaN	NaN	17.5699	1.73205	3.08296	15.691	-0.57735	5.90596	NaN	NaN	NaN	NaN	NaN	0	0.0670256	0.0811575	0.0625	0.0800159
PD	Posterodorsal preoptic nucleus	HY	494	4	0.0116094	255	85	71	NaN	NaN	NaN	NaN	NaN	NaN	4.92967	1.31408	-0.67953	-0.67953	0.578298	-0.67953	NaN	NaN	NaN	NaN	NaN	1	0.412983	0.421368	0.875	0.897321
PST	Preparasubthalamic nucleus	HY	526	4	0.01275	242	72	59	2.23607	-0.447214	-0.447214	-0.447214	-0.447214	-0.447214	7.6508	1.16312	0.490703	6.15864	-0.658808	0.490703	1	1	1.12291	0.53125	0.741536	0	0.130669	0.14197	0.15625	0.168851
ASO	Accessory supraoptic group	HY	481	4	0.0060625	255	93	80	NaN	NaN	NaN	NaN	NaN	NaN	6.05696	0.489533	-0.575226	4.36936	0.489533	1.55429	NaN	NaN	NaN	NaN	NaN	0	0.10798	0.121932	0.15625	0.168851
IPN	Interpeduncular nucleus	MB	591	5	0.356516	255	166	255	1.50351	2.51256	2.59949	-1.30931	2.14463	2.59949	2.87299	1.65655	0.74897	2.25379	-0.863286	0.902631	1	0.0429056	0.112	0.0625	0.155093	0	0.0654811	0.0806224	0.09375	0.108923
ICc	Inferior colliculus, central nucleus	MB	542	5	1.1263	255	122	255	-0.442576	-2.27587	-0.0548715	0.803147	0.700187	1.11315	1.73734	0.638704	0.579299	0.93658	-0.579188	1.1438	0	0.960971	1.11289	0.84375	1.04045	0	0.0647857	0.0803823	0.0625	0.0800159
SCsg	Superior colliculus, superficial gray layer	MB	539	5	1.15198	255	122	255	-0.464369	-0.55336	-0.355454	-0.033679	-0.00112723	0.430106	3.04477	0.678293	0.746232	2.33728	0.855418	2.99283	0	0.326806	0.490209	0.21875	0.363378	0	0.0125043	0.0234894	0.03125	0.0479485
ICe	Inferior colliculus, external nucleus	MB	544	5	1.99797	255	122	255	-0.382197	-1.28123	0.520557	0.856034	0.584601	0.827032	2.38038	0.0645238	-0.155136	1.09956	-1.04703	1.79295	0	0.611922	0.796246	0.5625	0.743832	0	0.24864	0.257612	0.3125	0.328861
SCig	Superior colliculus, motor related, intermediate gray layer	MB	560	5	2.03683	255	144	255	0.410764	-0.515697	-0.0160279	0.697921	0.218559	0.947792	2.35043	0.541016	-0.0461527	1.93483	0.202382	2.20363	0	0.230807	0.377172	0.3125	0.490723	0	0.0421999	0.0565478	0.0625	0.0800159
ICd	Inferior colliculus, dorsal nucleus	MB	543	5	1.32262	255	122	255	-0.230039	-1.31954	1.04596	0.684348	1.00523	1.3483	2.24758	0.0941648	0.46977	1.11032	-0.182262	1.93254	0	0.353243	0.518262	0.4375	0.632644	0	0.066841	0.0811575	0.09375	0.108923
SCzo	Superior colliculus, zonal layer	MB	540	5	0.363312	255	122	255	0.0739149	-0.593329	-0.704858	-0.115757	0.420355	0.631702	2.77904	1.39628	1.72865	2.35235	1.07439	2.56582	0	0.834675	1.01253	0.84375	1.04045	0	0.000862717	0.00385347	0.03125	0.0479485
SCdg	Superior colliculus, motor related, deep gray layer	MB	557	5	1.19505	255	144	255	0.0933633	0.0403669	-1.38589	0.856447	0.144281	1.50219	2.66713	0.586696	0.287444	1.88369	-0.5736	2.29201	0	0.620263	0.799185	0.3125	0.490723	0	0.0713681	0.0858982	0.09375	0.108923
SCop	Superior colliculus, optic layer	MB	538	5	0.643047	255	122	255	0.133088	-0.421604	0.183803	-0.208417	0.0175701	0.829163	2.63201	0.170902	-0.184761	2.18665	0.483686	2.69535	0	0.631905	0.808999	0.84375	1.04045	0	0.0559491	0.0702861	0.09375	0.108923
EW	Edinger-Westphal nucleus	MB	578	5	0.026	255	144	255	3.51606	4.33478	5.55281	7.98277	4.93702	7.88712	3.71618	2.66946	1.55514	3.39261	0.83006	2.31383	0	0.000656735	0.00412512	0.03125	0.104688	0	0.00292667	0.00891305	0.03125	0.0479485
PRC	Precommissural nucleus	MB	562	5	0.171375	255	144	255	-0.375766	-0.15454	-4.98929	-2.07848	0.832329	2.35234	2.01127	0.884221	0.158657	1.56514	1.34844	1.3674	0	0.510428	0.693217	0.6875	0.891532	0	0.00529784	0.0123822	0.03125	0.0479485
SCiw	Superior colliculus, motor related, intermediate white layer	MB	559	5	2.09277	255	144	255	0.180366	-0.127127	-0.593957	0.74609	1.18436	1.30639	2.76688	-0.142256	-1.02198	2.46648	0.614997	2.63235	0	0.205068	0.340558	0.21875	0.363378	0	0.125299	0.136875	0.21875	0.235127
MPT	Medial pretectal area	MB	568	5	0.0440781	255	144	255	0.353024	-0.833908	-0.110824	0.154701	0.0330538	0.353024	2.10101	2.9603	1.75731	3.15109	-0.0480534	2.20406	0	0.964387	1.11289	0.65625	0.856534	0	0.00753373	0.0161093	0.0625	0.0800159
VTA	Ventral tegmental area	MB	552	5	0.427578	255	144	255	1.36306	0.620819	0.620819	0.780927	1.16276	1.16276	5.79784	4.40301	3.33226	6.60218	0.461013	5.39799	0	0.000742926	0.00440032	0.03125	0.104688	0	0.0048787	0.0119099	0.03125	0.0479485
DR	Dorsal nucleus raphe	MB	602	5	0.153344	255	166	255	1.36228	1.5177	-0.444206	1.77108	0.254637	0.953481	4.15128	0.556667	0.960837	3.80869	0.0519067	2.05346	0	0.0475284	0.119415	0.09375	0.200465	0	0.0405224	0.0557877	0.03125	0.0479485
NPC	Nucleus of the posterior commissure	MB	570	5	0.288813	255	144	255	1.21127	-0.181725	-1.7232	-0.952464	1.12887	0.837136	3.00079	1.56083	1.03248	2.38313	0.536615	1.97886	0	0.91833	1.07944	1	1.12291	0	0.00503654	0.0119099	0.03125	0.0479485
APN	Anterior pretectal nucleus	MB	567	5	1.27603	255	144	255	-1.24584	-2.05501	-2.05501	-1.24584	-0.772499	1.55346	3.79153	2.65775	1.62684	4.94385	1.38444	4.3723	1	0.135235	0.251499	0.21875	0.363378	0	0.00342227	0.00955385	0.03125	0.0479485
SNr	Substantia nigra, reticular part	MB	551	5	1.54812	255	144	255	4.74662	2.49975	2.49975	2.94334	2.73544	3.12931	4.45167	1.95435	2.08465	5.05768	1.37774	3.8694	1	0.000291892	0.00225655	0.03125	0.104688	0	0.00394144	0.0104241	0.03125	0.0479485
NOT	Nucleus of the optic tract	MB	569	5	0.205609	255	144	255	-0.46993	-0.976152	-0.976152	-0.46993	-0.976152	0.332412	5.95537	1.42955	1.29043	5.08434	0.217664	2.77137	0	0.037903	0.104363	0.0625	0.155093	0	0.0301518	0.0448927	0.03125	0.0479485
CLI	Central linear nucleus raphe	MB	601	5	0.0834375	255	166	255	1.96396	3.69477	-0.654654	2.38546	5.89188	-0.654654	5.0977	1.83074	-1.66382	5.26767	2.11364	4.43623	0	0.0979402	0.193	0.15625	0.275493	0	0.0469816	0.0609246	0.0625	0.0800159
RL	Rostral linear nucleus raphe	MB	600	5	0.0554062	255	166	255	NaN	NaN	NaN	NaN	NaN	NaN	2.5902	1.47622	0.942618	2.60033	1.79762	3.24914	NaN	NaN	NaN	NaN	NaN	0	0.00176123	0.00643649	0.03125	0.0479485
SNc	Substantia nigra, compact part	MB	587	5	0.197328	255	166	255	0.717944	1.14486	-0.912365	1.74655	1.74655	0.717944	6.3257	2.78908	2.30386	5.35182	0.796823	4.98701	0	0.0850071	0.174351	0.15625	0.275493	0	0.0074017	0.0159972	0.03125	0.0479485
SCdw	Superior colliculus, motor related, deep white layer	MB	558	5	0.332547	255	144	255	0.242536	1.69775	-1.21268	0.242536	2.54899	3.40024	3.4698	0.7007	-0.313217	2.74402	-0.416971	2.90274	0	0.158636	0.277268	0.15625	0.275493	0	0.0850842	0.0982869	0.15625	0.168851
RN	Red nucleus	MB	575	5	0.788172	255	144	255	-0.853578	0.210383	-0.853578	-0.853578	0.488991	-0.853578	5.36785	1.55112	-0.765353	5.62196	1.33073	5.00091	1	0.137637	0.251499	0.125	0.256378	0	0.039252	0.0544114	0.0625	0.0800159
OP	Olivary pretectal nucleus	MB	571	5	0.0583281	255	144	255	0.0298864	-0.70169	-0.70169	0.0298864	0.996978	-0.70169	3.24642	3.35588	2.36131	3.39046	1.28194	2.28523	0	0.554892	0.743556	0.71875	0.926082	0	0.000561729	0.00280179	0.03125	0.0479485
ND	Nucleus of Darkschewitsch	MB	564	5	0.0917344	255	144	255	-0.68142	2.99107	-0.68142	2.99107	0.900235	1.82544	4.43131	2.26315	1.87865	4.29559	1.68508	3.34505	0	0.132826	0.249513	0.15625	0.275493	0	0.00182283	0.00654266	0.03125	0.0479485
VTN	Ventral tegmental nucleus	MB	581	5	0.0377813	255	144	255	NaN	NaN	NaN	NaN	NaN	NaN	7.89908	1.31408	-0.67953	3.30769	-0.67953	3.97499	NaN	NaN	NaN	NaN	NaN	0	0.117755	0.130048	0.15625	0.168851
IF	Interfascicular nucleus raphe	MB	590	5	0.0868594	255	166	255	0.654654	-0.654654	-0.654654	0.654654	-0.654654	0.654654	4.45918	0.749469	0.40126	4.58802	1.47712	3.78625	1	1	1.12291	1	1.12291	0	0.0215602	0.0352324	0.03125	0.0479485
PPT	Posterior pretectal nucleus	MB	572	5	0.144141	255	144	255	-0.447214	-0.447214	-0.447214	-0.447214	2.23607	2.23607	3.84133	2.05342	-0.370234	3.01192	-0.0196869	3.11759	1	0.465023	0.647862	0.8125	1.0207	0	0.0421968	0.0565478	0.15625	0.168851
INC	Interstitial nucleus of Cajal	MB	563	5	0.0794688	255	144	255	NaN	NaN	NaN	NaN	NaN	NaN	4.34437	0.824121	0.602464	4.18933	1.00523	3.34094	NaN	NaN	NaN	NaN	NaN	0	0.021137	0.0348241	0.03125	0.0479485
CS	Superior central nucleus raphe	HB	630	6	0.599031	255	195	149	5.08853	6.24569	5.87334	5.81378	4.58948	6.09479	1.6393	1.71012	0.871759	3.45656	1.75181	3.68162	0	4.11082e-06	0.000152636	0.03125	0.104688	0	0.00500856	0.0119099	0.03125	0.0479485
NTS	Nucleus of the solitary tract	HB	649	6	0.849281	255	165	210	2.44307	2.37384	2.91335	2.95088	2.84492	3.83977	3.67768	1.834	1.54453	1.65544	2.45752	2.61366	0	3.96229e-05	0.000663684	0.03125	0.104688	0	0.000912679	0.00398801	0.03125	0.0479485
PB	Parabrachial nucleus	HB	608	6	1.12134	255	174	111	0.408332	0.28951	1.197	3.19361	1.81153	2.17892	8.5995	0.160836	-0.0965262	7.89536	2.92117	6.18274	0	0.0206548	0.0680593	0.03125	0.104688	0	0.0409868	0.0560432	0.0625	0.0800159
PG	Pontine gray	HB	619	6	0.964047	255	186	134	-4.00624	-3.26212	-3.26212	-1.33858	0.315152	-4.00624	2.4901	1.25737	0.0567768	-1.16577	1.31976	2.97422	0	0.0143342	0.0496754	0.0625	0.155093	0	0.123801	0.135978	0.09375	0.108923
VNC	Vestibular nuclei	HB	684	6	3.20811	255	179	217	0.496039	1.14226	0.868345	0.849762	0.849762	-0.46199	5.25098	1.95235	1.77643	4.93568	1.7907	3.48664	1	0.0437965	0.11286	0.0625	0.155093	0	0.00453838	0.0116617	0.03125	0.0479485
GRN	Gigantocellular reticular nucleus	HB	662	6	2.61678	255	179	217	0.492215	-0.605039	0.760982	-0.605039	1.31071	0.760982	7.53741	2.23549	2.69745	5.97689	2.24736	3.70454	0	0.323212	0.490209	0.28125	0.455897	0	0.00632678	0.0141298	0.03125	0.0479485
LRN	Lateral reticular nucleus	HB	668	6	0.569766	255	179	217	0.557662	-0.215463	1.7429	0.171099	1.39647	1.42663	3.38659	2.22401	2.64032	3.26832	2.33568	1.48431	0	0.0465728	0.118495	0.09375	0.200465	0	0.000308539	0.00177319	0.03125	0.0479485
PCG	Pontine central gray	HB	618	6	0.543375	255	186	134	2.09476	-1.99325	0.932217	2.27522	2.0445	2.46524	4.24286	2.11574	0.945495	3.10243	2.4253	3.71035	1	0.119493	0.226586	0.09375	0.200465	0	0.00233433	0.00756774	0.03125	0.0479485
PRNc	Pontine reticular nucleus, caudal part	HB	620	6	2.34809	255	186	134	0.59835	0.168383	-0.998476	1.53698	0.881562	0.881562	1.94977	1.75851	1.64019	3.55295	1.06162	3.11611	0	0.206707	0.340558	0.28125	0.455897	0	0.00249412	0.00795743	0.03125	0.0479485
IRN	Intermediate reticular nucleus	HB	665	6	2.77605	255	179	217	0.864754	-1.15139	-0.202151	0.425259	1.71739	1.05267	3.93483	1.15915	1.07623	3.8254	1.73475	2.57584	0	0.325174	0.490209	0.4375	0.632644	0	0.00597913	0.0136569	0.03125	0.0479485
MDRN	Medullary reticular nucleus	HB	672	6	2.032	255	179	217	-0.0847535	0.0762097	1.23969	0.464038	0.690903	1.44275	6.9046	-0.958572	1.12332	6.4146	4.58462	3.77923	0	0.0513478	0.123341	0.09375	0.200465	0	0.0331295	0.0479066	0.0625	0.0800159
AP	Area postrema	HB	640	6	0.0530781	255	165	210	NaN	NaN	NaN	NaN	NaN	NaN	NaN	NaN	NaN	NaN	NaN	NaN	NaN	NaN	NaN	NaN	NaN	NaN	NaN	NaN	NaN	NaN
PRNr	Pontine reticular nucleus	HB	634	6	2.3635	255	195	149	-0.27299	-0.0177181	-0.528262	-0.17594	0.213793	0.213793	1.55001	1.2336	-0.0150657	3.71538	1.06709	3.30486	0	0.461794	0.647862	0.5625	0.743832	0	0.0265228	0.0413262	0.0625	0.0800159
NLL	Nucleus of the lateral lemniscus	HB	606	6	0.723875	255	174	111	-0.977322	2.58157	-0.977322	3.63276	4.76199	4.88661	4.49726	0.872056	0.805985	3.35175	-0.0900902	3.32605	0	0.0882272	0.177337	0.15625	0.275493	0	0.0361071	0.0511093	0.0625	0.0800159
DMX	Dorsal motor nucleus of the vagus nerve	HB	661	6	0.174047	255	179	217	9.59823	2.65511	6.01732	10.3438	8.61041	9.99367	5.58679	1.57854	4.33792	-0.556411	3.97815	4.46119	0	0.00134151	0.00691392	0.03125	0.104688	0	0.0177363	0.0303985	0.0625	0.0800159
TRN	Tegmental reticular nucleus	HB	623	6	0.68975	255	186	134	-1.18772	-0.0667317	-1.18772	0.186941	-0.754061	-1.18772	2.56697	0.979846	-0.136555	2.26189	1.11827	2.9347	0	0.0390657	0.105532	0.09375	0.200465	0	0.0190757	0.0319518	0.0625	0.0800159
CN	Cochlear nuclei	HB	641	6	1.62886	255	165	210	3.64386	-1	9.98371	4.61471	10.4558	-1	4.20248	-0.193966	-0.0026874	4.03541	0.566028	2.17335	0	0.0827065	0.171382	0.15625	0.275493	0	0.0771549	0.0912243	0.15625	0.168851
DCN	Dorsal column nuclei	HB	644	6	0.415219	255	165	210	-0.654654	-0.654654	4.39148	-0.654654	-0.654654	2.40221	1.92882	2.53227	0.886796	-0.68973	3.80372	-0.68973	1	0.470587	0.647862	1	1.12291	0	0.13892	0.150124	0.15625	0.168851
PAS	Parasolitary nucleus	HB	676	6	0.0279688	255	179	217	-0.447214	4.31214	3.70493	0.590821	-0.447214	5.25352	-0.377964	2.64575	2.64575	-0.377964	14.3112	-0.377964	0	0.093034	0.185147	0.15625	0.275493	1	0.243099	0.253176	0.34375	0.359863
PGRN	Paragigantocellular reticular nucleus	HB	677	6	0.948766	255	179	217	1.13026	-0.698652	-0.698652	2.6473	3.5487	1.13026	2.84392	2.97244	2.8962	4.63144	2.62608	2.30564	0	0.155078	0.273428	0.125	0.256378	1	0.000258015	0.00167294	0.03125	0.0479485
PARN	Parvicellular reticular nucleus	HB	675	6	2.24742	255	179	217	0.0090358	-1.43309	-1.43309	0.241166	1.78244	1.51422	2.33268	1.34218	1.02863	4.89493	1.50068	0.431445	0	0.84863	1.01253	0.5625	0.743832	0	0.0310725	0.0459234	0.03125	0.0479485
LC	Locus ceruleus	HB	631	6	0.0145469	255	195	149	2.82587	1.42718	2.97136	2.66504	3.54332	3.63586	3.24236	0.964205	1.6967	2.26417	-0.0383842	2.72501	0	0.00032334	0.00240709	0.03125	0.104688	0	0.0142574	0.025138	0.0625	0.0800159
SPVI	Spinal nucleus of the trigeminal, interpolar part	HB	651	6	1.84597	255	165	210	1.17448	-1.13405	-0.145265	-0.145265	-0.145265	1.36136	3.08272	0.579789	0.641804	2.39885	0.641804	1.40928	0	0.692516	0.875445	1	1.12291	0	0.0199385	0.033121	0.03125	0.0479485
PHY	Perihypoglossal nuclei	HB	680	6	0.270953	255	179	217	2.52337	1.01186	1.29802	-0.765915	2.18691	1.53183	7.75163	4.2958	3.57539	7.44126	2.64894	4.52549	0	0.0403867	0.106812	0.0625	0.155093	0	0.00197195	0.00672287	0.03125	0.0479485
NI	Nucleus incertus	HB	633	6	0.105875	255	195	149	NaN	NaN	NaN	NaN	NaN	NaN	3.83637	0.193201	1.96532	2.33655	2.761	3.26716	NaN	NaN	NaN	NaN	NaN	0	0.00567255	0.0131055	0.03125	0.0479485
LDT	Laterodorsal tegmental nucleus	HB	632	6	0.203969	255	195	149	0.264453	-1.32786	0.730175	0.907234	0.520758	-1.32786	4.52507	0.863926	-0.282652	5.13121	0.912477	3.24697	0	0.929377	1.08607	0.9375	1.11501	0	0.0450304	0.0591576	0.0625	0.0800159
V	Motor nucleus of trigeminal	HB	624	6	0.354563	255	186	134	-1	-1	2.16993	3	-1	8.40088	1.28154	0.0596436	1.0689	2.923	-1.26767	3.34326	0	0.29673	0.462347	0.4375	0.632644	0	0.140873	0.150614	0.15625	0.168851
DTN	Dorsal tegmental nucleus	HB	616	6	0.103703	255	186	134	4.21845	1.41421	3.53553	4.77643	6.01732	6.01732	5.91903	-0.325506	0.186126	5.03541	-0.325506	4.16077	0	0.00169491	0.00811135	0.03125	0.104688	0	0.0945174	0.10856	0.3125	0.328861
B	Barringtons nucleus	HB	615	6	0.0155312	255	186	134	3.92903	-0.447214	2.23607	4.91935	5.99849	-0.447214	4.57426	-1.15081	-1.15081	6.15545	2.3416	3.05792	0	0.0602387	0.136045	0.15625	0.275493	0	0.116796	0.129702	0.15625	0.168851
SPVC	Spinal nucleus of the trigeminal, caudal part	HB	650	6	1.68169	255	165	210	-0.447214	-0.447214	1.38441	0.708413	-0.447214	4.70622	-0.522329	-0.522329	0.714888	-0.522329	3.18932	-0.522329	1	0.318147	0.489911	0.4375	0.632644	1	0.641913	0.651639	1	1.01005
MARN	Magnocellular reticular nucleus	HB	671	6	0.532797	255	179	217	-0.678449	-0.678449	1.27396	-0.678449	3.39224	-0.678449	4.25608	3.05787	2.61968	3.66571	2.71889	2.89057	1	0.65766	0.836643	1	1.12291	0	6.16795e-05	0.000704291	0.03125	0.0479485
XII	Hypoglossal nucleus	HB	690	6	0.281359	255	179	217	1.94761	0.941029	-0.581869	-0.581869	-0.581869	0.941029	3.75642	0.160128	3.47153	-1.1209	3.13458	-1.1209	0	0.467373	0.647862	0.34375	0.527433	0	0.206172	0.216176	0.3125	0.328861
SOC	Superior olivary complex	HB	610	6	0.898953	255	174	111	-0.853578	-0.853578	-0.853578	-0.182294	-0.853578	-0.853578	4.13989	0.928753	0.889725	3.43045	-0.314213	3.98444	1	0.00117625	0.00622172	0.03125	0.104688	0	0.0379426	0.053332	0.0625	0.0800159
SLD	Sublaterodorsal nucleus	HB	637	6	0.0471094	255	195	149	0.704309	1.09322	-0.780869	-0.780869	1.39488	-0.780869	4.00583	1.44485	3.56039	1.44485	2.75538	1.59102	1	0.750853	0.925898	0.875	1.06591	0	0.00319568	0.00904691	0.03125	0.0479485
AMB	Nucleus ambiguus	HB	658	6	0.0431719	255	179	217	NaN	NaN	NaN	NaN	NaN	NaN	11.177	2.74713	2.23556	12.0133	1.91135	4.546	NaN	NaN	NaN	NaN	NaN	1	0.0278732	0.0427672	0.03125	0.0479485
VII	Facial motor nucleus	HB	656	6	0.917312	255	179	217	4.21845	-0.707107	-0.707107	-0.707107	1.41421	6.63146	5.48875	1.34236	0.449305	4.54453	1.34236	1.86345	0	0.239527	0.385159	0.4375	0.632644	0	0.0288278	0.0434427	0.03125	0.0479485
NTB	Nucleus of the trapezoid body	HB	648	6	0.154609	255	165	210	-0.627917	-0.627917	-0.627917	-0.627917	-0.627917	-0.627917	7.88599	-0.919343	3.80163	9.54773	-0.919343	4.34819	1	5.86702e-80	3.9309e-78	0.03125	0.104688	0	0.0761041	0.0905143	0.15625	0.168851
SPVO	Spinal nucleus of the trigeminal, oral part	HB	652	6	0.999656	255	165	210	-0.860346	-0.860346	-0.860346	1.05426	1.36244	-0.860346	6.36585	0.757764	1.26118	3.89452	0.383001	2.08272	1	0.712615	0.895223	1	1.12291	0	0.0462819	0.0604068	0.03125	0.0479485
RPO	Nucleus raphe pontis	HB	635	6	0.0963125	255	195	149	NaN	NaN	NaN	NaN	NaN	NaN	5.54148	3.37546	2.64381	3.37546	2.53458	5.68195	NaN	NaN	NaN	NaN	NaN	0	0.0010954	0.00458697	0.03125	0.0479485
RO	Nucleus raphe obscurus	HB	695	6	0.0383594	255	198	226	NaN	NaN	NaN	NaN	NaN	NaN	22.1772	20.0871	21.6789	15.6036	10.8111	10.4619	NaN	NaN	NaN	NaN	NaN	0	0.000571509	0.00280179	0.03125	0.0479485
IO	Inferior olivary complex	HB	664	6	0.509672	255	179	217	0.654654	-0.654654	-0.654654	-0.654654	2.72986	-0.654654	6.74149	5.67789	5.31363	5.2556	7.45327	4.73386	1	0.829507	1.01253	1	1.12291	0	3.37463e-05	0.000704291	0.03125	0.0479485
SUT	Supratrigeminal nucleus	HB	622	6	0.26	255	186	134	0.707107	-1.41421	-1.41421	1.948	-1.41421	-1.41421	5.89585	1.97609	1.83682	6.62975	-0.151404	4.72488	1	0.442243	0.634934	0.5625	0.743832	0	0.0238353	0.0380229	0.0625	0.0800159
RM	Nucleus raphe magnus	HB	693	6	0.119641	255	198	226	-0.654654	0.654654	0.654654	-0.654654	0.654654	-0.654654	4.30098	1.71196	2.99149	2.05894	1.5699	3.27905	1	1	1.12291	1	1.12291	0	0.00168951	0.00628873	0.03125	0.0479485
LIN	Linear nucleus of the medulla	HB	667	6	0.0616875	255	179	217	2.23607	2.23607	-0.447214	-0.447214	2.23607	-0.447214	6.02066	0.591012	-0.564124	5.21155	1.74615	5.40784	1	0.19623	0.328685	0.34375	0.527433	0	0.044762	0.0591576	0.0625	0.0800159
x	Nucleus x	HB	689	6	0.0569687	255	179	217	-0.447214	-0.447214	-0.447214	-0.447214	-0.447214	-0.447214	7.65678	0.924279	1.68604	7.70826	3.75005	4.29053	0	0	0	0.03125	0.104688	0	0.0141351	0.025138	0.03125	0.0479485
PSV	Principal sensory nucleus of the trigeminal	HB	607	6	1.09886	255	174	111	-0.447214	-0.447214	-0.447214	2.23607	2.23607	-0.447214	3.01828	-0.0611381	1.07825	4.35225	1.14867	4.43585	1	0.465023	0.647862	0.8125	1.0207	0	0.0289618	0.0434427	0.0625	0.0800159
y	Nucleus y	HB	691	6	0.0234531	255	179	217	3.80569	-0.447214	-0.447214	-0.447214	-0.447214	-0.447214	7.72603	1.52979	-0.377964	10.2768	-0.377964	-0.377964	1	0.727189	0.902253	0.53125	0.741536	1	0.172817	0.182823	0.4375	0.453286
SLC	Subceruleus nucleus	HB	636	6	0.0264687	255	195	149	-0.447214	-0.447214	-0.447214	-0.447214	2.23607	-0.447214	7.65607	2.59546	4.03684	0.690071	2.59546	4.23503	1	1	1.12291	0.53125	0.741536	0	0.0126963	0.0236292	0.03125	0.0479485
ECU	External cuneate nucleus	HB	647	6	0.205156	255	165	210	NaN	NaN	NaN	NaN	NaN	NaN	3.21027	0.548271	-0.883113	1.03249	1.80692	1.42592	NaN	NaN	NaN	NaN	NaN	0	0.0849887	0.0982869	0.09375	0.108923
VI	Abducens nucleus	HB	655	6	0.0304531	255	179	217	-0.447214	-0.447214	-0.447214	-0.447214	-0.447214	-0.447214	NaN	NaN	NaN	NaN	NaN	NaN	0	0	0	0.03125	0.104688	NaN	NaN	NaN	NaN	NaN
RPA	Nucleus raphe pallidus	HB	694	6	0.06775	255	198	226	NaN	NaN	NaN	NaN	NaN	NaN	-0.774597	2.49929	8.81771	3.35659	9.45875	4.02156	NaN	NaN	NaN	NaN	NaN	0	0.0355594	0.050691	0.0625	0.0800159
SG	Supragenual nucleus	HB	621	6	0.0173594	255	186	134	NaN	NaN	NaN	NaN	NaN	NaN	21.8639	9.07341	-0.377964	17.8934	4.5535	9.1608	NaN	NaN	NaN	NaN	NaN	0	0.0277114	0.0427672	0.0625	0.0800159
ACVII	Accessory facial motor nucleus	HB	657	6	0.00551562	255	179	217	NaN	NaN	NaN	NaN	NaN	NaN	16.0917	1.52979	-0.377964	16.8132	-0.377964	4.0517	NaN	NaN	NaN	NaN	NaN	1	0.113617	0.127443	0.15625	0.168851
ICB	Infracerebellar nucleus	HB	663	6	0.0540313	255	179	217	NaN	NaN	NaN	NaN	NaN	NaN	13.0043	-0.558595	-0.558595	8.70329	1.17016	2.18141	NaN	NaN	NaN	NaN	NaN	0	0.140621	0.150614	0.15625	0.168851
ISN	Inferior salivatory nucleus	HB	666	6	0.0071875	255	179	217	NaN	NaN	NaN	NaN	NaN	NaN	4.92142	-0.558595	-0.558595	-0.558595	-0.558595	-0.558595	NaN	NaN	NaN	NaN	NaN	1	0.713706	0.720879	0.53125	0.547596
PPY	Parapyramidal nucleus	HB	683	6	0.0946562	255	179	217	NaN	NaN	NaN	NaN	NaN	NaN	-0.377964	5.66947	-0.377964	13.4857	-0.377964	-0.377964	NaN	NaN	NaN	NaN	NaN	1	0.262383	0.270457	1	1.01005

## Sheet: Figure 2-figure supplement 1
Name	Label	Group	ID	GroupID	Volume	Color_1	Color_2	Color_3	ISO_1	ISO_2	ISO_3	ISO_4	ISO_5	ISO_6	Ket_1	Ket_2	Ket_3	Ket_4	Ket_5	Ket_6	ISONormTest	ISOtTestP	ISOtTestPAdj	ISOWilcoxonP	ISOWilcoxonPAdj	KetNormTest	KettTestP	KettTestPAdj	KetWilcoxonP	KetWilcoxonPAdj
PALd	Pallidum, dorsal region	PAL	395	1	1.98772	133	153	204	0.497943	-1.22094	-1.22094	0.948048	-0.136445	-0.136445	4.76597	2.45357	1.38052	6.1308	3.4015	4.14315	0	0.582885	0.644469	0.59375	0.684103	0	0.00297995	0.00504383	0.03125	0.033125
PALv	Pallidum, ventral region	PAL	398	1	3.39242	162	177	216	3.2264	1.80249	2.82251	1.9396	3.0102	2.95118	6.03752	3.49763	3.63653	4.96176	3.0508	5.09137	0	0.000122762	0.000625219	0.03125	0.0637019	0	0.000245138	0.000618682	0.03125	0.033125
PALm	Pallidum, medial region	PAL	401	1	1.50986	150	167	211	2.68542	1.9252	3.23359	1.99801	3.59281	3.15286	4.10553	2.6923	2.38123	3.70561	1.82948	3.22444	0	0.000182266	0.000743084	0.03125	0.0637019	0	0.00034876	0.000770179	0.03125	0.033125
PALc	Pallidum, caudal region	PAL	406	1	1.34805	179	192	223	3.58246	2.56705	3.25977	2.76086	3.49392	3.79227	2.75809	1.46908	0.891649	2.93174	1.08553	2.04003	0	1.52717e-05	0.000269799	0.03125	0.0637019	0	0.0031405	0.00504383	0.03125	0.033125
STRd	Striatum dorsal region	STR	372	2	26.0193	152	214	249	1.62358	-0.0337576	0.100122	1.00085	2.4165	1.81157	6.85294	4.23317	3.71812	7.42385	4.5554	5.47551	0	0.0343724	0.0607245	0.0625	0.103516	0	0.000308835	0.000711662	0.03125	0.033125
STRv	Striatum ventral region	STR	374	2	8.64909	128	205	248	3.1485	2.09894	4.0111	2.88526	4.08712	3.17597	3.89586	2.8354	2.97885	3.63076	2.45363	3.53425	0	0.000124674	0.000625219	0.03125	0.0637019	0	2.99049e-05	0.000265298	0.03125	0.033125
LSX	Lateral septal complex	STR	378	2	3.56273	144	203	237	2.78791	1.71752	3.04512	2.48563	2.63904	3.1421	1.77137	1.13625	1.08874	1.70497	0.954467	1.49056	0	5.58777e-05	0.0004421	0.03125	0.0637019	0	0.00020232	0.000536147	0.03125	0.033125
sAMY	Striatum-like amygdalar nuclei	STR	385	2	4.04783	128	192	226	3.39381	2.41967	3.32055	3.45055	3.87672	3.92639	6.07115	0.881017	0.0272072	5.48574	2.31967	3.85871	0	2.14412e-05	0.000284096	0.03125	0.0637019	0	0.0267424	0.028347	0.03125	0.033125
MOB	Main olfactory bulb	OLF	301	3	16.4632	154	210	189	1.75591	-1.35475	2.2425	1.83664	2.66565	1.84736	2.66336	2.38381	2.29439	1.22569	1.43425	1.61491	1	0.0512194	0.0848321	0.0625	0.103516	0	0.000467223	0.000990513	0.03125	0.033125
AOB	Accessory olfactory bulb	OLF	302	3	0.651531	157	240	210	-0.818532	-0.818532	1.75594	1.15032	3.33303	1.45797	3.0847	3.1105	3.20824	1.88428	1.09667	2.16282	0	0.183557	0.243213	0.15625	0.21234	0	0.000943407	0.0019231	0.03125	0.033125
AON	Anterior olfactory nucleus	OLF	306	3	4.8697	84	191	148	2.46769	0.644566	3.0695	0.415366	3.12299	1.01434	2.58418	2.29149	2.15621	2.08468	1.86653	2.15268	0	0.0166196	0.0352335	0.03125	0.0637019	0	3.22024e-06	0.000135642	0.03125	0.033125
TT	Taenia tecta	OLF	307	3	1.44423	98	208	159	4.11197	2.49188	4.49392	2.12311	3.89045	1.95629	2.56457	2.55463	2.46647	2.63021	1.64329	2.20529	0	0.000918261	0.00304174	0.03125	0.0637019	1	2.13343e-05	0.000265298	0.03125	0.033125
DP	Dorsal peduncular area	OLF	310	3	0.501812	164	218	164	3.5924	3.84498	5.97007	3.5924	4.16679	3.45112	3.75774	2.99207	3.4069	4.47262	2.48325	3.12191	1	0.000129762	0.000625219	0.03125	0.0637019	0	7.00787e-05	0.000265298	0.03125	0.033125
PIR	Piriform area	OLF	311	3	11.5657	106	203	186	3.51319	1.04671	3.92507	1.10627	3.41037	1.71412	7.22536	5.38979	4.79134	5.60114	4.46175	7.04242	0	0.00586379	0.015539	0.03125	0.0637019	0	6.32738e-05	0.000265298	0.03125	0.033125
NLOT	Nucleus of the lateral olfactory tract	OLF	312	3	0.318672	149	228	200	3.17767	-0.339627	1.86223	0.158641	2.48997	1.19987	5.64595	0.0538731	0.924367	3.69764	2.12435	4.697	0	0.0495691	0.0847472	0.09375	0.141964	0	0.0241444	0.0266595	0.03125	0.033125
COA	Cortical amygdalar area	OLF	316	3	3.26505	97	231	183	1.86158	0.117378	2.38942	1.61274	3.22014	1.83646	9.67455	2.50462	1.85913	9.33688	3.96937	7.71724	0	0.00697259	0.0167976	0.03125	0.0637019	0	0.00935016	0.0127066	0.03125	0.033125
PAA	Piriform-amygdalar area	OLF	321	3	1.19125	89	218	171	2.51594	-1.67114	4.05989	2.89193	4.70523	1.34798	6.95101	1.73158	1.1072	5.70545	2.71022	5.52799	0	0.0557281	0.0891568	0.09375	0.141964	0	0.0101703	0.0134756	0.03125	0.033125
TR	Postpiriform transition area	OLF	322	3	1.39856	168	236	211	1.53695	-1.52627	1.15795	-0.397236	1.45743	-1.52627	4.66335	1.64836	1.05157	4.08006	2.14606	3.95736	0	0.851331	0.867703	0.9375	0.974265	0	0.00491343	0.00744034	0.03125	0.033125
MO	Somatomotor areas	Isocortex	13	4	24.4574	31	157	90	-0.178919	-1.07322	0.757606	-1.07322	1.3571	2.07986	4.88216	3.5571	3.28106	4.73886	3.42927	4.26666	0	0.58367	0.644469	0.65625	0.740027	0	3.17869e-05	0.000265298	0.03125	0.033125
SS	Somatosensory areas	Isocortex	26	4	33.3322	24	128	100	-0.417635	-1.18823	-2.35409	-1.18823	1.69973	1.36212	10.4288	6.72819	5.96305	9.55832	7.44905	9.69497	0	0.614021	0.664145	0.8125	0.878827	0	0.000102363	0.00033245	0.03125	0.033125
GU	Gustatory areas	Isocortex	84	4	1.76869	0	156	117	1.14455	0.706609	0.0893649	0.0893649	3.66889	3.15667	6.27326	4.01869	3.4434	5.41432	3.88948	5.63509	0	0.0683735	0.0979405	0.03125	0.0637019	0	0.000151887	0.000423686	0.03125	0.033125
VISC	Visceral area	Isocortex	91	4	2.35342	17	173	131	-0.950658	-0.950658	-0.950658	-0.950658	1.57114	1.57114	5.63352	2.96029	1.76136	4.82582	3.60285	4.93329	1	0.844163	0.867703	0.8125	0.878827	0	0.00112462	0.00205535	0.03125	0.033125
AUD	Auditory areas	Isocortex	98	4	5.80086	1	147	153	1.76059	0.3642	2.15772	-0.0846384	1.76059	-0.0846384	4.11114	3.02256	2.69227	4.20985	2.52408	3.66525	0	0.0663975	0.0977519	0.15625	0.21234	0	9.21301e-05	0.000325526	0.03125	0.033125
VIS	Visual areas	Isocortex	127	4	13.4591	8	133	140	0.801618	-1.05576	0.384681	0.674335	1.0412	0.650493	3.50701	2.6083	2.38852	3.32033	2.23954	3.48827	1	0.233376	0.294498	0.4375	0.526989	0	6.05043e-05	0.000265298	0.03125	0.033125
ACA	Anterior cingulate area	Isocortex	184	4	5.53983	64	166	102	1.6306	0.333712	1.26764	-1.71445	1.9334	2.26859	2.94052	2.14611	2.02207	2.99947	2.07548	2.73102	0	0.172146	0.233942	0.21875	0.289844	0	4.11436e-05	0.000265298	0.03125	0.033125
PL	Prelimbic area	Isocortex	197	4	2.40823	47	168	80	3.16579	-0.845621	3.62422	-0.271543	3.39589	2.18439	3.64106	2.61205	2.32608	3.29793	2.22574	2.58434	0	0.0657382	0.0977519	0.15625	0.21234	0	6.85593e-05	0.000265298	0.03125	0.033125
ILA	Infralimbic area	Isocortex	203	4	0.843172	89	179	99	4.72767	3.17545	5.83751	3.73565	5.30433	4.02951	2.77997	2.45708	2.58565	2.86563	1.64412	2.02791	0	0.000112934	0.000625219	0.03125	0.0637019	0	5.92482e-05	0.000265298	0.03125	0.033125
ORB	Orbital area	Isocortex	209	4	5.90188	36	138	94	1.70776	0.45614	2.47771	1.35969	2.41452	1.86912	3.63737	2.39071	2.38718	3.44268	2.41749	2.97764	0	0.00249823	0.00696875	0.03125	0.0637019	0	5.88716e-05	0.000265298	0.03125	0.033125
AI	Agranular insular area	Isocortex	228	4	7.89742	33	152	102	1.29428	-1.20407	0.740612	0.740612	2.83612	3.32522	4.13463	2.35065	2.20396	3.58111	2.40202	3.62562	0	0.111275	0.155199	0.15625	0.21234	0	0.000276863	0.000666989	0.03125	0.033125
RSP	Retrosplenial area	Isocortex	247	4	10.501	26	166	152	0.761879	-0.435642	1.13402	0.189686	1.07402	1.19827	3.61828	2.34488	2.0954	3.53035	2.68246	3.45159	0	0.057195	0.0891568	0.09375	0.141964	0	0.000112908	0.00033245	0.03125	0.033125
PTLp	Posterior parietal association areas	Isocortex	266	4	2.454	0	159	172	0.600034	-1.85427	0.14713	-1.08002	1.37428	-1.85427	2.10259	3.21423	3.02011	2.14935	-0.286534	0.699346	0	0.456915	0.538144	0.53125	0.625694	0	0.0222334	0.0250717	0.0625	0.0637019
TEa	Temporal association areas	Isocortex	281	4	3.10627	21	176	179	1.94236	-0.366339	2.43099	0.603541	2.1294	1.00716	3.50664	2.38915	2.23918	3.35367	2.15203	3.33812	0	0.0316917	0.0579194	0.0625	0.103516	0	0.000109098	0.00033245	0.03125	0.033125
ECT	Ectorhinal area	Isocortex	294	4	1.71188	13	159	145	2.13012	-0.252287	2.52667	0.717283	2.07351	1.16476	3.23728	2.70412	2.87619	3.17588	2.29704	2.93824	0	0.0226458	0.0461625	0.0625	0.103516	0	5.11857e-06	0.000135642	0.03125	0.033125
FRP	Frontal pole, cerebral cortex	Isocortex	7	4	0.972297	38	143	69	-0.707107	-0.707107	5.42943	-0.707107	1.9697	-0.707107	3.29514	2.61108	2.19876	1.74822	0.948173	-0.841011	1	0.493105	0.568143	1	1	0	0.0385473	0.0392885	0.0625	0.0637019
HIP	Hippocampal region	HPF	324	5	23.7319	126	208	75	1.26025	-0.372352	0.749612	0.727848	1.68326	1.30206	8.22325	3.21757	2.87474	7.83338	3.43146	5.86279	0	0.0286358	0.0542035	0.0625	0.103516	0	0.00310698	0.00504383	0.03125	0.033125
RHP	Retrohippocampal region	HPF	335	5	18.494	50	184	37	2.101	1.52739	2.44042	0.744913	1.54048	1.03603	5.46172	3.68339	3.87794	5.1495	3.39019	4.96263	0	0.00177977	0.00554869	0.03125	0.0637019	0	6.02753e-05	0.000265298	0.03125	0.033125
CTXsp	Cortical subplate	CTXsp	356	6	8.90584	138	218	135	1.99718	0.055771	0.817502	0.984176	2.60734	1.85208	6.57863	3.00316	2.84758	6.07949	3.4451	5.13323	0	0.0148322	0.0327545	0.03125	0.0637019	0	0.0010611	0.0020152	0.03125	0.033125
DORsm	Thalamus, sensory-motor cortex related	TH	412	7	6.67772	255	128	132	0.132833	-1.44615	-0.102473	0.728312	1.72584	1.98406	8.44297	3.56456	2.53681	7.95403	3.60752	6.01826	0	0.375283	0.452046	0.3125	0.394345	0	0.00326437	0.00508857	0.03125	0.033125
DORpm	Thalamus, polymodal association cortex related	TH	436	7	12.6798	255	144	159	1.32648	0.511599	1.34317	1.1051	1.90668	2.16862	8.27184	4.20835	3.26183	7.06185	4.00871	6.66542	0	0.00214774	0.0063239	0.03125	0.0637019	0	0.00106464	0.0020152	0.03125	0.033125
PVZ	Periventricular zone	HY	479	8	0.778188	255	93	80	3.97668	3.4129	3.84207	3.95818	4.31556	4.2942	8.42667	2.16296	0.66048	7.7714	2.78187	4.29502	0	8.7413e-07	2.59505e-05	0.03125	0.0637019	0	0.0193105	0.0227435	0.03125	0.033125
PVR	Periventricular region	HY	486	8	2.04972	255	85	71	5.67654	3.50007	5.5544	5.25268	5.97712	5.50515	9.12963	3.06361	1.67982	7.5291	1.32472	5.31844	1	2.82649e-05	0.000299608	0.03125	0.0637019	0	0.0159067	0.0196059	0.03125	0.033125
MEZ	Hypothalamic medial zone	HY	503	8	3.84598	255	76	62	2.97461	-0.0190514	3.3292	2.11173	3.74886	4.04085	6.10018	1.4808	1.08389	5.1445	1.83507	3.61578	0	0.00680725	0.0167976	0.0625	0.103516	0	0.0129199	0.0163037	0.03125	0.033125
LZ	Hypothalamic lateral zone	HY	523	8	5.68622	242	72	59	2.39678	1.71697	2.54412	2.99923	3.13207	2.76005	5.42682	1.96988	1.2021	4.73284	0.904608	3.17875	0	5.83906e-05	0.0004421	0.03125	0.0637019	0	0.0126972	0.0163037	0.03125	0.033125
MBsen	Midbrain, sensory related	MB	536	9	6.85923	255	122	255	-0.497956	-1.43214	0.0532364	0.456561	0.446558	0.869083	2.40084	0.483877	0.547366	1.60108	0.136345	2.07707	0	0.961044	0.961044	1	1	0	0.0257022	0.0278003	0.03125	0.033125
MBmot	Midbrain, motor related	MB	550	9	21.2957	255	144	255	0.475506	0.0691764	-1.13986	1.02311	0.713602	1.79056	4.08858	1.26465	0.772602	3.71748	0.549695	3.26248	0	0.27888	0.343736	0.3125	0.394345	0	0.0170667	0.0205576	0.03125	0.033125
MBsta	Midbrain, behavioral state related	MB	586	9	1.82331	255	144	255	2.01379	2.74033	1.49384	2.01379	3.25264	3.76861	10.1731	2.99494	0.694724	9.76724	2.2023	7.29056	0	0.000780837	0.00275896	0.03125	0.0637019	0	0.0212604	0.0244956	0.03125	0.033125
P-sen	Pons, sensory related	P	605	10	3.84303	255	174	111	0.125994	0.567623	0.910177	3.12132	2.44125	2.69576	7.19456	0.548079	0.548079	6.31662	1.7202	5.49029	0	0.0240524	0.0472139	0.03125	0.0637019	0	0.0324186	0.0336899	0.03125	0.033125
P-mot	Pons, motor related	P	614	10	5.79327	255	186	134	-0.00536792	-1.41304	-1.12603	0.740799	0.719528	0.531717	3.86916	1.42146	0.568728	3.13567	1.35374	3.51962	0	0.822746	0.867703	0.84375	0.894375	0	0.00892091	0.0124423	0.03125	0.033125
P-sat	Pons, behavioral state related	P	629	10	3.45681	255	195	149	1.05715	0.90994	0.868009	1.05715	1.03458	1.05715	4.41182	1.46067	0.870611	4.34783	1.61415	3.83759	1	9.79263e-07	2.59505e-05	0.03125	0.0637019	0	0.00856124	0.0123579	0.03125	0.033125
MY-sen	Medulla, sensory related	MY	639	11	7.93606	255	165	210	1.68198	1.64453	2.47003	2.1932	2.23729	3.04597	4.20616	1.09033	0.900334	3.60009	1.84592	2.09893	0	0.000143785	0.000635051	0.03125	0.0637019	0	0.00862723	0.0123579	0.03125	0.033125
MY-mot	Medulla, motor related	MY	654	11	17.4901	255	179	217	0.671071	0.48964	0.903865	0.638983	1.22302	1.05652	6.24226	2.4579	2.40835	5.80441	2.91671	3.6353	0	0.000757613	0.00275896	0.03125	0.0637019	0	0.00244163	0.00431355	0.03125	0.033125
MY-sat	Medulla, behavioral state related	MY	692	11	0.22575	255	198	226	3.02104	0.654654	0.654654	-0.654654	3.02104	-0.654654	6.25425	5.20952	5.97361	5.55945	4.00216	3.94532	0	0.198869	0.257074	0.34375	0.423692	0	5.09414e-05	0.000265298	0.03125	0.033125
CB	Cerebellum	CB	696	12	53.8293	240	240	128	0.170254	0.867068	1.06705	0.353263	0.989645	1.35056	3.30971	-1.65108	-1.03884	4.10034	0.920325	2.11425	0	0.007319	0.0168655	0.03125	0.0637019	0	0.230249	0.230249	0.3125	0.3125
