# Supplementary material for: Comparative brain-wide mapping of ketamine- and isoflurane-activated nuclei and functional networks in the mouse brain
Source: eLife. 2024 Mar 21;12:RP88420. doi: 10.7554/eLife.88420 (PMC10957177; doi:10.7554/eLife.88420)
Supplement: Figure 5—source data 1. [file elife-88420-fig5-data1.xlsx]

## Sheet: Sheet1
Figure 5—source data 1. Hierarchical clustering of 53 brain regions based on log-relative c-Fos density responses to KET and ISO treatments, related to Figure 5A.
Name	Group	ID	GroupID	Volume	ISOCluster	ISOOrder	KetCluster	KetOrder	Color_1	Color_2	Color_3	HomeCage_1	HomeCage_2	HomeCage_3	HomeCage_4	HomeCage_5	HomeCage_6	ISO_1	ISO_2	ISO_3	ISO_4	ISO_5	ISO_6	Saline_1	Saline_2	Saline_3	Saline_4	Saline_5	Saline_6	Saline_7	Saline_8	Ket_1	Ket_2	Ket_3	Ket_4	Ket_5	Ket_6
PALd	PAL	395	1	1.98772	3	35	3	43	133	153	204	0.352183	-0.425969	0.0511525	0.0511525	-0.124939	-0.425969	0.0511525	-0.425969	-0.425969	0.176091	-0.124939	-0.124939	-0.148063	-0.750123	-0.750123	0.363821	0.50515	-0.750123	-0.273001	-0.148063	1.96504	0.89333	0.396006	2.5976	1.33266	1.67639
PALv	PAL	398	1	3.39242	2	22	3	45	162	177	216	0.211419	-0.691671	-0.691671	0.0864805	-0.0896108	0.286053	1.14718	0.575501	0.985023	0.630549	1.06038	1.03668	-0.129236	-1.17063	0.108125	-0.0737184	0.341255	0.191099	-0.149439	-0.216386	2.4554	1.36467	1.42432	1.99343	1.17278	2.04909
PALm	PAL	401	1	1.50986	2	24	4	20	150	167	211	-0.676694	-0.199572	-0.278754	0.323306	-0.278754	0.30103	0.807606	0.54079	1	0.566344	1.12608	0.971666	-0.0172175	-1.5487	0.314626	-0.247666	-0.293424	0.410345	0.00760605	-0.548696	2.12359	1.30984	1.13073	1.89331	0.813031	1.61625
PALc	PAL	406	1	1.34805	2	28	2	7	179	192	223	-0.0817327	-0.600247	-0.558854	0.372881	-0.0320449	0.132147	1.12892	0.772665	1.0157	0.840662	1.09785	1.20253	0.260618	-1.8886	0.201304	0.0458978	-0.934358	0.435682	-0.473627	-0.546178	1.6389	0.703576	0.284586	1.7649	0.425267	1.11787
STRd	STR	372	2	26.0193	4	4	3	47	152	214	249	0.101458	-0.500602	-1.27875	0.364699	-0.102662	0.101458	0.660766	-0.237361	-0.16481	0.323306	1.09046	0.762639	-0.0265922	-0.566206	0.0904398	-0.28097	0.332989	0.308855	-0.180855	-0.73461	2.34753	1.3996	1.21324	2.55411	1.51619	1.84913
STRv	STR	374	2	8.64909	2	31	3	49	128	205	248	-0.0734289	-0.875061	-0.352183	0.338014	0.0627908	0.0949755	1.09498	0.685244	1.43172	0.99221	1.4614	1.1057	-0.427662	-1.80787	0.51019	-0.360715	-0.962775	0.13661	0.325666	-0.46545	2.35451	1.60976	1.71051	2.16834	1.34165	2.10056
LSX	STR	378	2	3.56273	2	23	2	12	144	203	237	-0.120973	-0.539116	-0.819943	0.545205	-0.317267	-0.0904832	0.960833	0.506021	1.07012	0.832392	0.897577	1.11133	0.168865	-2.48144	0.170804	-0.277323	-0.444016	0.553987	-0.245914	-2.48144	1.33533	0.630827	0.578121	1.26167	0.429182	1.02384
sAMY	STR	385	2	4.04783	2	34	2	1	128	192	226	-0.117386	-0.218056	-0.801632	0.4496	0.160579	-0.676694	1.28413	0.857967	1.25209	1.30896	1.4954	1.51713	0.127272	-0.290503	-0.229981	-0.474788	-0.0365852	0.43293	0.119446	-0.556458	1.79228	0.162987	-0.105043	1.60851	0.614612	1.09775
MOB	OLF	301	3	16.4632	4	12	4	35	154	210	189	-0.273878	-1.31527	0.0649408	0.275794	-1.31527	0.365971	0.863707	-1.31527	1.20456	0.920258	1.50097	0.927768	-0.0424489	-2.18858	0.331251	-1.23433	-0.933304	-0.229536	0.620309	-2.18858	1.96712	1.6837	1.59303	0.509524	0.720979	0.904144
AOB	OLF	302	3	0.651531	3	39	4	36	157	240	210	-0.477121	-0.778151	-0.778151	0.564271	-0.778151	0.176091	-0.778151	-0.778151	0.583577	0.263241	1.41775	0.425969	-0.381341	-1.28443	0.486421	-0.284431	-1.28443	-0.205249	0.507961	-1.28443	1.70768	1.72587	1.79475	0.861697	0.306634	1.05799
AON	OLF	306	3	4.8697	4	13	4	37	84	191	148	-0.622674	-0.701856	0.32345	0.370026	-0.400826	-0.145553	0.847148	0.0762956	1.1016	-0.0206145	1.12422	0.232643	0.464187	-2.10166	0.47121	-0.369267	-1.10166	0.0286726	-0.269152	-2.10166	1.89559	1.6104	1.47858	1.40888	1.19632	1.47514
TT	OLF	307	3	1.44423	2	26	4	39	98	208	159	-0.129439	-0.60656	-0.129439	0.424848	-0.167228	-0.0325292	1.12984	0.642638	1.2447	0.531742	1.06322	0.481576	0.310529	-1.7065	0.643744	-0.560376	-1.10444	-0.405474	-0.11544	-1.7065	1.51673	1.5086	1.43651	1.57042	0.763318	1.22291
DP	OLF	310	3	0.501812	2	32	4	25	164	218	164	0	-0.30103	-0.30103	0.176091	0.30103	-0.30103	0.812913	0.875061	1.39794	0.812913	0.954243	0.778151	0.215858	-0.960233	0.471131	-0.483112	-0.659203	-0.261263	0.318521	-0.960233	1.71555	1.30694	1.52832	2.09705	1.0354	1.37623
PIR	OLF	311	3	11.5657	2	27	4	22	106	203	186	-0.077166	-0.855317	-0.320204	0.514429	-0.0669468	-0.378196	1.25044	0.234083	1.42016	0.258626	1.20807	0.5091	0.160584	-0.301325	0.0249219	-0.287389	-0.122098	0.408829	-0.10675	-0.423128	1.76142	1.29342	1.14083	1.3473	1.0568	1.71478
NLOT	OLF	312	3	0.318672	4	19	2	2	149	228	200	-0.30103	-0.124939	-0.30103	0.544068	-0.30103	-0.60206	0.942008	-0.30103	0.477121	-0.124939	0.69897	0.243038	0.262467	-0.80448	-0.0511525	-0.327359	0.408595	-0.240209	-0.135473	-0.10551	1.82831	-0.10551	0.19552	1.15456	0.610493	1.50015
COA	OLF	316	3	3.26505	4	1	2	4	97	231	183	0.0791812	-0.19382	-0.79588	0.0791812	0.380211	-0.39794	0.565848	-0.09691	0.766413	0.471292	1.08207	0.556303	0.0956699	-0.180536	-0.0359431	-0.348659	-0.051595	0.33586	0.0315524	-0.225699	1.8693	0.448798	0.320912	1.8024	0.738994	1.48152
PAA	OLF	321	3	1.19125	4	14	2	6	89	218	171	-0.199572	-0.199572	-0.500602	0.101458	0.277549	0.101458	0.578579	-0.500602	0.976519	0.675489	1.14285	0.277549	0.103328	-0.264649	-0.285838	-0.331596	-0.0186668	0.438437	0.066344	-0.472925	1.83899	0.386259	0.212472	1.49231	0.658644	1.44292
TR	OLF	322	3	1.39856	1	52	2	5	168	236	211	-0.09691	-0.251812	-1.09691	0.526339	0.0170333	-0.79588	0.536558	-1.09691	0.334454	-0.49485	0.494155	-1.09691	-0.0619834	0.0504388	-0.529345	-0.927285	-0.450164	0.595594	-0.591493	0.0188398	1.85183	0.50139	0.234083	1.59057	0.724316	1.53561
MO	Isocortex	13	4	24.4574	3	37	3	51	31	157	90	0.358257	-0.897016	-0.143688	0.169931	-0.419895	0.00607415	-0.228009	-0.595986	0.157342	-0.595986	0.404014	0.70141	0.431769	-1.17246	0.20412	-0.456454	-0.155424	-0.456454	0.338088	-1.26937	2.65527	1.84857	1.68051	2.56803	1.77074	2.28056
SS	Isocortex	26	4	33.3322	3	49	3	53	24	128	100	0.433656	-0.60206	-1.14613	0.0579919	0.0843209	-0.216709	-0.447158	-0.845098	-1.44716	-0.845098	0.646264	0.47192	-0.155505	-0.556905	-0.0410314	-0.331596	0.350506	0.335189	-0.206657	-0.206657	2.94791	1.86582	1.64208	2.69338	2.0766	2.73333
GU	Isocortex	84	4	1.76869	4	5	3	52	0	156	117	0.330993	-0.367977	-0.367977	0.109144	0.109144	-0.367977	0.234083	0.109144	-0.0669468	-0.0669468	0.954243	0.808114	-0.0700379	-0.769008	0.407083	-0.166948	-0.769008	0.37712	0.00914338	-0.769008	2.69993	1.65095	1.38328	2.30029	1.59083	2.40301
VISC	Isocortex	91	4	2.35342	3	36	3	44	17	173	131	0.0791812	-0.221849	-0.221849	0.255273	0.0791812	-0.221849	-0.221849	-0.221849	-0.221849	-0.221849	0.255273	0.255273	0.32257	-1.16879	-0.691671	-0.323694	0.293606	0.362687	-0.566732	-0.21455	2.66873	1.28453	0.663717	2.2505	1.61725	2.30615
AUD	Isocortex	98	4	5.80086	4	20	4	23	1	147	153	0.321233	-0.720159	-1.02119	-0.0669468	0.154902	0.124939	0.669007	-0.0211893	0.865301	-0.243038	0.669007	-0.243038	-0.41985	0.241148	-0.956409	-0.638345	-0.682251	0.628826	-0.30127	-0.240405	1.68882	1.16324	1.00378	1.73647	0.922573	1.47354
VIS	Isocortex	127	4	13.4591	3	38	4	24	8	133	140	-0.469003	-1.42325	-0.946125	0.540542	0.229967	-0.469003	0.108233	-1.12222	-0.167973	0.0239122	0.26695	0.00811789	0.166763	0.372331	-0.876867	-1.03602	-0.783923	0.460138	-0.80016	-0.129385	1.68211	1.1669	1.0409	1.57509	0.955497	1.67137
ACA	Isocortex	184	4	5.53983	3	42	3	46	64	166	102	0.403692	-0.875061	-0.39794	0.166331	-0.273001	-0.0299632	0.50515	-0.0299632	0.355388	-0.875061	0.630089	0.768391	0.673072	-2.00271	-0.170197	-0.349493	-0.961313	0.0465121	-0.0342229	-2.00271	2.08525	1.35978	1.24649	2.13909	1.29527	1.89393
PL	Isocortex	197	4	2.40823	4	15	4	26	47	168	80	0.249877	-0.653213	-0.0511525	-0.176091	-0.176091	0.249877	0.878266	-0.352183	1.01889	-0.176091	0.948847	0.577236	0.325666	-1.50684	0.406971	-0.330752	-0.184624	0.241345	-0.3929	-1.50684	2.23257	1.49748	1.29319	1.98745	1.22151	1.47768
ILA	Isocortex	203	4	0.843172	2	33	4	40	89	179	99	-0.278754	-0.375664	-0.132626	0.402488	-0.0746336	-0.0234811	1.08673	0.703518	1.36073	0.84182	1.2291	0.914371	0.00265624	-1.61013	0.565964	-0.331374	-0.267705	-0.14773	0.189213	-1.61013	1.67385	1.43284	1.52881	1.73779	0.826035	1.11251
ORB	Isocortex	209	4	5.90188	4	2	3	50	36	138	94	-0.0511525	-0.431364	-0.829304	0.44945	0.0457575	-0.176091	0.513119	0.0157943	0.819056	0.374816	0.793946	0.577236	0.560869	-1.73139	0.293919	-0.585259	-0.351176	-0.0781748	-0.0879346	-1.73139	2.45602	1.45529	1.45245	2.29974	1.47679	1.92643
AI	Isocortex	228	4	7.89742	3	44	3	48	33	152	102	-0.0280287	-0.124939	-0.425969	0.352183	0.118099	-0.425969	0.273001	-0.425969	0.118099	0.118099	0.704365	0.841203	0.101771	-1.76155	-0.128084	0.0377886	0.0308397	0.512606	-0.381341	-0.858462	2.44039	1.25548	1.15805	2.07274	1.2896	2.10231
RSP	Isocortex	247	4	10.501	3	40	4	21	26	166	152	-0.522879	-1.66901	-0.492916	0.464532	0.280383	-0.271067	0.157068	-0.669007	0.413779	-0.237643	0.372386	0.458098	0.35458	0.345872	-0.918286	-1.32131	-0.827479	0.337547	-0.390387	-0.207363	1.87479	1.09943	0.94752	1.82125	1.30497	1.77329
PTLp	Isocortex	266	4	2.454	1	53	1	41	0	159	172	-0.0102192	-0.855317	-0.378196	0.223864	0.290811	-0.077166	0.0989253	-0.855317	-0.077166	-0.554287	0.399955	-0.855317	-0.979624	0.622436	-0.342802	-1.45675	-1.45675	-0.456745	0.123038	0.176723	1.04976	1.85395	1.71352	1.08358	-0.678594	0.0346162
TEa	Isocortex	281	4	3.10627	4	17	4	28	21	176	179	-0.0321847	-1.14613	-0.845098	0.330993	0.39794	-0.669007	0.822355	-0.544068	1.11155	0.0299632	0.933053	0.268845	-0.273472	0.26908	-0.329953	-1.04116	-0.886256	0.598044	-0.550464	-0.170252	1.50048	0.927325	0.850406	1.42202	0.805709	1.41405
ECT	Isocortex	294	4	1.71188	4	18	4	34	13	159	145	0.0173741	-1.21307	-1.21307	0.477121	0.234083	-0.912045	1.05174	-0.611015	1.3285	0.0656788	1.01223	0.37799	-0.217371	0.274349	-0.112371	-0.943135	-0.767043	0.401079	-0.192136	0.112383	1.25024	1.0146	1.09065	1.22311	0.834687	1.11808
FRP	Isocortex	7	4	0.972297	4	21	1	42	38	143	69	0.255273	-0.221849	-0.221849	-0.221849	-0.221849	0.255273	-0.221849	-0.221849	1.15836	-0.221849	0.380211	-0.221849	-0.852785	-0.852785	0.652365	-0.852785	0.101458	-0.551755	0.147215	-0.852785	1.45897	1.07663	0.846185	0.594373	0.147215	-0.852785
HIP	HPF	324	5	23.7319	3	43	4	29	126	208	75	-0.199782	-1.63515	-0.593756	0.00334074	0.410174	0.179432	0.540218	-0.555967	0.19736	0.182747	0.824244	0.568292	0.241898	-0.125143	-0.515947	-0.0442212	-0.0972779	0.252992	-0.139776	-0.00779191	1.8111	0.675524	0.597748	1.72266	0.724047	1.27561
RHP	HPF	335	5	18.494	4	16	4	27	50	184	37	-0.399804	-1.1922	-0.777222	0.366513	0.382992	-0.20097	0.895586	0.568227	1.08929	0.121672	0.575702	0.287811	0.0989718	0.137784	-0.219633	-0.776705	-0.642623	0.33367	-0.288935	0.231079	1.95937	1.27555	1.35037	1.83931	1.16281	1.76746
CTXsp	CTXsp	356	6	8.90584	4	7	4	31	138	218	135	0.0861861	-0.612784	-0.382335	0.4166	0.0861861	-0.533603	0.594042	-0.135663	0.150644	0.213291	0.823379	0.539504	0.138125	-0.273818	-0.35153	-0.139775	-0.231757	0.461383	0.0487513	-0.488368	1.78073	0.756047	0.711458	1.63769	0.8827	1.3665
DORsm	TH	412	7	6.67772	3	47	4	30	255	128	132	0.152377	-1.0607	-0.458638	0.186457	0.247511	-0.0754211	-0.106455	-0.838849	-0.2156	0.169751	0.632443	0.752216	0.194644	0.0611052	-0.257654	-0.407416	-0.18302	0.200984	0.15101	-0.168043	1.7844	0.723863	0.500438	1.67811	0.733203	1.25728
DORpm	TH	436	7	12.6798	4	9	4	32	255	144	159	0.0248236	-0.524848	-0.843137	0.255179	0.177493	0.0772117	0.395519	0.0672274	0.402242	0.306331	0.629263	0.734789	0.264763	-0.2773	-0.170692	-0.0175747	-0.0166128	0.207345	0.0315402	-0.459564	1.81308	0.89551	0.68178	1.53985	0.850432	1.45033
PVZ	HY	479	8	0.778188	2	29	2	13	255	93	80	0.0791812	-0.0940622	-0.625541	0.338247	-0.138875	-0.0692386	1.06465	0.901659	1.02574	1.0593	1.16263	1.15645	0.090878	-0.286307	0.0528133	0.227798	-0.0230653	-0.0270315	0.0393457	-0.348455	1.48418	0.355498	0.0847611	1.3661	0.467021	0.739681
PVR	HY	486	8	2.04972	4	3	2	16	255	85	71	0.141329	-0.0603162	-0.198619	0.0444191	-0.106561	0.0870634	0.65034	0.395067	0.636014	0.600626	0.685594	0.630238	0.202613	-0.110316	0.114624	-0.0404246	-0.228415	0.14246	-0.0723836	-0.228415	1.38613	0.446848	0.232577	1.1383	0.177593	0.795994
MEZ	HY	503	8	3.84598	4	8	2	14	255	76	62	0.185561	-0.247851	-0.266737	0.0366993	0.0461924	0.064578	0.469217	-0.0334586	0.528757	0.324328	0.599222	0.648252	0.352684	-0.30654	-0.20437	-0.0549152	-0.21939	0.255176	-0.0454267	-0.352471	1.39296	0.283685	0.188372	1.16347	0.368758	0.796368
LZ	HY	523	8	5.68622	2	25	2	17	242	72	59	-0.0866742	-0.704722	-0.414688	0.365316	0.104837	0.00284784	0.714407	0.477121	0.765835	0.924687	0.971056	0.841203	0.0360484	-0.207332	-0.093943	-0.188549	-0.57852	0.195855	0.424291	-0.456411	1.55939	0.496885	0.260901	1.34609	0.169466	0.868436
MBsen	MB	536	9	6.85923	3	50	2	18	255	122	255	-1.13108	-1.11918	-0.508403	0.240503	0.455009	-0.0227383	-0.657997	-1.24022	-0.314468	-0.0630982	-0.0693322	0.194004	-0.243208	0.50783	-0.0149087	-0.547419	-1.68096	0.182067	-0.0248602	-0.324933	1.20338	0.0283116	0.0672296	0.713143	-0.184721	1.00492
MBmot	MB	550	9	21.2957	3	48	2	15	255	144	255	-0.276073	-0.801231	-0.273805	0.269617	0.291083	-0.0155268	0.0438669	-0.1084	-0.561471	0.249074	0.13309	0.536666	0.187748	-0.0817915	-0.34654	-0.159102	-0.889014	0.460637	-0.199956	-0.0762722	1.36646	0.327321	0.146262	1.2299	0.0642373	1.06247
MBsta	MB	586	9	1.82331	4	11	2	8	255	144	255	-0.263241	-0.166331	-0.38818	0.32503	0.176091	-0.124939	0.424733	0.604521	0.296067	0.424733	0.731296	0.858974	-0.178669	-0.100782	-0.0347621	0.14869	-0.254759	0.311189	-0.120677	-0.0695242	1.70742	0.476264	0.0817435	1.63781	0.340315	1.21302
P-sen	P	605	10	3.84303	4	6	2	3	255	174	111	-0.115393	0.238882	0.0791812	-0.363178	0.194977	-0.522879	-0.0457575	0.0791812	0.176091	0.801632	0.609239	0.681241	-0.28873	0.159747	0.0644785	0.0303987	-0.756707	0.221016	0.0168962	-0.0314085	2.04602	0.0883906	0.0883906	1.78744	0.433624	1.54405
P-mot	P	614	10	5.79327	3	51	2	10	255	186	134	-0.300359	-0.856662	-0.00336925	-0.441688	0.343824	0.255049	-0.16943	-0.753999	-0.634813	0.140433	0.1316	0.0536068	-0.620588	0.175292	0.15661	-0.0931617	-1.05424	0.302738	0.111382	-0.198206	1.53275	0.466614	0.0951955	1.21326	0.437118	1.3805
P-sat	P	629	10	3.45681	4	10	2	9	255	195	149	0.246129	-1.42597	0.0511525	0.0211893	0.236789	-0.522879	0.393575	0.306425	0.281601	0.393575	0.380211	0.393575	-0.915218	0.200808	-0.35591	0.154819	-0.403335	0.297302	-0.0624335	0.0709933	1.55359	0.429665	0.204944	1.52922	0.488117	1.3349
MY-sen	MY	639	11	7.93606	2	30	2	11	255	165	210	-0.115251	-1.3457	-0.00327771	-0.44261	0.499398	-0.169609	0.679605	0.658621	1.12117	0.966053	0.990759	1.44388	-0.419737	0.563332	-0.125141	-0.628997	-1.10612	0.149154	-0.0819843	-0.180364	1.75044	0.284312	0.194912	1.46526	0.639849	0.758901
MY-mot	MY	654	11	17.4901	3	45	4	33	255	179	217	0.513963	-1.75904	-0.247155	-0.737849	0.236597	-0.61291	0.060506	-0.0732962	0.232188	0.036842	0.467562	0.344766	-0.442247	0.418645	-0.220399	-0.583577	-0.606439	0.0480753	0.0532455	0.21981	2.09681	0.741286	0.723535	1.93997	0.905624	1.16302
MY-sat	MY	692	11	0.22575	3	41	4	38	255	198	226	-0.221849	-0.221849	0.0791812	-0.221849	0.380211	-0.221849	0.623249	0.0791812	0.0791812	-0.221849	0.623249	-0.221849	-0.11115	0.557856	-0.287242	-0.588272	-0.287242	-0.11115	-0.287242	0.0137883	1.81313	1.48728	1.7256	1.59642	1.1107	1.09297
CB	CB	696	12	53.8293	3	46	2	19	240	240	128	0.51491	-0.646458	-0.345428	-0.747916	0.174728	-0.424609	-0.169337	0.143592	0.233402	-0.0871502	0.19864	0.36072	0.321759	-0.161851	-0.546003	-0.670941	-0.808114	0.260601	-0.181921	0.318063	1.23215	-0.889785	-0.627907	1.57034	0.21011	0.720802
