# Supplementary material for: Comparative brain-wide mapping of ketamine- and isoflurane-activated nuclei and functional networks in the mouse brain
Source: eLife. 2024 Mar 21;12:RP88420. doi: 10.7554/eLife.88420 (PMC10957177; doi:10.7554/eLife.88420)
Supplement: Figure 5—source data 2. [file elife-88420-fig5-data2.xlsx]

## Sheet: Figure 5
Figure 5—source data 2. Z values of the log relative c-Fos density in 53 brain regions in response to KET and ISO, related to Figure 5E.
Name	Group	ID	GroupID	Volume	ISOCluster	ISOOrder	KetCluster	KetOrder	Color_1	Color_2	Color_3	ISO_1	ISO_2	ISO_3	ISO_4	ISO_5	ISO_6	Ket_1	Ket_2	Ket_3	Ket_4	Ket_5	Ket_6
PALd	PAL	395	1	1.98772	3	35	3	43	133	153	204	0.249796	-1.76976	-1.65592	0.883188	-0.789751	-0.625227	11.6909	3.71539	1.59338	13.143	6.39123	7.09767
PALv	PAL	398	1	3.39242	2	22	3	45	162	177	216	5.60208	2.39102	3.8292	3.16252	6.70276	5.18784	14.6082	5.67568	5.73094	10.0861	5.62446	8.67564
PALm	PAL	401	1	1.50986	2	24	4	20	150	167	211	3.94383	2.24681	3.88743	2.84051	7.11807	4.86248	12.6341	5.44767	4.54966	9.57958	3.89916	6.84305
PALc	PAL	406	1	1.34805	2	28	2	7	179	192	223	5.51291	3.21017	3.94847	4.21635	6.93965	6.01777	9.7505	2.92619	1.14507	8.92986	2.03951	4.73293
STRd	STR	372	2	26.0193	4	4	3	47	152	214	249	3.22675	-0.986157	-0.640688	1.62155	6.89293	3.81645	13.9664	5.82098	4.88162	12.923	7.27142	7.82902
STRv	STR	374	2	8.64909	2	31	3	49	128	205	248	5.34715	2.84697	5.56571	4.97644	9.23765	5.53322	14.008	6.69506	6.88247	10.9711	6.43435	8.89356
LSX	STR	378	2	3.56273	2	23	2	12	144	203	237	4.69209	2.10235	4.16002	4.17487	5.67368	5.5614	7.94443	2.62363	2.32615	6.38369	2.05828	4.33485
sAMY	STR	385	2	4.04783	2	34	2	1	128	192	226	6.27088	3.56457	4.86739	6.56509	9.45257	7.59211	10.663	0.677868	-0.422654	8.13857	2.94758	4.64777
MOB	OLF	301	3	16.4632	4	12	4	35	154	210	189	4.21779	-5.46452	4.68263	4.61557	9.48779	4.6428	11.7032	7.00254	6.4098	2.57803	3.4577	3.82806
AOB	OLF	302	3	0.651531	3	39	4	36	157	240	210	-3.79999	-3.23296	2.26861	1.32029	8.96174	2.13166	10.1597	7.17794	7.22143	4.35992	1.47057	4.47944
AON	OLF	306	3	4.8697	4	13	4	37	84	191	148	4.13692	0.316983	4.28239	-0.103392	7.10631	1.16421	11.2777	6.6977	5.94927	7.12852	5.73734	6.2456
TT	OLF	307	3	1.44423	2	26	4	39	98	208	159	5.51739	2.66995	4.83867	2.66696	6.72073	2.40993	9.02367	6.27433	5.78	7.94583	3.66074	5.1777
DP	OLF	310	3	0.501812	2	32	4	25	164	218	164	3.96974	3.63559	5.43439	4.07718	6.03187	3.89408	10.2065	5.4356	6.1494	10.6104	4.96562	5.82681
PIR	OLF	311	3	11.5657	2	27	4	22	106	203	186	6.10632	0.972539	5.52076	1.29714	7.63634	2.54767	10.4794	5.37935	4.59029	6.81693	5.06822	7.2602
NLOT	OLF	312	3	0.318672	4	19	2	2	149	228	200	4.60016	-1.25068	1.85477	-0.626632	4.41826	1.21623	10.8774	-0.43882	0.786701	5.84173	2.92782	6.35151
COA	OLF	316	3	3.26505	4	1	2	4	97	231	183	2.76324	-0.402629	2.97937	2.36377	6.83986	2.78389	11.1213	1.86656	1.29123	9.11962	3.54409	6.27262
PAA	OLF	321	3	1.19125	4	14	2	6	89	218	171	2.82541	-2.07984	3.79615	3.38792	7.22408	1.38893	10.9409	1.60646	0.854911	7.55065	3.15875	6.10919
TR	OLF	322	3	1.39856	1	52	2	5	168	236	211	2.62021	-4.5573	1.30016	-2.48193	3.1236	-5.48923	11.0173	2.08529	0.941866	8.0478	3.4737	6.50163
MO	Isocortex	13	4	24.4574	3	37	3	51	31	157	90	-1.11345	-2.47613	0.611655	-2.98917	2.55382	3.51004	15.7973	7.68824	6.76177	12.9935	8.49218	9.65565
SS	Isocortex	26	4	33.3322	3	49	3	53	24	128	100	-2.18363	-3.51111	-5.62572	-4.2386	4.0851	2.36162	17.5384	7.75998	6.60714	13.6277	9.95905	11.5727
GU	Isocortex	84	4	1.76869	4	5	3	52	0	156	117	1.14311	0.45346	-0.260251	-0.335772	6.03187	4.04402	16.063	6.86634	5.56582	11.6388	7.62934	10.1741
VISC	Isocortex	91	4	2.35342	3	36	3	44	17	173	131	-1.08337	-0.921709	-0.862421	-1.11269	1.6136	1.27745	15.8774	5.34238	2.67056	11.3869	7.75606	9.76403
AUD	Isocortex	98	4	5.80086	4	20	4	23	1	147	153	3.267	-0.0880346	3.3638	-1.21896	4.22886	-1.21623	10.0475	4.83796	4.03884	8.78603	4.4245	6.23881
VIS	Isocortex	127	4	13.4591	3	38	4	24	8	133	140	0.52854	-4.66244	-0.652984	0.119932	1.68742	0.0406241	10.0076	4.85316	4.18821	7.96949	4.5824	7.07641
ACA	Isocortex	184	4	5.53983	3	42	3	46	64	166	102	2.46683	-0.124487	1.38154	-4.38888	3.98286	3.84524	12.406	5.65535	5.01544	10.8231	6.21192	8.01872
PL	Isocortex	197	4	2.40823	4	15	4	26	47	168	80	4.28889	-1.4632	3.96084	-0.883188	5.99776	2.88865	13.2825	6.22805	5.20332	10.0559	5.85816	6.25637
ILA	Isocortex	203	4	0.843172	2	33	4	40	89	179	99	5.30691	2.92289	5.28975	4.22216	7.76928	4.57576	9.95844	5.95923	6.15137	8.79267	3.96153	4.71024
ORB	Isocortex	209	4	5.90188	4	2	3	50	36	138	94	2.50574	0.06562	3.18402	1.8799	5.01861	2.88865	14.6119	6.05258	5.84414	11.636	7.08242	8.15633
AI	Isocortex	228	4	7.89742	3	44	3	48	33	152	102	1.33316	-1.76976	0.459102	0.592329	4.45237	4.20961	14.5189	5.22158	4.65957	10.4874	6.18471	8.90096
RSP	Isocortex	247	4	10.501	3	40	4	21	26	166	152	0.767019	-2.7795	1.60853	-1.1919	2.35389	2.29245	11.1539	4.57254	3.81248	9.21496	6.25844	7.50793
PTLp	Isocortex	266	4	2.454	1	53	1	41	0	159	172	0.483087	-3.55356	-0.299977	-2.78003	2.52816	-4.28024	6.24546	7.71062	6.89457	5.4826	-3.25443	0.146562
TEa	Isocortex	281	4	3.10627	4	17	4	28	21	176	179	4.01585	-2.26043	4.32107	0.150281	5.89793	1.34537	8.92698	3.85677	3.42173	7.19501	3.86405	5.98695
ECT	Isocortex	294	4	1.71188	4	18	4	34	13	159	145	5.13603	-2.53857	5.16446	0.329413	6.39844	1.89156	7.43821	4.21976	4.3884	6.18855	4.00302	4.73383
FRP	Isocortex	7	4	0.972297	4	21	1	42	38	143	69	-1.08337	-0.921709	4.50305	-1.11269	2.40336	-1.11019	8.68001	4.47775	3.40474	3.00735	0.706019	-3.61061
HIP	HPF	324	5	23.7319	3	43	4	29	126	208	75	2.63808	-2.30986	0.767224	0.916571	5.21013	2.84389	10.775	2.80952	2.40512	8.71611	3.47241	5.40082
RHP	HPF	335	5	18.494	4	16	4	27	50	184	37	4.37346	2.3608	4.23454	0.610245	3.63907	1.44029	11.6571	5.30507	5.43338	9.30636	5.57666	7.48324
CTXsp	CTXsp	356	6	8.90584	4	7	4	31	138	218	135	2.90092	-0.563634	0.585618	1.06976	5.20466	2.69983	10.5943	3.14442	2.86265	8.28619	4.23328	5.78563
DORsm	TH	412	7	6.67772	3	47	4	30	255	128	132	-0.519859	-3.48514	-0.838128	0.851389	3.99774	3.76429	10.6161	3.01057	2.01358	8.4907	3.51632	5.32321
DORpm	TH	436	7	12.6798	4	9	4	32	255	144	159	1.93146	0.279308	1.56369	1.53641	3.97764	3.67708	10.7867	3.72445	2.74324	7.79117	4.07853	6.14057
PVZ	HY	479	8	0.778188	2	29	2	13	255	93	80	5.19909	3.7461	3.98748	5.31295	7.34909	5.7872	8.82999	1.47853	0.341048	6.91205	2.23975	3.13174
PVR	HY	486	8	2.04972	4	3	2	16	255	85	71	3.17584	1.64137	2.47246	3.01245	4.33371	3.15388	8.24667	1.85845	0.935805	5.75945	0.851704	3.37016
MEZ	HY	503	8	3.84598	4	8	2	14	255	76	62	2.29135	-0.139009	2.0555	1.62667	3.78775	3.24403	8.28729	1.17986	0.757941	5.88678	1.7685	3.37174
LZ	HY	523	8	5.68622	2	25	2	17	242	72	59	3.4887	1.98228	2.97713	4.63778	6.13815	4.20961	9.27747	2.06656	1.04977	6.81083	0.812733	3.67688
MBsen	MB	536	9	6.85923	3	50	2	18	255	122	255	-3.21323	-5.15272	-1.22247	-0.31647	-0.438256	0.97085	7.15943	0.117749	0.270508	3.60828	-0.88589	4.25472
MBmot	MB	550	9	21.2957	3	48	2	15	255	144	255	0.214218	-0.450365	-2.18268	1.24923	0.841276	2.68562	8.12962	1.36134	0.588504	6.22293	0.308071	4.49841
MBsta	MB	586	9	1.82331	4	11	2	8	255	144	255	2.07412	2.51159	1.15094	2.13025	4.6226	4.29854	10.1581	1.98079	0.328906	8.28681	1.63209	5.13582
P-sen	P	605	10	3.84303	4	6	2	3	255	174	111	-0.22345	0.328972	0.684542	4.0206	3.85106	3.40911	12.1726	0.367619	0.355652	9.04389	2.07959	6.53736
P-mot	P	614	10	5.79327	3	51	2	10	255	186	134	-0.827388	-3.13262	-2.46779	0.704345	0.831856	0.268263	9.11894	1.94066	0.383032	6.13874	2.09635	5.84489
P-sat	P	629	10	3.45681	4	10	2	9	255	195	149	1.92197	1.2731	1.0947	1.97398	2.40336	1.96956	9.24295	1.78699	0.824621	7.73737	2.34093	5.65182
MY-sen	MY	639	11	7.93606	2	30	2	11	255	165	210	3.31875	2.73636	4.35846	4.84525	6.26269	7.22557	10.4141	1.18246	0.784256	7.41376	3.06861	3.21311
MY-mot	MY	654	11	17.4901	3	45	4	33	255	179	217	0.295472	-0.304522	0.902614	0.184782	2.95551	1.7253	12.4748	3.08303	2.91125	9.81565	4.34322	4.9241
MY-sat	MY	692	11	0.22575	3	41	4	38	255	198	226	3.04355	0.328972	0.307811	-1.11269	3.93962	-1.11019	10.7871	6.18562	6.94317	8.0774	5.32672	4.62753
CB	CB	696	12	53.8293	3	46	2	19	240	240	128	-0.826932	0.596579	0.907333	-0.437103	1.25562	1.80514	7.33056	-3.70064	-2.52647	7.94542	1.00765	3.05181
