# Supplementary material for: Comparative brain-wide mapping of ketamine- and isoflurane-activated nuclei and functional networks in the mouse brain
Source: eLife. 2024 Mar 21;12:RP88420. doi: 10.7554/eLife.88420 (PMC10957177; doi:10.7554/eLife.88420)
Supplement: Figure 6—source data 1. [file elife-88420-fig6-data1.xlsx]

## Sheet: Sheet1
Figure 6—source data 1. Hierarchical clustering of brain regions based on log-relative c-Fos density responses to KET and ISO treatments, related to Figure 6A.
Name	Group	ID	GroupID	Volume	ISOCluster	ISOOrder	KetCluster	KetOrder	Color_1	Color_2	Color_3	HomeCage_1	HomeCage_2	HomeCage_3	HomeCage_4	HomeCage_5	HomeCage_6	ISO_1	ISO_2	ISO_3	ISO_4	ISO_5	ISO_6	Saline_1	Saline_2	Saline_3	Saline_4	Saline_5	Saline_6	Saline_7	Saline_8	Ket_1	Ket_2	Ket_3	Ket_4	Ket_5	Ket_6
PA	CTX	369	1	0.965953	2	92	3	32	151	236	147	0.39794	-0.30103	0	-0.30103	-0.30103	0	0.845098	0	0.90309	0.60206	0.740363	1.20412	0	-0.285236	-0.829304	-0.829304	-0.732394	0.741823	-0.829304	-0.477121	1.69607	0.0310342	-0.176091	1.47551	0.78612	1.55942
PIR	CTX	311	1	11.5657	2	116	1	162	106	203	186	-0.077166	-0.855317	-0.320204	0.514429	-0.0669468	-0.378196	1.25044	0.234083	1.42016	0.258626	1.20807	0.5091	0.160584	-0.301325	0.0249219	-0.287389	-0.122098	0.408829	-0.10675	-0.423128	1.76142	1.29342	1.14083	1.3473	1.0568	1.71478
DG	CTX	329	1	6.59745	2	141	3	48	126	208	75	-0.488286	-1.51631	-0.578463	-0.0066645	0.445896	0.205221	0.556792	-0.461957	0.318318	0.271382	0.828732	0.684171	0.373536	0.0299243	-0.295801	-0.34465	-0.204471	0.118461	-0.0814081	-0.0758042	1.69145	0.56166	0.59081	1.42865	0.60381	1.106
ENT	CTX	336	1	11.4094	2	118	1	173	50	184	37	-0.314163	-1.29189	-0.551524	0.436467	0.276315	-0.250494	1.00148	0.772571	1.30416	0.147446	0.751476	0.452406	0.147442	0.0756753	-0.249779	-0.848265	-0.651323	0.401835	-0.364082	0.182647	1.96134	1.30065	1.38519	1.85339	1.2371	1.785
MOB	CTX	301	1	16.4632	2	98	1	187	154	210	189	-0.273878	-1.31527	0.0649408	0.275794	-1.31527	0.365971	0.863707	-1.31527	1.20456	0.920258	1.50097	0.927768	-0.0424489	-2.18858	0.331251	-1.23433	-0.933304	-0.229536	0.620309	-2.18858	1.96712	1.6837	1.59303	0.509524	0.720979	0.904144
CA	CTX	325	1	16.9484	2	157	3	60	126	208	75	0.0160693	-1.575	-0.597272	0.0160693	0.354424	0.141008	0.511365	-0.834633	-0.0435164	0.0104654	0.805216	0.336162	0.113322	-0.280711	-0.795032	0.0932436	-0.0294177	0.326184	-0.190332	0.0330934	1.87228	0.740787	0.593052	1.84509	0.792214	1.36104
AON	CTX	306	1	4.8697	2	122	1	189	84	191	148	-0.622674	-0.701856	0.32345	0.370026	-0.400826	-0.145553	0.847148	0.0762956	1.1016	-0.0206145	1.12422	0.232643	0.464187	-2.10166	0.47121	-0.369267	-1.10166	0.0286726	-0.269152	-2.10166	1.89559	1.6104	1.47858	1.40888	1.19632	1.47514
TT	CTX	307	1	1.44423	2	117	1	164	98	208	159	-0.129439	-0.60656	-0.129439	0.424848	-0.167228	-0.0325292	1.12984	0.642638	1.2447	0.531742	1.06322	0.481576	0.310529	-1.7065	0.643744	-0.560376	-1.10444	-0.405474	-0.11544	-1.7065	1.51673	1.5086	1.43651	1.57042	0.763318	1.22291
ECT	CTX	294	1	1.71188	2	123	2	7	13	159	145	0.0173741	-1.21307	-1.21307	0.477121	0.234083	-0.912045	1.05174	-0.611015	1.3285	0.0656788	1.01223	0.37799	-0.217371	0.274349	-0.112371	-0.943135	-0.767043	0.401079	-0.192136	0.112383	1.25024	1.0146	1.09065	1.22311	0.834687	1.11808
RSP	CTX	247	1	10.501	1	26	1	178	26	166	152	-0.522879	-1.66901	-0.492916	0.464532	0.280383	-0.271067	0.157068	-0.669007	0.413779	-0.237643	0.372386	0.458098	0.35458	0.345872	-0.918286	-1.32131	-0.827479	0.337547	-0.390387	-0.207363	1.87479	1.09943	0.94752	1.82125	1.30497	1.77329
ILA	CTX	203	1	0.843172	2	125	1	163	89	179	99	-0.278754	-0.375664	-0.132626	0.402488	-0.0746336	-0.0234811	1.08673	0.703518	1.36073	0.84182	1.2291	0.914371	0.00265624	-1.61013	0.565964	-0.331374	-0.267705	-0.14773	0.189213	-1.61013	1.67385	1.43284	1.52881	1.73779	0.826035	1.11251
SUB	CTX	352	1	2.10358	1	68	1	179	79	194	68	-0.289749	-0.801632	-0.926571	-0.0234811	0.55055	-0.14842	0.706897	0.23976	0.706897	0.0587057	0.328701	-0.0234811	-0.490294	0.474314	-0.0526817	-1.15305	-0.471811	-0.0195134	-0.127746	0.230763	1.88842	1.39521	1.3548	1.7163	0.777387	1.63709
TEa	CTX	281	1	3.10627	2	170	1	168	21	176	179	-0.0321847	-1.14613	-0.845098	0.330993	0.39794	-0.669007	0.822355	-0.544068	1.11155	0.0299632	0.933053	0.268845	-0.273472	0.26908	-0.329953	-1.04116	-0.886256	0.598044	-0.550464	-0.170252	1.50048	0.927325	0.850406	1.42202	0.805709	1.41405
COA	CTX	316	1	3.26505	2	101	3	70	97	231	183	0.0791812	-0.19382	-0.79588	0.0791812	0.380211	-0.39794	0.565848	-0.09691	0.766413	0.471292	1.08207	0.556303	0.0956699	-0.180536	-0.0359431	-0.348659	-0.051595	0.33586	0.0315524	-0.225699	1.8693	0.448798	0.320912	1.8024	0.738994	1.48152
ORB	CTX	209	1	5.90188	2	107	1	192	36	138	94	-0.0511525	-0.431364	-0.829304	0.44945	0.0457575	-0.176091	0.513119	0.0157943	0.819056	0.374816	0.793946	0.577236	0.560869	-1.73139	0.293919	-0.585259	-0.351176	-0.0781748	-0.0879346	-1.73139	2.45602	1.45529	1.45245	2.29974	1.47679	1.92643
SS	CTX	26	1	33.3322	1	81	1	201	24	128	100	0.433656	-0.60206	-1.14613	0.0579919	0.0843209	-0.216709	-0.447158	-0.845098	-1.44716	-0.845098	0.646264	0.47192	-0.155505	-0.556905	-0.0410314	-0.331596	0.350506	0.335189	-0.206657	-0.206657	2.94791	1.86582	1.64208	2.69338	2.0766	2.73333
MO	CTX	13	1	24.4574	1	30	1	197	31	157	90	0.358257	-0.897016	-0.143688	0.169931	-0.419895	0.00607415	-0.228009	-0.595986	0.157342	-0.595986	0.404014	0.70141	0.431769	-1.17246	0.20412	-0.456454	-0.155424	-0.456454	0.338088	-1.26937	2.65527	1.84857	1.68051	2.56803	1.77074	2.28056
VIS	CTX	127	1	13.4591	1	33	1	170	8	133	140	-0.469003	-1.42325	-0.946125	0.540542	0.229967	-0.469003	0.108233	-1.12222	-0.167973	0.0239122	0.26695	0.00811789	0.166763	0.372331	-0.876867	-1.03602	-0.783923	0.460138	-0.80016	-0.129385	1.68211	1.1669	1.0409	1.57509	0.955497	1.67137
PERI	CTX	288	1	0.790078	2	119	1	165	14	150	132	0.399955	-0.855317	-0.554287	0.258626	-0.077166	-0.378196	0.797895	0.445713	1.00202	0.423436	0.944023	0.466902	-0.164167	-0.0258642	-0.186443	-0.921129	-0.921129	0.521575	0.0466865	0.0191029	1.53826	1.27279	1.11057	1.39872	1.14118	1.35925
AUD	CTX	98	1	5.80086	1	70	1	171	1	147	153	0.321233	-0.720159	-1.02119	-0.0669468	0.154902	0.124939	0.669007	-0.0211893	0.865301	-0.243038	0.669007	-0.243038	-0.41985	0.241148	-0.956409	-0.638345	-0.682251	0.628826	-0.30127	-0.240405	1.68882	1.16324	1.00378	1.73647	0.922573	1.47354
AOB	CTX	302	1	0.651531	2	163	1	188	157	240	210	-0.477121	-0.778151	-0.778151	0.564271	-0.778151	0.176091	-0.778151	-0.778151	0.583577	0.263241	1.41775	0.425969	-0.381341	-1.28443	0.486421	-0.284431	-1.28443	-0.205249	0.507961	-1.28443	1.70768	1.72587	1.79475	0.861697	0.306634	1.05799
BMAp	CTX	368	1	0.717328	2	144	3	83	132	234	129	0.210853	-0.20412	-0.30103	0.30103	9.64327e-17	-0.60206	0.439333	0.273001	0.09691	0.30103	0.942008	0.60206	-0.112549	0.0335789	-0.475727	-0.359221	-0.247248	0.344828	0.20967	-0.00988681	1.43604	0.474788	0.150692	1.28655	0.255428	1.27603
TR	CTX	322	1	1.39856	1	79	3	51	168	236	211	-0.09691	-0.251812	-1.09691	0.526339	0.0170333	-0.79588	0.536558	-1.09691	0.334454	-0.49485	0.494155	-1.09691	-0.0619834	0.0504388	-0.529345	-0.927285	-0.450164	0.595594	-0.591493	0.0188398	1.85183	0.50139	0.234083	1.59057	0.724316	1.53561
PL	CTX	197	1	2.40823	2	172	1	174	47	168	80	0.249877	-0.653213	-0.0511525	-0.176091	-0.176091	0.249877	0.878266	-0.352183	1.01889	-0.176091	0.948847	0.577236	0.325666	-1.50684	0.406971	-0.330752	-0.184624	0.241345	-0.3929	-1.50684	2.23257	1.49748	1.29319	1.98745	1.22151	1.47768
ACA	CTX	184	1	5.53983	2	184	1	175	64	166	102	0.403692	-0.875061	-0.39794	0.166331	-0.273001	-0.0299632	0.50515	-0.0299632	0.355388	-0.875061	0.630089	0.768391	0.673072	-2.00271	-0.170197	-0.349493	-0.961313	0.0465121	-0.0342229	-2.00271	2.08525	1.35978	1.24649	2.13909	1.29527	1.89393
LA	CTX	361	1	0.83875	1	28	3	85	144	235	141	-0.0395085	-0.884607	-0.185637	0.394147	0.156786	-0.407485	0.758846	-0.884607	-0.282547	-0.185637	0.606755	0.370666	0.137904	0.170696	-0.455723	-0.365546	-0.268636	0.443171	-0.0645165	-0.724568	1.61132	0.322428	0.256408	1.39365	0.678307	0.537544
DP	CTX	310	1	0.501812	2	126	1	181	164	218	164	0	-0.30103	-0.30103	0.176091	0.30103	-0.30103	0.812913	0.875061	1.39794	0.812913	0.954243	0.778151	0.215858	-0.960233	0.471131	-0.483112	-0.659203	-0.261263	0.318521	-0.960233	1.71555	1.30694	1.52832	2.09705	1.0354	1.37623
PAA	CTX	321	1	1.19125	2	108	3	53	89	218	171	-0.199572	-0.199572	-0.500602	0.101458	0.277549	0.101458	0.578579	-0.500602	0.976519	0.675489	1.14285	0.277549	0.103328	-0.264649	-0.285838	-0.331596	-0.0186668	0.438437	0.066344	-0.472925	1.83899	0.386259	0.212472	1.49231	0.658644	1.44292
POST	CTX	350	1	1.08038	1	38	3	61	72	200	60	-1.09691	-1.09691	-1.09691	0.61066	-0.0555173	-0.09691	-0.39794	-0.19382	-1.09691	0.0791812	0.0170333	-0.09691	0.178624	0.00755314	-0.413452	-0.199572	-0.977724	-0.199572	0.0503051	0.414387	1.78695	0.458969	0.545155	1.65372	0.694374	1.727
AI	CTX	228	1	7.89742	2	147	1	194	33	152	102	-0.0280287	-0.124939	-0.425969	0.352183	0.118099	-0.425969	0.273001	-0.425969	0.118099	0.118099	0.704365	0.841203	0.101771	-1.76155	-0.128084	0.0377886	0.0308397	0.512606	-0.381341	-0.858462	2.44039	1.25548	1.15805	2.07274	1.2896	2.10231
BMAa	CTX	367	1	0.768109	2	143	3	39	132	234	129	0.0621479	0.0621479	-0.636822	0.0621479	0.31742	-0.636822	0.641932	0.363178	-0.335792	0.761118	0.761118	0.363178	0.274701	-0.910936	-0.410333	0.0591013	-0.241929	0.418123	0.043307	-0.785997	1.56425	-0.609906	-0.145019	1.6045	0.991249	1.11709
PAR	CTX	349	1	0.932656	1	78	1	182	114	213	105	-0.522879	-0.522879	-0.522879	-0.522879	0.623249	-0.221849	1.11059	0.255273	0.875061	0.0791812	0.176091	-0.522879	0.136521	-0.364082	-0.142233	-0.297135	-0.665112	0.219495	-0.364082	0.425969	1.97238	0.7151	1.12494	1.92409	0.643097	1.94234
NLOT	CTX	312	1	0.318672	2	176	3	104	149	228	200	-0.30103	-0.124939	-0.30103	0.544068	-0.30103	-0.60206	0.942008	-0.30103	0.477121	-0.124939	0.69897	0.243038	0.262467	-0.80448	-0.0511525	-0.327359	0.408595	-0.240209	-0.135473	-0.10551	1.82831	-0.10551	0.19552	1.15456	0.610493	1.50015
PRE	CTX	351	1	0.923969	2	120	3	66	89	185	71	-0.176091	-0.176091	-0.176091	0.124939	0.30103	-0.176091	1.48667	0.124939	1.02803	0.425969	0.425969	0.778151	-0.0299632	-0.121734	-0.121734	-0.507084	-0.574031	-0.00975984	-0.148063	0.517049	2.02947	0.60206	1.06612	1.85058	0.758407	1.58332
PTLp	CTX	266	1	2.454	1	45	2	17	0	159	172	-0.0102192	-0.855317	-0.378196	0.223864	0.290811	-0.077166	0.0989253	-0.855317	-0.077166	-0.554287	0.399955	-0.855317	-0.979624	0.622436	-0.342802	-1.45675	-1.45675	-0.456745	0.123038	0.176723	1.04976	1.85395	1.71352	1.08358	-0.678594	0.0346162
GU	CTX	84	1	1.76869	2	150	1	198	0	156	117	0.330993	-0.367977	-0.367977	0.109144	0.109144	-0.367977	0.234083	0.109144	-0.0669468	-0.0669468	0.954243	0.808114	-0.0700379	-0.769008	0.407083	-0.166948	-0.769008	0.37712	0.00914338	-0.769008	2.69993	1.65095	1.38328	2.30029	1.59083	2.40301
CLA	CTX	357	1	0.551297	2	187	1	180	138	218	135	0.442359	-0.335792	-0.335792	-0.0347621	-0.335792	-0.0347621	0.266268	-0.335792	0.509306	-0.0347621	0.810336	0.509306	0.271438	-1.31963	-0.416536	0.111737	-0.205683	0.436248	-0.0185965	-1.0186	1.85385	1.1773	1.10198	1.52236	1.19492	1.82867
FRP	CTX	7	1	0.972297	1	73	2	21	38	143	69	0.255273	-0.221849	-0.221849	-0.221849	-0.221849	0.255273	-0.221849	-0.221849	1.15836	-0.221849	0.380211	-0.221849	-0.852785	-0.852785	0.652365	-0.852785	0.101458	-0.551755	0.147215	-0.852785	1.45897	1.07663	0.846185	0.594373	0.147215	-0.852785
IG	CTX	334	1	0.124344	2	145	3	74	126	208	75	-9.64327e-17	-9.64327e-17	-9.64327e-17	-9.64327e-17	-9.64327e-17	-9.64327e-17	0.30103	0.69897	-9.64327e-17	0.60206	1	0.30103	0.162727	-0.439333	-0.138303	-0.439333	-0.439333	0.51491	-0.138303	-0.138303	1.63621	0.706795	0.405765	2.12533	0.706795	1.58186
VISC	CTX	91	1	2.35342	1	31	1	196	17	173	131	0.0791812	-0.221849	-0.221849	0.255273	0.0791812	-0.221849	-0.221849	-0.221849	-0.221849	-0.221849	0.255273	0.255273	0.32257	-1.16879	-0.691671	-0.323694	0.293606	0.362687	-0.566732	-0.21455	2.66873	1.28453	0.663717	2.2505	1.61725	2.30615
FC	CTX	333	1	0.0616719	1	3	3	93	126	208	75	0	0	0	0	0	0	0	0	0	0	0	0	-0.210853	-0.210853	-0.210853	-0.210853	-0.210853	-0.210853	0.266268	0.391207	1.16936	0.0901766	1.16936	1.38021	0.266268	0.488117
BST	CNU	407	2	1.3405	2	129	3	54	179	192	223	-0.0799118	-0.598426	-0.557033	0.374702	-0.030224	0.12585	1.13074	0.774486	1.01752	0.842483	1.09793	1.20435	0.254094	-1.88579	0.200575	0.0487133	-0.931543	0.438497	-0.470812	-0.543362	1.6364	0.706392	0.287401	1.76365	0.428082	1.12025
CEA	CNU	388	2	1.3177	2	198	3	152	128	192	226	-0.418143	-0.221849	-0.78612	0.575608	-0.00796893	-0.962211	1.43919	1.11516	1.48649	1.54766	1.64471	1.73064	-0.242151	-0.371246	0.0588792	-0.242151	0.0199611	0.441668	0.0711136	-0.530946	1.71237	-0.339061	-0.582099	1.34732	0.685073	1.05451
LSr	CNU	381	2	1.88098	2	130	2	4	144	203	237	-0.114253	-0.466435	-0.629162	0.528102	-0.272615	-0.126487	1.12184	0.657825	1.21026	1.00062	1.03871	1.22981	0.103609	-2.28556	0.274349	-0.321769	-0.717356	0.526018	-0.0896577	-2.28556	1.29934	0.703447	0.701214	1.16051	0.373408	0.961925
SI	CNU	399	2	3.02784	2	127	1	193	162	177	216	0.229967	-0.946125	-0.645095	0.0538754	-0.101027	0.309148	1.13306	0.545237	1.01292	0.677125	1.07506	1.05388	-0.0536849	-1.03141	0.223864	-0.077166	-0.0102192	0.30103	-0.10199	-0.128318	2.4336	1.44571	1.54204	2.07529	1.19519	2.08884
ACB	CNU	375	2	4.39827	2	131	1	199	128	205	248	0.0155122	-0.962211	-0.962211	0.280827	0.134699	0.168122	0.964645	0.469152	1.07918	0.837129	1.34528	1.08894	-0.391866	-1.64714	0.508198	-0.80204	-1.64714	0.19796	0.409766	-1.64714	2.30965	1.55589	1.72596	2.26269	1.36528	1.95492
OT	CNU	377	2	3.81906	2	138	1	200	128	205	248	-0.69897	-0.39794	0.255273	0.447158	-0.39794	-0.39794	1.27875	1.04922	1.88986	1.25527	1.65514	1.04139	-0.634729	-1.23679	0.582755	-0.00634018	-1.23679	-0.391691	0.105634	0.0642409	2.4027	1.73076	1.70917	1.72653	1.2345	2.35047
LSc	CNU	380	2	0.562781	2	178	3	101	144	203	237	-0.234083	-0.778151	-1.07918	0.500602	-0.0791812	0.0669468	0.464887	0.176091	0.676694	0.176091	0.39794	0.720159	0.123038	-1.45675	0.259258	-0.252626	-0.0765343	0.467534	-0.342802	-1.45675	0.958228	0.61144	0.525526	1.35214	0.0873225	0.335646
AAA	CNU	386	2	0.494563	2	96	3	63	128	192	226	0.0511525	0.0511525	-0.425969	0.352183	-0.425969	-0.124939	0.687975	0.273001	0.477121	0.419129	1.13033	0.916454	-0.455932	-1.30103	-0.30103	-0.823909	0.694605	0.0606978	-0.60206	-0.221849	2.09465	0.537819	0.352183	1.25648	0.79588	1.69679
FS	CNU	376	2	0.431766	2	99	1	176	128	205	248	-0.0669468	-0.0669468	-0.0669468	0.234083	-0.0669468	-0.0669468	1.18833	-0.0669468	0.234083	0.778151	1.25527	0.887296	-0.0630517	-0.665112	-0.665112	0.11304	0.179986	0.448832	-0.364082	-0.18799	2.38527	1.30802	1.09076	1.96328	1.27937	1.70596
MA	CNU	400	2	0.364578	2	174	1	183	162	177	216	0	0	-0.30103	0.176091	0	0	0.977724	0.544068	0.39794	-0.30103	0.653213	0.60206	-0.358173	-0.960233	-0.483112	-0.0571429	0.69298	-0.358173	-0.261263	-0.483112	2.45807	0.979286	0.630832	1.59848	1.06096	1.87228
IA	CNU	392	2	0.182828	2	151	3	111	128	192	226	-0.263241	0.0377886	-0.564271	0.338819	0.134699	-0.263241	0.134699	-0.564271	0.581857	0.435729	0.581857	0.714482	-0.21987	-0.483112	-0.358173	-0.659203	-0.416165	0.524067	0.410835	-0.960233	1.22161	-0.182082	-0.0571429	1.40712	0.306939	0.372206
MEA	CNU	393	2	2.02769	2	97	3	106	128	192	226	0.00520119	-0.362776	-0.663806	0.257013	0.364223	-0.663806	1.01441	0.201496	0.321471	0.521831	1.27737	0.691582	0.340022	-0.195631	-0.559308	-0.574548	-0.623766	0.475224	0.085504	-0.720676	1.58274	0.21129	-0.129611	1.57599	0.544142	0.783115
CP	CNU	373	2	26.0193	2	154	1	195	152	214	249	0.101458	-0.500602	-1.27875	0.364699	-0.102662	0.101458	0.660766	-0.237361	-0.16481	0.323306	1.09046	0.762639	-0.0265922	-0.566206	0.0904398	-0.28097	0.332989	0.308855	-0.180855	-0.73461	2.34736	1.3996	1.21324	2.55411	1.51619	1.84913
SF	CNU	383	2	0.474187	2	188	3	52	144	203	237	-0.367977	-0.367977	-0.367977	0.109144	-0.0669468	0.410174	-0.0669468	-0.367977	1.10914	-0.367977	0.109144	1.12338	0.217484	-1.30103	-0.154902	-0.124939	0	0.574031	-1.30103	-1.30103	1.76827	0.740363	0.20412	1.70969	0.724276	1.30428
BA	CNU	387	2	0.0250469	2	192	3	159	128	192	226	0	0	0	0	0	0	1.11394	0	0	0.90309	0	1.6902	-0.49485	-0.0177288	-0.49485	0.10721	-0.49485	-0.19382	0.459392	0.10721	2.20151	-0.49485	-0.49485	2.42527	-0.0177288	1.26102
SH	CNU	384	2	0.0371875	1	74	2	10	144	203	237	0.0791812	0.0791812	-0.221849	0.255273	-0.221849	-0.221849	0.255273	0.255273	0.380211	-0.221849	0.778151	-0.221849	-0.477121	-0.477121	0.367977	-0.176091	-0.176091	0.30103	0.124939	-0.477121	0.636822	0.636822	1.02803	1.25527	0.564271	0.985277
GPe	CNU	396	2	1.56428	1	47	1	186	133	153	204	0.266268	-0.335792	0.141329	-0.0347621	-0.0347621	-0.335792	-0.335792	-0.335792	-0.335792	0.141329	-0.0347621	-0.335792	-0.352183	-0.653213	-0.653213	0.425969	0.522879	-0.653213	-0.352183	-0.352183	2.00384	0.970037	0.492916	2.63099	1.37617	1.76839
TRS	CNU	405	2	0.356312	1	80	3	72	150	167	211	-0.477121	-0.176091	-0.477121	0.522879	-0.477121	0	0.69897	-0.477121	0.669007	-0.477121	-0.176091	-0.477121	0.259637	-0.916454	-0.916454	0.0377886	0.0835461	0.530704	-0.916454	-0.916454	1.8544	0.463757	-0.138303	2.05203	1.08355	1.25086
BAC	CNU	408	2	0.00754687	1	9	3	127	179	192	223	-0.0669468	-0.0669468	-0.0669468	-0.0669468	-0.0669468	0.234083	-0.0669468	-0.0669468	-0.0669468	-0.0669468	0.410174	-0.0669468	0.425969	-0.176091	0.124939	-0.176091	-0.176091	-0.176091	-0.176091	-0.176091	1.44716	-0.176091	-0.176091	1.45738	-0.176091	0.124939
GPi	CNU	397	2	0.423438	1	10	3	40	133	153	204	0.30103	-0.176091	-0.176091	0.124939	-0.176091	-0.176091	0.30103	-0.176091	-0.176091	0.124939	-0.176091	0.124939	0.149762	-0.327359	-0.327359	-0.0263289	0.274701	-0.327359	-0.0263289	0.149762	1.49219	0.149762	-0.327359	2.15551	0.848732	0.274701
LSv	CNU	382	2	0.607594	1	55	3	120	144	203	237	-0.0269835	-0.538867	-1.14093	0.614948	-1.14093	-0.295829	-0.237837	-0.839897	-0.295829	-0.186684	0.220801	0.583349	0.332094	-1.79501	-0.564562	-0.203946	-0.317889	0.645899	-1.79501	-1.79501	1.30398	0.129269	-0.472791	1.21316	0.527209	1.17487
PVT	TH	458	3	0.444219	2	103	2	11	255	144	159	0.0141981	-0.223163	-0.928763	0.197843	0.121646	0.13048	0.598767	0.133385	0.591771	0.382175	0.551686	0.742623	0.0541315	-0.483811	0.0365056	0.0873725	0.154972	0.0181339	0.149063	-0.458987	0.722433	0.737015	0.580206	0.553694	0.651228	0.906223
RE	TH	460	3	0.424484	2	93	1	167	255	144	159	0.0205865	-1.23469	-0.933656	0.242435	0.066344	0.270464	0.729102	0.481317	0.646128	0.536166	1.14006	1.01817	0.427042	-0.62411	-0.0405335	-0.288318	-0.13509	0.241191	-0.0130953	-0.661899	1.27717	1.10694	1.00086	1.24316	1.0988	1.63517
GENv	TH	470	3	0.523125	1	83	3	154	255	144	159	-0.216386	-1.5966	-1.5966	0.546418	0.110973	-0.274378	-0.994537	-1.29557	-1.5966	0.0368714	0.143766	0.390175	0.307339	0.423845	-1.10763	-0.12991	-0.367271	0.0964861	-0.232573	-0.630513	2.51603	0.0537341	-0.505574	1.26894	0.182401	0.520755
ILM	TH	462	3	1.60608	1	60	1	172	255	144	159	0.011281	-1.40369	-0.625541	0.219557	0.352183	-0.102662	0.0587057	-0.289749	-0.704722	-0.14842	0.55055	0.649386	0.351261	0.00118175	-0.515448	-0.263636	-0.457456	0.236051	0.0459941	-0.143062	1.79751	1.10854	0.952266	1.65397	0.64592	1.33142
PT	TH	459	3	0.229781	2	100	2	3	255	144	159	0.282145	-0.416825	-0.416825	-0.115795	0.219997	-0.0488486	0.583175	0.685837	0.336502	0.869481	1.01454	1.11037	0.321233	-1.62325	-0.0211893	0.228009	-0.0211893	0.263241	-0.509306	-0.845098	1.29896	0.688505	0.455932	0.967815	0.845098	1.44679
MED	TH	452	3	2.01323	2	148	3	75	255	144	159	-0.202105	-0.253257	-0.679226	0.186075	-0.0424038	0.335014	0.362167	-0.253257	-0.114955	0.258626	0.724466	0.676162	0.306957	-0.83397	-0.43603	0.0410912	-0.12076	0.365602	0.0362387	-0.709031	1.96318	0.700691	0.427293	1.83797	0.96075	1.64711
LH	TH	477	3	0.345828	2	158	3	95	255	144	159	-0.176091	-1.21748	-0.916454	0.0377886	0.463757	0.0612697	-0.740363	0.162727	0.326584	0.124939	0.373581	0.51491	0.137713	0.281135	-0.0198948	-0.445864	-0.182622	-0.224015	0.294499	-0.746894	1.43685	0.621083	0.448083	1.12623	0.320053	0.744468
SPF	TH	422	3	0.203844	2	194	3	87	255	128	132	-0.0791812	-0.477121	-0.477121	0.0669468	0.263241	0.176091	0.425969	-0.477121	0.500602	0.39794	1.02803	1.27875	0.40824	-0.0177288	-0.561797	-0.737888	-0.737888	0.12245	0.350248	-0.561797	1.48353	0.546543	0.283301	1.24888	0.392446	0.739233
MH	TH	476	3	0.320188	2	132	3	102	255	144	159	0.0791812	-0.522879	-0.522879	0.0791812	0.0791812	0.255273	0.176091	0.623249	1.38561	0.939519	1.04532	1.32222	-0.118099	0.483961	-0.419129	-0.720159	-0.720159	-0.243038	0.234083	0.0579919	1.35172	0.81132	0.124939	1.42597	0.234083	0.124939
ATN	TH	443	3	2.15848	1	65	1	184	255	144	159	0.521027	-0.893947	-0.893947	-0.0488486	-0.115795	-0.115795	0.0602959	-0.592917	-0.893947	-0.0488486	0.884205	0.992544	0.495605	-1.36173	-0.884607	-0.320335	0.0184834	0.354276	-0.282547	-0.407485	2.20471	1.26461	0.489531	1.94362	0.980695	2.00989
VENT	TH	413	3	4.85839	1	66	3	71	255	128	132	0.483555	-1.04792	-0.445864	0.182525	-0.144834	-0.570802	-0.445864	-0.570802	-0.746894	0.274296	0.633318	0.715504	-0.263761	0.0256875	0.0137883	-0.144574	0.147682	0.0372694	0.197848	-0.241484	1.85316	0.700524	-0.0110353	1.85106	0.892055	1.36704
LAT	TH	437	3	3.07977	1	84	1	177	255	144	159	0.147128	-0.838149	-0.169142	0.0826696	0.147128	0.0649408	-0.537119	-0.470172	-1.01424	-1.31527	-0.537119	0.0649408	0.191531	-0.0846756	-0.737888	-0.163857	-0.0177288	0.228254	0.00247462	0.0402632	2.12335	1.27495	1.10876	1.97686	1.23984	1.73523
GENd	TH	427	3	1.42195	1	87	3	67	255	128	132	-0.176091	-0.916454	-0.372386	0.244914	0.3623	-0.138303	-0.372386	-0.916454	-1.21748	-0.138303	0.0835461	-0.439333	-0.250725	0.43725	-0.852785	-0.676694	-0.676694	0.244125	-0.250725	0.261158	2.0565	0.932545	0.966759	1.80043	0.527426	1.32763
RT	TH	469	3	1.44725	1	63	3	79	255	144	159	0.146128	-0.69897	-0.69897	0.146128	0.342423	-0.221849	-0.39794	-0.69897	-0.69897	-0.221849	0.832509	0.531479	0.261521	-1.0607	-1.0607	-0.2156	0.169751	0.507504	-0.583577	-0.361728	2.22576	0.48337	-0.282547	2.19698	0.842392	1.4236
SPA	TH	425	3	0.132094	2	166	2	1	255	128	132	-0.0669468	-0.367977	-0.367977	-0.0669468	0.234083	0.234083	-0.367977	-0.367977	-0.0669468	0.410174	0.910777	0.933053	0.474817	-0.595221	-0.352183	-0.720159	-0.595221	0.393784	-0.0511525	-0.294191	1.24988	0.716533	0.628794	1.06279	0.766507	1.20412
PP	TH	426	3	0.0614375	1	46	3	107	255	128	132	-0.39794	-0.39794	-0.09691	-0.09691	0.20412	0.30103	0.0791812	-0.39794	-0.39794	-0.39794	-0.39794	-0.39794	0.384576	-0.138303	-0.615424	-0.138303	-0.615424	0.425969	-0.615424	-0.138303	1.33397	0.287666	-0.013364	1.3577	0.287666	1.32906
SO	HY	480	4	0.0468438	2	201	3	55	255	93	80	-0.124939	0.352183	-0.124939	-0.124939	-0.124939	-0.124939	2.29831	2.23109	2.22337	2.07372	2.27473	2.10806	0.402488	-0.375664	-0.0746336	-0.375664	-0.375664	-0.0746336	-0.375664	0.323306	1.55376	0.101458	0.101458	1.69252	0.946556	1.18064
PVH	HY	482	4	0.188688	2	133	3	103	255	93	80	0.0765571	-0.0617456	-1.14093	0.102111	0.160103	0.0631931	0.829885	0.820494	0.948978	1.08824	1.22922	1.29124	0.116276	-1.06461	0.0264665	0.24714	0.157235	-0.0102563	-0.0945772	-0.251701	1.08358	0.422053	0.116276	1.04598	0.466865	0.76469
LHA	HY	524	4	2.07141	2	113	3	89	242	72	59	-0.193293	-0.711807	-0.670415	0.415298	0.207271	-0.132024	0.626649	0.251981	0.66477	0.709797	0.864534	0.732238	-0.058601	-0.194958	-0.135189	-0.157466	-0.91959	0.128616	0.513867	-0.481977	1.31197	0.389855	0.274985	1.23654	0.0346528	0.589671
MPO	HY	492	4	0.556953	2	114	3	96	255	85	71	0.104324	-0.122072	-0.239458	0.195771	-0.587912	0.195771	0.742189	0.32345	0.638588	0.729508	0.769436	0.574606	-0.148939	-1.66745	0.261966	-0.176091	0.0315171	0.235637	-0.135974	0.095975	1.51066	0.843092	0.456399	0.867841	-0.0992512	1.14679
AHN	HY	504	4	0.710406	2	186	3	113	255	76	62	0.0702264	-0.141193	-0.196041	-0.0547123	0.051743	0.163502	0.418369	0.0173741	0.397585	0.14486	0.506256	0.294781	0.382631	-2.25285	0.0236088	0.151981	-0.257218	0.108875	0.0119648	-0.619385	1.44568	-0.199775	-0.344368	1.05121	0.425665	0.879407
SBPV	HY	498	4	0.1095	2	104	3	139	255	85	71	0.257835	0.0416262	-0.335792	0.0416262	-0.0431953	-0.206697	0.474544	0.208276	0.579648	0.534792	0.641932	0.563102	0.246181	-1.71286	0.162201	0.125989	-0.31492	0.167954	0.0795316	-0.566732	0.917568	-0.598917	-0.194346	0.639322	0.380562	0.69876
DMH	HY	490	4	0.376063	2	94	3	135	255	85	71	0.0875333	-0.494323	-0.155505	0.18856	0.18856	-0.173988	0.945727	0.378098	0.505677	0.692171	0.827896	0.908329	0.292814	0.175845	0.066418	-0.227059	-0.80485	0.16586	0.0181133	-0.936129	1.22735	0.267991	0.179775	1.20096	-0.19345	0.259933
TU	HY	531	4	0.523438	2	199	3	123	242	72	59	-0.352183	-0.653213	-0.653213	0.577236	-0.176091	-0.176091	1.35962	1.33801	1.63904	2.00289	1.78927	1.39601	0.403692	-0.352183	-0.449093	-0.148063	-0.507084	-0.0299632	0.346787	-0.31079	1.68524	0.124939	-0.206054	1.49724	0.281286	0.716003
SCH	HY	499	4	0.0660781	2	180	3	144	255	85	71	0.0661297	0.0195535	0.0195535	-0.75048	0.0276714	0.176091	0.359736	0.355976	0.633734	0.399081	0.607032	0.441406	0.51558	-1.25527	0.378196	-0.352183	-0.255273	-0.954243	0.0457575	-1.25527	0.831087	0.425969	-0.0248236	0.452298	0.642355	0.770033
PH	HY	522	4	0.707047	2	142	3	145	255	76	62	0.396602	-0.522879	-0.68258	-0.131672	0.238239	-0.275094	0.512397	-0.432702	0.423876	0.238239	0.536364	0.939519	0.368153	0.0297171	-0.201422	-0.197527	-1.54777	0.258405	0.128004	-0.831771	0.812061	0.570821	0.467585	0.789085	0.145952	0.620723
ARH	HY	485	4	0.286328	2	139	3	88	255	93	80	-0.282547	-0.884607	-0.282547	0.620543	-0.884607	-0.282547	1.501	0.966652	1.33288	1.35843	1.11103	1.22934	0.267606	0.191886	-0.0511525	-0.829304	-1.13033	-0.352183	0.425969	-0.431364	1.54727	0.522879	0.48245	1.69574	0.568636	0.0457575
LPO	HY	525	4	0.554984	2	109	3	68	242	72	59	-0.429829	-0.496776	-0.575957	0.397171	-0.320685	0.316137	0.557582	0.243587	0.424043	0.457467	0.883435	0.702796	-0.144335	-1.25828	0.343782	-0.957248	0.0841447	0.354506	0.042752	-0.480127	2.20621	1.19351	0.71485	1.5862	0.561266	1.48523
RCH	HY	529	4	0.147641	2	121	3	56	242	72	59	-0.221849	-0.425969	0.236789	-0.124939	-0.0457575	0.217484	0.964966	0.70757	0.866287	0.487845	0.744293	0.72632	0.0477728	-0.730378	0.473742	-0.730378	-0.730378	-0.730378	0.0477728	0.311014	1.7855	0.311014	0.269622	1.50767	0.311014	1.17271
VMH	HY	521	4	0.549516	2	102	3	114	255	76	62	0.0263289	-0.726999	-0.50515	0.408664	-0.249877	0.118099	0.176091	0.157608	0.90647	0.628389	0.932601	0.608793	0.459294	-0.0960228	-0.229916	-0.339061	-1.00807	0.292962	-0.0786487	-0.424491	1.34024	-0.15275	-0.0227909	1.37694	0.289328	0.510446
VLPO	HY	502	4	0.0670469	2	200	3	86	255	85	71	-4.82164e-17	-4.82164e-17	-4.82164e-17	-4.82164e-17	-4.82164e-17	-4.82164e-17	1.6902	1.72428	1.95904	1.86923	1.91908	1.80618	-0.30103	-0.30103	-0.30103	0.544068	0.176091	-0.30103	-0.30103	-0.30103	1.27875	0.30103	0.176091	1.17609	0.39794	1.21748
PVpo	HY	497	4	0.143094	1	69	3	146	255	85	71	0.395586	0.0945561	-0.364082	-0.0630517	-0.48902	-0.18799	0.395586	0.51098	0.667327	0.404926	0.289131	-0.153228	-0.180999	-1.52342	-0.161693	0.296123	0.0676433	-0.0182713	-1.52342	0.395657	1.16589	0.472214	0.25473	0.643896	0.552126	0.476579
MPN	HY	517	4	0.404625	2	171	3	115	255	76	62	-0.0871502	-0.0202034	0.195396	0.296067	-0.68921	-0.321233	0.742154	0.265032	0.604521	0.21388	0.424733	0.31079	-0.0365038	-1.86258	-1.01748	-0.282795	0.447052	0.201879	-1.26052	0.301774	1.42746	0.0819041	-0.190481	1.05702	0.449175	0.731814
PVi	HY	484	4	0.200406	2	146	3	117	255	93	80	0.361028	-0.352183	-0.653213	0.191886	-0.431364	0.0457575	0.48245	0.249877	0.361028	0.577236	0.640518	0.640518	-0.198755	0.199185	0.0864805	0.257177	-0.742823	-0.0896108	0.173631	-0.566732	1.5461	0.035328	-0.441793	1.53249	0.257177	0.257177
ZI	HY	532	4	1.8007	2	167	3	109	242	72	59	0.332064	-0.829304	-0.653213	0.316824	0.0457575	-0.528274	-0.0889411	0.100115	-0.0889411	0.460731	0.714764	0.814149	0.117441	-0.0751649	-0.177154	-0.140432	-0.261475	0.366914	0.110911	-0.532542	1.54712	0.32479	-0.0554208	1.37986	0.273638	0.971702
MEPO	HY	491	4	0.0405469	2	106	3	65	255	85	71	-0.322219	-0.720159	-0.419129	0.154902	-0.720159	0.522879	0.376751	0.30103	0.580871	0.410174	0.51029	0.798355	0.0109954	-0.687975	0.157123	0.0109954	-0.0859146	0.353418	0.0109954	-0.687975	2.20523	1.17535	0.590779	1.47638	0.157123	1.0679
AVPV	HY	489	4	0.182984	2	128	3	110	255	85	71	-0.726999	0.386945	-0.425969	0.273001	-0.726999	-0.0280287	0.90647	0.449093	1.05115	0.916454	0.574031	0.896251	-0.386945	-0.989005	0.333215	0.124939	-0.0347621	-0.210853	-0.989005	0.372723	1.6163	0.567298	-0.143907	1.27345	-0.0347621	1.14453
MBO	HY	505	4	1.01611	2	181	3	58	255	76	62	0.266268	-0.0927541	-0.636822	-0.159701	-0.0347621	0.176091	0.509306	-0.636822	0.769718	0.55351	0.423876	0.580662	0.330895	-0.151759	-0.964672	-0.867762	-0.566732	0.617959	-0.663642	-0.566732	1.52034	0.392309	0.252812	1.60206	0.470694	1.12169
PVa	HY	483	4	0.0498594	1	41	3	156	255	93	80	-0.193293	0.0875333	-0.280443	0.48959	-0.757565	-0.456535	-0.933656	-0.632626	-0.193293	-0.389588	0.437412	-0.193293	-0.157608	-1.0607	0.240332	0.416423	-0.157608	0.218056	-0.361728	-1.0607	2.04787	-0.0606978	-0.759668	1.4956	0.38646	1.09159
PVHd	HY	520	4	0.130766	2	193	3	128	255	76	62	-0.151268	-0.452298	-0.151268	0.0248236	0.0248236	0.325854	0.0248236	0.325854	0.149762	0.99486	1.104	1.16049	0.518283	-1.45484	-0.977724	0.364699	-0.132626	-0.112422	-0.224396	-0.852785	1.56593	-0.308717	-0.609747	0.83519	0.700491	0.513638
PSTN	HY	527	4	0.166063	1	67	3	122	242	72	59	0.30103	-0.60206	-0.60206	-0.124939	0.39794	-0.60206	-0.30103	-0.60206	-0.124939	0.09691	0.176091	1.15381	0	-0.0669468	-0.544068	-0.146128	-0.845098	0.51663	0.196295	-0.845098	1.58627	0.196295	-0.146128	0.940232	0.154902	1.21181
PVp	HY	496	4	0.126969	2	110	3	84	255	85	71	-0.335792	-0.0347621	0.266268	-0.335792	0.141329	-0.0347621	1.00663	-0.335792	0.509306	0.567298	0.509306	0.965238	0.210369	0.582755	-0.935759	-0.333699	-0.634729	0.143422	-0.634729	-0.935759	1.6008	0.319513	0.796635	1.4316	-0.0326691	0.877154
ADP	HY	487	4	0.0997656	2	175	3	126	255	85	71	-0.151268	-0.452298	-0.151268	0.3928	-0.452298	0.149762	0.450792	0.149762	0.848732	0.246672	0.661646	0.325854	-0.0211893	-0.720159	-0.419129	0.0579919	0.279841	0.393784	-0.118099	-0.720159	1.58947	0.641569	-0.720159	0.951939	0.124939	1.43518
PMv	HY	519	4	0.19575	2	195	3	77	255	76	62	-0.221849	-0.221849	-0.221849	-0.221849	-0.221849	0.477121	0.255273	-0.221849	0.380211	0.982271	0.954243	1.10037	0.249877	0.307869	-0.197281	-0.896251	-0.595221	0.404779	-0.896251	-0.294191	2.42988	0.660052	0.896141	2.17673	0.249877	1.47666
AVP	HY	488	4	0.0921562	2	153	3	121	255	85	71	-0.452298	-0.452298	-0.452298	0.246672	0.0248236	0.325854	0.246672	0.547702	-0.452298	0.626884	0.723794	0.149762	-0.386945	-0.687975	-0.687975	0.157123	0.692237	-0.687975	-0.386945	-0.687975	1.51885	-0.210853	0.425969	1.19852	-0.386945	1.19284
PMd	HY	518	4	0.131766	1	57	2	23	255	76	62	0.346787	-0.176091	-0.176091	-0.0511525	-0.653213	0.124939	-0.176091	-0.653213	-0.176091	-0.352183	0.191886	0.625541	-0.19382	-0.49485	-0.273001	-0.971971	-0.971971	0.661497	0.174157	-0.670941	1.22115	0.735599	0.630089	-0.971971	0.174157	0.651278
PS	HY	495	4	0.0964531	2	159	3	37	255	85	71	-0.199572	-0.199572	-0.500602	0.198368	-0.500602	0.402488	0.499398	0.101458	-0.500602	0.198368	0.101458	0.499398	-0.49485	-0.49485	-0.19382	0.10721	0.10721	0.546543	-0.49485	-0.49485	1.64503	0.10721	-0.49485	1.49192	0.40824	1.66049
OV	HY	493	4	0.00875	1	71	2	28	255	85	71	-0.176091	-0.176091	-0.176091	-0.176091	-0.176091	0.425969	0.124939	1	0.30103	0.30103	-0.176091	-0.176091	-0.0511525	-0.0511525	0.249877	-0.0511525	-0.0511525	-0.0511525	-0.0511525	-0.0511525	-0.0511525	-0.0511525	0.249877	0.550907	-0.0511525	-0.0511525
STN	HY	530	4	0.194734	2	149	2	2	242	72	59	0.124939	-0.176091	-0.176091	-0.176091	0.30103	-0.176091	0.522879	-0.176091	-0.176091	0.124939	0.60206	0.726999	-0.210853	0.391207	-0.210853	-0.210853	-0.210853	-0.210853	0.266268	-0.210853	1.51342	0.692237	0.743389	0.634245	0.391207	1.628
SFO	HY	500	4	0.0215937	2	182	3	43	255	85	71	0	0	0	0	0	0	0	0	1.04139	0.477121	0	0.90309	-0.09691	-0.09691	0.20412	-0.09691	-0.09691	0.20412	-0.09691	-0.09691	2.26858	0.20412	0.380211	2.02366	-0.09691	0.748188
PD	HY	494	4	0.0116094	1	75	2	29	255	85	71	0	0	0	0	0	0	0	0	0.778151	0	0	0	0.455932	-0.243038	-0.243038	-0.243038	-0.243038	0.0579919	-0.243038	0.0579919	1.09938	0.234083	-0.243038	-0.243038	0.0579919	-0.243038
PST	HY	526	4	0.01275	1	12	3	118	242	72	59	-0.0669468	-0.0669468	-0.0669468	0.234083	-0.0669468	-0.0669468	0.234083	-0.0669468	-0.0669468	-0.0669468	-0.0669468	-0.0669468	0.50515	-0.273001	-0.273001	-0.273001	-0.273001	0.0280287	0.0280287	-0.273001	1.90309	0.20412	0.0280287	1.51233	-0.273001	0.0280287
ASO	HY	481	4	0.0060625	1	15	3	129	255	93	80	0	0	0	0	0	0	0.30103	0	0	0	0	0	0.329059	-0.273001	-0.273001	0.425969	-0.273001	-0.273001	-0.273001	-0.273001	1.60206	0.0280287	-0.273001	1.12494	0.0280287	0.329059
IPN	MB	591	5	0.356516	2	173	3	136	255	166	255	-0.619789	0.334454	0.0791812	0.158362	-0.619789	-0.142668	0.421604	0.795185	0.827369	-0.619789	0.658965	0.827369	-0.546645	0.431078	0.298453	-0.625827	-1.02377	-1.3248	0.0369311	0.193717	1.43563	0.692237	0.137601	1.05722	-0.847675	0.231506
ICc	MB	542	5	1.1263	1	82	3	142	255	122	255	-1.83569	-0.774993	-0.197201	-0.404327	0.532596	0.139741	-0.756509	-2.13672	-0.464623	0.181343	0.103829	0.414729	-0.89279	0.64337	0.125122	-0.724386	-2.47257	-0.348722	0.0419741	-0.400692	1.01598	0.0550563	0.00309756	0.315595	-1.01018	0.496842
SCsg	MB	539	5	1.15198	1	86	3	92	255	122	255	-1.34132	-1.64235	-1.51742	0.495421	0.255273	-0.0122659	-1.04029	-1.11948	-0.943385	-0.657078	-0.628114	-0.244415	-0.00130615	0.422038	-0.114204	-0.457986	-1.26717	0.303631	-0.00393029	-0.730053	1.36719	0.124939	0.160603	0.995806	0.217918	1.33993
ICe	MB	544	5	1.99797	1	39	3	143	255	122	255	-1.02291	-1.0809	-0.528059	-0.0747409	0.625451	-0.334935	-0.624969	-1.14785	-0.0999245	0.09519	-0.0626764	0.0783221	-0.226915	0.42234	-0.153683	-0.803168	-1.61608	0.318417	-0.142595	0.0322785	1.19733	-0.23137	-0.366883	0.407171	-0.917111	0.834937
SCig	MB	560	5	2.03683	1	32	3	132	255	144	255	-0.596456	-1.40937	-0.295426	0.410174	0.253388	-0.076931	-0.0383016	-0.596456	-0.295426	0.134699	-0.154097	0.285236	0.164668	-0.0308338	-0.843747	-0.430958	-1.50651	0.581631	-0.29699	-0.129928	1.09425	0.0120089	-0.339188	0.845677	-0.190535	1.00645
ICd	MB	543	5	1.32262	1	58	3	140	255	122	255	-1.60387	-0.758768	-0.489922	0.0493467	0.572225	-0.205926	-0.562473	-1.30284	0.304619	0.058892	0.276948	0.510078	-0.544068	0.493951	0.0998044	-0.508596	-1.73904	0.181774	0.0462852	-0.423774	1.15119	-0.238442	0.00394219	0.417303	-0.416825	0.947889
SCzo	MB	540	5	0.363312	1	89	3	97	255	122	255	-0.88696	-1.79005	-1.48902	0.484107	0.270647	-0.0418624	-0.511297	-1.09108	-1.18799	-0.676107	-0.210267	-0.0266225	-0.248642	0.669007	-0.386945	-0.767156	-1.46613	-0.0267932	-0.0859146	-0.405428	1.25856	0.463293	0.654448	1.01316	0.278167	1.13593
SCdg	MB	557	5	1.19505	1	59	3	138	255	144	255	-0.193515	-0.694118	-0.326141	0.190489	0.180944	0.208972	-0.0743287	-0.0920575	-0.569179	0.180944	-0.0572954	0.396963	0.145336	0.241269	-0.298904	-0.471616	-1.20199	0.219198	-0.0558662	0.152594	1.07389	0.1124	-0.025903	0.71182	-0.423843	0.900525
SCop	MB	538	5	0.643047	1	42	3	130	255	122	255	-1.09108	-1.39211	-0.613959	0.452988	0.289131	-0.0698912	-0.312929	-0.69314	-0.278167	-0.547012	-0.39211	0.164192	0.228179	0.0388867	-0.381753	-0.143279	-1.39248	0.496825	-0.254174	-0.463058	1.1611	-0.143279	-0.331779	0.925064	0.0224962	1.19467
EW	MB	578	5	0.026	2	134	2	5	255	144	255	0.0791812	-0.221849	0.0791812	0.255273	-0.221849	-0.221849	0.623249	0.778151	1.0086	1.46835	0.892095	1.45025	0.331699	-0.709694	-0.408664	0.244549	-0.709694	0.466397	-0.709694	-0.709694	1.56446	1.04618	0.494426	1.40425	0.135404	0.87009
PRC	MB	562	5	0.171375	1	40	3	150	255	144	255	0.118948	-0.130929	-0.130929	0.312768	-0.30702	-0.182082	-0.130929	-0.0851716	-1.08517	-0.483112	0.118948	0.433342	0.598901	-0.391691	-1.23679	-0.0193052	-1.23679	0.268361	-0.2156	-1.0607	0.910887	0.169751	-0.30737	0.617517	0.475018	0.487487
SCiw	MB	559	5	2.09277	1	61	3	158	255	144	255	-0.669007	-0.970037	-0.191886	0.427903	0.0299632	0.109144	-0.124939	-0.271067	-0.492916	0.143907	0.352183	0.410174	0.164045	-0.320375	-1.48917	-0.489167	-1.09123	0.625611	-0.298835	-0.0459042	1.3752	-0.457759	-1.01205	1.18592	0.0193625	1.29043
MPT	MB	568	5	0.0440781	1	43	2	13	255	144	255	-0.778151	-0.60206	-1.07918	0.544068	9.64327e-17	9.64327e-17	-0.124939	-0.778151	-0.380211	-0.234083	-0.30103	-0.124939	-0.0211893	0.535113	0.234083	-0.720159	-0.720159	-0.243038	-0.118099	-0.720159	0.711204	1.09275	0.558594	1.17747	-0.243038	0.756962
VTA	MB	552	5	0.427578	2	189	3	69	255	144	255	0.360616	-0.753328	-0.276206	-0.276206	-0.0543577	0.200915	0.360616	0.0917704	0.0917704	0.149762	0.288065	0.288065	-0.243038	0.182931	0.0202034	0.124939	-0.720159	0.154902	-0.322219	0.154902	1.66634	1.24598	0.923293	1.90874	0.0579919	1.54584
DR	MB	602	5	0.153344	2	191	3	124	255	166	255	-0.69897	-0.39794	-0.69897	0.0791812	0.477121	-9.64327e-17	0.380211	0.447158	-0.39794	0.556303	-0.09691	0.20412	0.0864805	-0.867762	-0.0896108	0.433268	-0.867762	0.0616569	-0.469822	0.173631	1.70278	0.0616569	0.246181	1.54638	-0.168792	0.745022
NPC	MB	570	5	0.288813	1	34	3	90	255	144	255	-0.221849	-0.823909	-0.124939	0.290035	-0.346787	0.322219	0.322219	-0.221849	-0.823909	-0.522879	0.290035	0.176091	0.414539	-0.557432	-0.761552	-0.230073	-0.761552	0.600176	-0.858462	-1.15949	1.34971	0.503266	0.192691	0.986636	-0.0987942	0.748993
APN	MB	567	5	1.27603	1	88	3	64	255	144	255	-0.327359	-0.452298	-0.628389	0.432309	0.216709	-0.230449	-0.628389	-0.929419	-0.929419	-0.628389	-0.452298	0.413004	0.243038	-0.30103	-0.726999	-0.0901766	-0.50515	0.574031	-0.30103	-0.726999	1.39576	0.909823	0.467978	1.88965	0.364082	1.64468
SNr	MB	551	5	1.54812	2	115	3	76	255	144	255	0	-0.30103	-0.30103	-0.30103	0.176091	0.30103	1.09691	0.544068	0.544068	0.653213	0.60206	0.69897	0.239284	-0.413928	-1.01599	0.160103	-0.413928	0.306231	-0.413928	0.188132	1.77359	0.682982	0.739887	2.03824	0.43117	1.51931
NOT	MB	569	5	0.205609	1	85	3	45	255	144	255	-0.920819	-0.920819	-0.920819	0.380211	0.357935	-0.0177288	-0.619789	-0.920819	-0.920819	-0.619789	-0.920819	-0.142668	-0.210853	0.417536	-0.511883	-0.511883	-0.812913	0.442359	-0.113943	-0.335792	2.2777	0.391207	0.333215	1.91463	-0.113943	0.950515
CLI	MB	601	5	0.0834375	2	183	3	41	255	166	255	0.380211	-0.221849	-0.221849	-0.221849	0.0791812	-0.221849	0.380211	0.778151	-0.221849	0.477121	1.2833	-0.221849	-0.339948	-0.163857	0.313264	0.137173	-0.339948	0.313264	-0.163857	-0.640978	1.51436	0.472965	-0.640978	1.56854	0.563142	1.3035
RL	MB	600	5	0.0554062	2	196	3	94	255	166	255	0	0	0	0	0	0	0.477121	0.69897	0	0.778151	0.845098	1.07918	0.39794	-0.425969	-0.90309	-0.90309	-0.60206	0.60206	-0.60206	-0.425969	1.0054	0.419129	0.138303	1.01072	0.588272	1.35218
SNc	MB	587	5	0.197328	2	160	3	62	255	166	255	-0.0669468	-0.367977	-0.367977	-0.367977	0.330993	0.234083	0.109144	0.234083	-0.367977	0.410174	0.410174	0.109144	-0.176091	-0.176091	-0.477121	0.367977	-0.477121	-0.176091	-0.477121	0.425969	2.00289	0.801632	0.636822	1.6721	0.124939	1.54818
SCdw	MB	558	5	0.332547	2	164	3	131	255	144	255	0	-0.30103	0	0	-0.30103	0.30103	0	0.30103	-0.30103	0	0.477121	0.653213	0.308169	-0.240645	-0.877467	0.0433514	-0.655619	0.49667	-0.451499	-0.354589	1.3138	0.0925694	-0.354589	0.993716	-0.400346	1.06371
RN	MB	575	5	0.788172	1	52	3	44	255	144	255	-0.318759	-0.619789	0.421604	-0.619789	0.334454	-0.619789	-0.619789	-0.142668	-0.619789	-0.619789	-0.0177288	-0.619789	0.0280287	-0.0688813	-0.670941	0.329059	0.0280287	0.0280287	-0.670941	0.141972	1.7373	0.425969	-0.369911	1.8246	0.350248	1.61123
OP	MB	571	5	0.0583281	1	50	2	14	255	144	255	-0.500602	-0.500602	-0.500602	0.45364	0.277549	-0.500602	-0.199572	-0.500602	-0.500602	-0.199572	0.198368	-0.500602	-0.588272	0.110698	0.18988	-0.588272	-0.11115	0.256826	0.18988	-0.287242	0.955796	0.991512	0.667001	1.00279	0.314818	0.642177
ND	MB	564	5	0.0917344	2	161	3	49	255	144	255	-0.176091	-0.176091	-0.176091	0.30103	-0.176091	0.124939	-0.176091	0.522879	-0.176091	0.522879	0.124939	0.30103	0.522879	-0.352183	-0.653213	-0.653213	-0.653213	0.38818	-0.352183	-0.176091	1.68921	0.744727	0.577236	1.63009	0.492916	1.21602
VTN	MB	581	5	0.0377813	2	190	3	112	255	144	255	0	0	0	0	0	0	0.69897	0	0	0	0	0.60206	-0.243038	-0.243038	0.0579919	0.0579919	-0.243038	-0.243038	-0.243038	0.455932	1.81004	0.234083	-0.243038	0.711204	-0.243038	0.870905
IF	MB	590	5	0.0868594	1	18	3	46	255	166	255	-0.221849	-0.221849	-0.221849	0.380211	-0.221849	0.0791812	0.0791812	-0.221849	-0.221849	0.0791812	-0.221849	0.0791812	-0.449093	-0.750123	-0.750123	0.249877	-0.273001	0.664851	-0.750123	-0.750123	1.90405	0.0280287	-0.148063	1.96921	0.396006	1.56374
PPT	MB	572	5	0.144141	1	29	3	119	255	144	255	-0.124939	-0.124939	-0.124939	-0.124939	0.352183	-0.124939	-0.124939	-0.124939	-0.124939	-0.124939	0.352183	0.352183	0.0280287	-0.574031	-0.875061	-0.574031	-0.574031	0.737723	-0.875061	-0.39794	1.54158	0.643453	-0.574031	1.12494	-0.39794	1.17802
INC	MB	563	5	0.0794688	1	7	3	42	255	144	255	0	0	0	0	0	0	0	0	0	0	0	0	0.60206	-0.60206	-0.60206	-0.30103	-0.30103	0.30103	-0.60206	-0.60206	1.63599	0.09691	-4.82164e-17	1.5682	0.176091	1.19728
CS	HB	630	6	0.599031	2	140	3	98	255	195	149	0.0377886	-0.263241	-0.263241	0.0377886	0.338819	-0.263241	1.07918	1.33882	1.25527	1.24191	0.967207	1.30496	-1.1181	0.160654	-0.574031	0.124939	-0.464887	0.279841	0.0860207	0.149072	0.589471	0.622263	0.234083	1.4309	0.641569	1.53511
NTS	HB	649	6	0.849281	2	136	2	15	255	165	210	-0.69897	-1	-0.39794	-0.30103	0.531479	0.146128	0.954243	0.919078	1.19312	1.21219	1.15836	1.6637	-0.421421	0.632937	-0.375664	-0.676694	-0.898542	0.0714944	0.0222764	-0.472574	1.40681	0.568819	0.43725	0.487659	0.852223	0.923189
PB	HB	608	6	1.12134	2	152	3	47	255	174	111	-0.0786064	0.315178	0.0463323	-0.446583	0.104324	-0.446583	0.0305381	-0.00288569	0.252387	0.814018	0.425249	0.528593	-0.0304679	0.270562	-0.0406871	0.0684574	-0.584755	0.174913	-0.232573	-0.107634	2.06717	-0.0204837	-0.0841528	1.89297	0.662399	1.46928
PG	HB	619	6	0.964047	1	90	2	22	255	186	134	-0.554287	-0.663432	-0.146802	-0.429348	0.219824	0.44086	-1.80956	-1.50853	-1.50853	-0.730378	-0.0613717	-1.80956	-1.1418	0.263795	0.417177	-0.577527	-1.01686	0.207156	0.0179028	-0.332613	1.11721	0.430299	-0.238708	-0.919949	0.465061	1.38698
VNC	HB	684	6	3.20811	1	76	3	78	255	179	217	-0.471047	-1.37414	0.194065	-0.260194	0.432043	-0.0953835	0.0238029	0.396715	0.238647	0.227923	0.227923	-0.529039	-0.265211	0.266268	0.115	-0.663151	-1.14027	0.138481	0.336849	-0.327359	2.32452	0.743389	0.659068	2.17338	0.665908	1.47882
GRN	HB	662	6	2.61678	1	51	3	50	255	179	217	0.659539	-1.12222	-0.167973	-0.821186	-0.309303	-1.42325	-0.192797	-0.946125	-0.00827253	-0.946125	0.369146	-0.00827253	-0.368888	0.359704	-0.219126	-0.485394	-0.201397	-0.0552691	0.00272286	0.263986	1.97712	0.524515	0.651083	1.54957	0.527768	0.927002
LRN	HB	668	6	0.569766	1	48	2	8	255	179	217	0.74908	-1.36486	-1.36486	-1.36486	-0.665894	-1.36486	-0.461774	-1.06383	0.461211	-0.762804	0.191439	0.21492	-0.852785	0.703518	-0.852785	-0.852785	-0.852785	0.188608	-0.250725	-0.551755	1.45041	0.809973	1.03931	1.38526	0.871491	0.402488
PCG	HB	618	6	0.543375	2	156	3	99	255	186	134	-0.0927541	-0.937852	0.292597	-0.159701	0.238239	-0.159701	0.705601	-0.937852	0.238239	0.778151	0.685397	0.85454	0.113823	0.15958	0.113823	-0.0769918	-0.585147	0.238761	-0.0208758	-0.761239	1.36207	0.627928	0.224038	0.968466	0.734768	1.17828
PRNc	HB	620	6	2.34809	1	62	2	6	255	186	134	0.0511525	-1.20412	0.19382	-0.249877	0.364082	-0.425969	0.09691	-0.124939	-0.726999	0.58121	0.243038	0.243038	-0.90309	0.131672	-0.0280287	0.50909	-0.982271	-0.982271	0.0177288	0.0430346	0.798766	0.693507	0.628389	1.68105	0.309985	1.44065
IRN	HB	665	6	2.77605	1	56	3	57	255	179	217	0.311495	-1.13566	-0.533603	-1.13566	0.497806	-0.436693	0.143091	-1.13566	-0.533603	-0.135663	0.683881	0.262277	-0.636822	0.55351	-0.238882	-1.11394	-0.716003	-0.0725507	-0.238882	0.283997	1.72991	0.31742	0.275223	1.67423	0.610333	1.03834
MDRN	HB	672	6	2.032	1	35	3	80	255	179	217	0.613	-1.21307	-1.21307	-1.21307	0.218289	-1.21307	-0.735954	-0.611015	0.292075	-0.309985	-0.133894	0.449683	0.187087	0.333215	-0.511883	0.333215	-0.511883	-0.0347621	-0.511883	-0.511883	2.42714	-0.511883	0.266268	2.24399	1.56	1.25897
AP	HB	640	6	0.0530781	2	137	2	24	255	165	210	0	0	0	0	0	0	0	1.27875	1.34242	1.49136	1.14613	2.03342	0	0	0	0	0	0	0	0	0	1.17609	0	0	1.25527	0
PRNr	HB	634	6	2.3635	1	44	3	91	255	195	149	0.346057	-1.2974	0.045027	0.100544	0.117578	-1.2974	-0.519244	-0.343153	-0.695336	-0.452298	-0.183452	-0.183452	-0.994537	0.139799	-0.535899	0.26969	-0.306562	0.362444	-0.406265	0.0708559	0.500313	0.362444	-0.181624	1.44381	0.289894	1.26494
NLL	HB	606	6	0.723875	2	197	3	33	255	174	111	0.0791812	-0.39794	-0.39794	0.20412	0.30103	-0.39794	-0.39794	0.681241	-0.39794	1	1.34242	1.38021	-0.939935	-0.303113	0.331132	-0.138303	-0.939935	0.0880937	0.353796	-0.0368451	1.93973	0.216412	0.185004	1.39519	-0.240965	1.38297
DMX	HB	661	6	0.174047	2	135	2	18	255	179	217	-0.124939	-0.124939	-0.124939	-0.124939	0.176091	0.176091	1.33746	0.352183	0.829304	1.44326	1.19728	1.39358	-0.273001	0.50515	-0.273001	-0.273001	-0.273001	-0.273001	-0.273001	0.20412	1.45939	0.329059	1.10721	-0.273001	1.00575	1.14197
TRN	HB	623	6	0.68975	1	91	3	116	255	186	134	-0.151268	-1.2974	0.00363428	-1.2974	0.600231	-0.695336	-1.2974	-0.519244	-1.2974	-0.343153	-0.996366	-1.2974	-0.848958	0.0656113	-0.532688	-0.633359	-1.29612	0.567206	0.283667	-0.296116	1.14793	0.230223	-0.415303	0.971524	0.310265	1.36056
CN	HB	641	6	1.62886	2	124	3	160	255	165	210	-0.176091	-0.176091	0.124939	0.124939	-0.176091	0.124939	0.522879	-0.176091	1.47712	0.669007	1.54818	-0.176091	-1.22401	0.388769	0.173925	-0.746894	-0.922985	-0.144834	0.0770152	0.253106	2.12971	-0.378917	-0.269772	2.03438	0.0547388	0.971885
DCN	HB	644	6	0.415219	1	77	2	25	255	165	210	-0.425969	-0.425969	0.0511525	-0.425969	0.528274	-0.425969	-0.425969	-0.425969	1.41288	-0.425969	-0.425969	0.687975	-0.157608	0.444452	-0.458638	0.444452	-0.458638	-0.458638	-0.458638	-0.458638	0.541362	0.771811	0.143422	-0.458638	1.25737	-0.458638
PAS	HB	676	6	0.0279688	2	105	2	26	255	179	217	-0.263241	-0.263241	-0.263241	-0.263241	0.51491	-0.263241	-0.263241	1.11697	0.940879	0.0377886	-0.263241	1.38997	-0.0511525	-0.0511525	-0.0511525	-0.0511525	0.249877	-0.0511525	-0.0511525	-0.0511525	-0.0511525	0.249877	0.249877	-0.0511525	1.41125	-0.0511525
PGRN	HB	677	6	0.948766	2	168	1	166	255	179	217	0.246672	-0.452298	-0.452298	-0.452298	0.450792	-0.452298	0.246672	-0.452298	-0.452298	0.826456	1.17095	0.246672	-0.88224	0.497971	-0.58121	-0.88224	-0.58121	-0.104089	0.11776	0.293851	1.16698	1.2317	1.19331	2.06715	1.05728	0.895911
PARN	HB	675	6	2.24742	1	64	3	147	255	179	217	-0.346787	-0.823909	-0.0457575	-0.346787	0.556303	-0.346787	-0.221849	-0.823909	-0.823909	-0.124939	0.518514	0.40654	-0.501316	0.351469	-0.258278	-0.501316	-0.626255	0.186659	-0.149134	0.31987	0.706184	0.343782	0.229062	1.64365	0.401774	0.0105673
LC	HB	631	6	0.0145469	2	95	3	148	255	195	149	-0.30103	-0.30103	0.176091	-0.30103	0.39794	-0.30103	0.69897	0.30103	0.740363	0.653213	0.90309	0.929419	-0.176091	0.522879	-0.176091	-0.176091	-0.653213	-0.176091	0.191886	-0.653213	1.02803	0.191886	0.460731	0.669007	-0.176091	0.838149
SPVI	HB	651	6	1.84597	1	36	3	137	255	165	210	0.41407	-0.79005	0.289131	-0.48902	-0.0910805	-0.79005	0.323893	-0.79005	-0.312929	-0.312929	-0.312929	0.41407	-0.14145	0.513689	-0.0480281	-1.06227	-1.06227	0.299459	-0.308941	-0.33527	1.3723	0.0403938	0.0733941	1.00838	0.0733941	0.4818
PHY	HB	680	6	0.270953	2	177	1	185	255	179	217	0.528274	-0.425969	-0.124939	-0.124939	-0.425969	-0.425969	0.687975	0.176091	0.273001	-0.425969	0.574031	0.352183	-0.118099	-0.419129	0.0579919	-0.419129	-0.419129	-0.419129	0.483961	0.182931	2.38501	1.26211	1.02803	2.28416	0.726999	1.33675
NI	HB	633	6	0.105875	2	111	3	100	255	195	149	0	0	0	0	0	0	1.17609	0	0	1.17609	1.07918	0.30103	-0.390641	0.6236	-0.390641	-0.867762	-0.867762	0.0864805	-0.168792	-0.0896108	1.51605	-0.168792	0.650752	0.822434	1.01873	1.25281
LDT	HB	632	6	0.203969	1	22	3	38	255	195	149	-0.159701	-0.636822	0.208276	-0.636822	0.208276	0.208276	-0.0347621	-0.636822	0.141329	0.208276	0.0621479	-0.636822	-0.829304	0.0157943	0.0737862	-0.653213	-0.528274	-0.0163904	0.425969	0.170696	1.71538	0.191886	-0.285236	1.96762	0.212089	1.18353
V	HB	624	6	0.354563	2	169	3	133	255	186	134	-0.176091	-0.176091	0.124939	0.124939	0.124939	-0.176091	-0.176091	-0.176091	0.30103	0.425969	-0.176091	1.23888	-0.90309	0.210853	0	0.210853	-0.90309	-0.90309	0.0511525	0.352183	0.439333	-0.20412	0.327359	1.30374	-0.90309	1.52504
DTN	HB	616	6	0.103703	2	112	3	157	255	186	134	-0.124939	0.176091	-0.124939	-0.124939	0.176091	-0.124939	0.574031	0.176091	0.477121	0.653213	0.829304	0.829304	-0.273001	-0.09691	-0.09691	-0.273001	-0.574031	0.0280287	-0.574031	0.572097	1.87622	-0.273001	-0.09691	1.5721	-0.273001	1.27107
B	HB	615	6	0.0155312	2	179	3	155	255	186	134	-0.124939	-0.124939	-0.124939	-0.124939	-0.124939	0.352183	0.653213	-0.124939	0.352183	0.829304	1.02119	-0.124939	-0.176091	0.30103	-0.477121	0.124939	-0.477121	0.30103	0	-0.477121	1.34895	-0.477121	-0.477121	1.85329	0.636822	0.865301
SPVC	HB	650	6	1.68169	2	165	2	31	255	165	210	-0.221849	-0.221849	-0.221849	-0.221849	0.477121	-0.221849	-0.221849	-0.221849	0.255273	0.0791812	-0.221849	1.12057	-0.665112	0.766252	-0.665112	-0.0630517	-0.665112	-0.665112	-0.665112	-0.665112	-0.665112	-0.665112	-0.0630517	-0.665112	1.14107	-0.665112
MARN	HB	671	6	0.532797	1	13	1	169	255	179	217	-0.335792	-0.335792	-0.335792	-0.335792	0.442359	0.141329	-0.335792	-0.335792	0.266268	-0.335792	0.91948	-0.335792	-0.49485	-0.09691	-0.79588	-0.49485	-0.79588	-0.318759	0.20412	0.619093	1.69126	1.13862	0.936514	1.41896	0.982271	1.06145
XII	HB	690	6	0.281359	1	23	2	27	255	179	217	0.60206	-0.477121	-0.176091	-0.477121	-0.477121	-0.477121	0.522879	0.124939	-0.477121	-0.477121	-0.477121	0.124939	-0.0263289	-0.0263289	-0.327359	-0.327359	-0.327359	0.274701	-0.0263289	0.274701	0.818769	-0.0263289	0.751822	-0.327359	0.672641	-0.327359
SOC	HB	610	6	0.898953	1	53	3	35	255	174	111	-0.619789	-0.619789	0.334454	-0.318759	0.421604	-0.619789	-0.619789	-0.619789	-0.619789	-0.318759	-0.619789	-0.619789	-1.1383	0.308855	-0.661181	-0.09691	-0.661181	0.533795	-0.439333	-0.0591215	1.86645	0.20412	0.183917	1.49919	-0.439333	1.78598
SLD	HB	637	6	0.0471094	1	24	2	19	255	195	149	-0.39794	-0.39794	-0.39794	-0.09691	0.50515	-0.09691	0.0791812	0.20412	-0.39794	-0.39794	0.30103	-0.39794	-0.528274	0.249877	0.249877	-0.227244	-0.0511525	-0.528274	0.316824	-0.528274	1.27107	0.374816	1.11518	0.374816	0.833454	0.425969
AMB	HB	658	6	0.0431719	2	155	3	81	255	179	217	0	0	0	0	0	0	0	0	0	0.778151	1.04139	0.477121	-0.30103	0.176091	-0.30103	0.176091	-0.30103	0	0.30103	-0.30103	2.66087	0.60206	0.477121	2.8651	0.39794	1.04139
VII	HB	656	6	0.917312	2	162	3	34	255	179	217	-0.124939	-0.124939	-0.124939	0.176091	0.176091	-0.124939	0.574031	-0.124939	-0.124939	-0.124939	0.176091	0.916454	-0.419129	0.483961	-0.419129	-0.720159	-0.720159	0.359022	-0.243038	-0.0211893	2.12432	0.359022	-0.0211893	1.72232	0.359022	0.580871
NTB	HB	648	6	0.154609	1	54	3	36	255	165	210	-0.564271	-0.564271	-0.0871502	-0.564271	0.61182	-0.564271	-0.564271	-0.564271	-0.564271	-0.564271	-0.564271	-0.564271	-0.273001	0.0280287	0.0280287	-0.273001	-0.273001	0.329059	-0.273001	0.20412	1.73984	-0.273001	0.80618	2.1197	-0.273001	0.931119
SPVO	HB	652	6	0.999656	1	37	3	105	255	165	210	-0.39794	-0.39794	0.0791812	-0.09691	0.447158	-0.39794	-0.39794	-0.39794	-0.39794	0.20412	0.30103	-0.39794	-0.69897	0.342423	-0.69897	-0.221849	-0.39794	0.146128	0.255273	0.0791812	2.33284	0.146128	0.342423	1.36922	0	0.662758
RPO	HB	635	6	0.0963125	1	72	2	9	255	195	149	-9.64327e-17	-9.64327e-17	-9.64327e-17	-9.64327e-17	-9.64327e-17	-9.64327e-17	1.07918	0.60206	-9.64327e-17	-9.64327e-17	-9.64327e-17	-9.64327e-17	0	-0.176091	0.124939	-0.176091	-0.477121	0.477121	-0.176091	-0.477121	1.52288	0.884607	0.669007	0.884607	0.636822	1.56427
RO	HB	695	6	0.0383594	2	185	1	190	255	198	226	9.64327e-17	9.64327e-17	9.64327e-17	9.64327e-17	9.64327e-17	9.64327e-17	0.778151	9.64327e-17	9.64327e-17	9.64327e-17	0.778151	9.64327e-17	-0.0511525	-0.0511525	-0.0511525	-0.0511525	-0.0511525	0.249877	-0.0511525	-0.0511525	2.19436	1.98627	2.14475	1.53991	1.06279	1.02803
IO	HB	664	6	0.509672	1	19	1	191	255	179	217	-0.221849	-0.221849	-0.221849	0.0791812	0.380211	-0.221849	0.0791812	-0.221849	-0.221849	-0.221849	0.556303	-0.221849	-0.352183	-0.352183	-0.352183	-0.352183	-0.352183	-0.0511525	-0.0511525	0.60206	1.95957	1.62554	1.51114	1.49292	2.18311	1.32906
SUT	HB	622	6	0.26	1	21	3	73	255	186	134	-0.221849	-0.221849	0.0791812	0.0791812	0.0791812	0.0791812	0.0791812	-0.221849	-0.221849	0.255273	-0.221849	-0.221849	-0.176091	-0.477121	0.221849	0.124939	-0.477121	-0.176091	-0.477121	0.425969	1.81068	0.522879	0.477121	2.0518	-0.176091	1.42597
RM	HB	693	6	0.119641	1	25	2	16	255	198	226	-0.221849	-0.221849	0.0791812	-0.221849	0.380211	-0.221849	-0.221849	0.0791812	0.0791812	-0.221849	0.0791812	-0.221849	-0.0511525	0.617854	-0.528274	-0.528274	-0.227244	-0.528274	-0.227244	-0.0511525	1.35822	0.425969	0.8867	0.550907	0.374816	0.99024
LIN	HB	667	6	0.0616875	1	17	3	125	255	179	217	-0.0669468	-0.0669468	-0.0669468	-0.0669468	0.234083	-0.0669468	0.234083	0.234083	-0.0669468	-0.0669468	0.234083	-0.0669468	-0.243038	0.455932	-0.243038	-0.243038	-0.243038	-0.243038	0.234083	-0.243038	1.47297	0.0579919	-0.243038	1.26211	0.359022	1.31326
x	HB	689	6	0.0569687	1	49	3	59	255	179	217	-0.176091	-0.176091	-0.176091	-0.176091	0.425969	-0.176091	-0.176091	-0.176091	-0.176091	-0.176091	-0.176091	-0.176091	-0.176091	0.522879	-0.176091	-0.176091	-0.176091	-0.176091	-0.176091	-0.176091	1.68124	0.124939	0.30103	1.69314	0.778151	0.90309
PSV	HB	607	6	1.09886	1	11	3	108	255	174	111	-0.0669468	-0.0669468	-0.0669468	-0.0669468	0.234083	-0.0669468	-0.0669468	-0.0669468	-0.0669468	0.234083	0.234083	-0.0669468	-0.445864	-0.0198948	-0.0198948	0.307464	-0.922985	-0.0778868	-0.0778868	0.281135	1.00643	-0.144834	0.281135	1.50515	0.307464	1.53641
y	HB	691	6	0.0234531	1	14	3	134	255	179	217	-0.0669468	-0.0669468	0.234083	-0.0669468	-0.0669468	-0.0669468	0.410174	-0.0669468	-0.0669468	-0.0669468	-0.0669468	-0.0669468	-0.09691	0.380211	-0.09691	-0.09691	-0.09691	-0.09691	-0.09691	-0.09691	1.18184	0.20412	-0.09691	1.58433	-0.09691	-0.09691
SLC	HB	636	6	0.0264687	1	8	2	12	255	195	149	-0.0669468	-0.0669468	-0.0669468	0.234083	-0.0669468	-0.0669468	-0.0669468	-0.0669468	-0.0669468	-0.0669468	0.234083	-0.0669468	-0.210853	-0.210853	0.266268	0.0901766	-0.210853	-0.210853	-0.210853	0.266268	1.54502	0.488117	0.789147	0.0901766	0.488117	0.830539
ECU	HB	647	6	0.205156	1	27	3	141	255	165	210	0	0	0	0	0	0	0	0	0	0	0.477121	0	-0.837273	0.639849	-0.360151	-0.837273	-0.837273	0.20412	0.00782534	-0.837273	1.38804	-0.0591215	-0.837273	0.20412	0.625125	0.418
VI	HB	655	6	0.0304531	1	20	3	149	255	179	217	-0.0669468	-0.0669468	-0.0669468	-0.0669468	0.234083	-0.0669468	-0.0669468	-0.0669468	-0.0669468	-0.0669468	-0.0669468	-0.0669468	-9.64327e-17	-9.64327e-17	-9.64327e-17	-9.64327e-17	-9.64327e-17	-9.64327e-17	-9.64327e-17	-9.64327e-17	1.61278	0.30103	-9.64327e-17	-9.64327e-17	0.30103	0.90309
RPA	HB	694	6	0.06775	1	16	2	20	255	198	226	9.64327e-17	9.64327e-17	9.64327e-17	9.64327e-17	9.64327e-17	9.64327e-17	0.30103	9.64327e-17	9.64327e-17	9.64327e-17	9.64327e-17	9.64327e-17	-0.138303	-0.138303	0.162727	-0.138303	-0.138303	0.162727	-0.138303	0.162727	-0.138303	0.338819	1.25964	0.463757	1.35306	0.560667
SG	HB	621	6	0.0173594	1	6	3	82	255	186	134	0	0	0	0	0	0	0	0	0	0	0	0	0.380211	-0.09691	-0.09691	-0.09691	-0.09691	-0.09691	-0.09691	-0.09691	3.4127	1.39445	-0.09691	2.78618	0.681241	1.40824
ACVII	HB	657	6	0.00551562	1	5	3	161	255	179	217	0	0	0	0	0	0	0	0	0	0	0	0	-0.09691	0.380211	-0.09691	-0.09691	-0.09691	-0.09691	-0.09691	-0.09691	2.50188	0.20412	-0.09691	2.61574	-0.09691	0.60206
ICB	HB	663	6	0.0540313	1	4	3	153	255	179	217	0	0	0	0	0	0	0	0	0	0	0	0	0.338819	-0.138303	-0.138303	-0.138303	-0.138303	0.162727	-0.138303	-0.138303	2.22343	-0.138303	-0.138303	1.47448	0.162727	0.338819
ISN	HB	666	6	0.0071875	1	1	2	30	255	179	217	0	0	0	0	0	0	0	0	0	0	0	0	-0.138303	-0.138303	-0.138303	-0.138303	-0.138303	-0.138303	0.162727	0.338819	0.81594	-0.138303	-0.138303	-0.138303	-0.138303	-0.138303
PPY	HB	683	6	0.0946562	1	2	3	151	255	179	217	0	0	0	0	0	0	0	0	0	0	0	0	-0.0511525	-0.0511525	-0.0511525	-0.0511525	-0.0511525	-0.0511525	0.249877	-0.0511525	-0.0511525	0.550907	-0.0511525	1.32906	-0.0511525	-0.0511525
