# Supplementary material for: Comparative brain-wide mapping of ketamine- and isoflurane-activated nuclei and functional networks in the mouse brain
Source: eLife. 2024 Mar 21;12:RP88420. doi: 10.7554/eLife.88420 (PMC10957177; doi:10.7554/eLife.88420)
Supplement: Figure 6—source data 2. [file elife-88420-fig6-data2.xlsx]

## Sheet: Figure 6-source data 1
Figure 6—source data 2. Z values of the log relative c-Fos density in 201 brain regions in response to KET and ISO, related to Figure 6E.
Name	Group	ID	GroupID	Volume	ISOCluster	ISOOrder	KetCluster	KetOrder	Color_1	Color_2	Color_3	ISO_1	ISO_2	ISO_3	ISO_4	ISO_5	ISO_6	Ket_1	Ket_2	Ket_3	Ket_4	Ket_5	Ket_6
PA	CTX	369	1	0.965953	2	92	3	32	151	236	147	3.45665	0	3.14679	2.63732	3.2984	4.95508	7.18765	0.133822	-0.702507	5.37702	3.52475	6.47396
PIR	CTX	311	1	11.5657	2	116	1	162	106	203	186	5.11457	0.934791	4.94851	1.13291	5.38208	2.095	7.46462	5.5773	4.55129	4.9098	4.73838	7.11893
DG	CTX	329	1	6.59745	2	141	3	48	126	208	75	2.27741	-1.84479	1.10917	1.18879	3.69209	2.81543	7.16808	2.42192	2.357	5.20625	2.70732	4.59159
ENT	CTX	336	1	11.4094	2	118	1	173	50	184	37	4.09627	3.0852	4.54431	0.645888	3.34791	1.8617	8.31184	5.6085	5.52614	6.75407	5.54682	7.41048
MOB	CTX	301	1	16.4632	2	98	1	187	154	210	189	3.53276	-5.25242	4.19725	4.03119	6.68699	3.81786	8.33635	7.26022	6.35533	1.85679	3.23267	3.75357
CA	CTX	325	1	16.9484	2	157	3	60	126	208	75	2.0916	-3.33303	-0.151632	0.0458438	3.58732	1.38334	7.93444	3.19433	2.36595	6.72382	3.55207	5.6504
AON	CTX	306	1	4.8697	2	122	1	189	84	191	148	3.46503	0.30468	3.8385	-0.0903016	5.00852	0.957348	8.03322	6.94416	5.89872	5.13422	5.36396	6.12408
TT	CTX	307	1	1.44423	2	117	1	164	98	208	159	4.62129	2.56632	4.33712	2.3293	4.73677	1.98173	6.42767	6.50521	5.73088	5.72288	3.42251	5.07695
ECT	CTX	294	1	1.71188	2	123	2	7	13	159	145	4.30187	-2.44004	4.62914	0.287706	4.50961	1.55547	5.29833	4.37504	4.35111	4.45722	3.74251	4.64172
RSP	CTX	247	1	10.501	1	26	1	178	26	166	152	0.642444	-2.67162	1.4418	-1.041	1.65902	1.88512	7.94505	4.74081	3.78008	6.63695	5.85114	7.36184
ILA	CTX	203	1	0.843172	2	125	1	163	89	179	99	4.44499	2.80944	4.74144	3.68759	5.47578	3.76273	7.09351	6.17852	6.09909	6.33281	3.70371	4.61859
SUB	CTX	352	1	2.10358	1	68	1	179	79	194	68	2.89137	0.957462	2.46317	0.25716	1.4644	-0.0966271	8.00282	6.01627	5.40492	6.25449	3.48559	6.79642
TEa	CTX	281	1	3.10627	2	170	1	168	21	176	179	3.36362	-2.17269	3.87317	0.131254	4.15685	1.10633	6.3588	3.99869	3.39265	5.18211	3.61258	5.87046
COA	CTX	316	1	3.26505	2	101	3	70	97	231	183	2.31445	-0.387002	2.67055	2.06449	4.82073	2.28924	7.92181	1.93525	1.28026	6.56828	3.31344	6.15057
ORB	CTX	209	1	5.90188	2	107	1	192	36	138	94	2.09877	0.063073	2.85398	1.64188	3.53711	2.37539	10.4082	6.2753	5.79448	8.38065	6.6215	7.99763
SS	CTX	26	1	33.3322	1	81	1	201	24	128	100	-1.82898	-3.37483	-5.04258	-3.70195	2.87917	1.942	12.4928	8.04553	6.551	9.81515	9.31092	11.3475
MO	CTX	13	1	24.4574	1	30	1	197	31	157	90	-0.93261	-2.38002	0.548253	-2.61072	1.79993	2.88637	11.2526	7.97116	6.70431	9.35836	7.93951	9.46777
VIS	CTX	127	1	13.4591	1	33	1	170	8	133	140	0.442698	-4.48147	-0.585299	0.104747	1.18929	0.0334059	7.12853	5.03174	4.15262	5.73992	4.28418	6.93872
PERI	CTX	288	1	0.790078	2	119	1	165	14	150	132	3.26358	1.77992	3.4915	1.85486	4.20573	1.92135	6.51891	5.48837	4.43055	5.09718	5.11676	5.64297
AUD	CTX	98	1	5.80086	1	70	1	171	1	147	153	2.73639	-0.0846176	3.01512	-1.06463	2.9805	-1.00013	7.15693	5.01599	4.00451	6.32802	4.13656	6.11742
AOB	CTX	302	1	0.651531	2	163	1	188	157	240	210	-3.18282	-3.10748	2.03346	1.15313	6.31622	1.7529	7.23688	7.44207	7.16006	3.14018	1.37486	4.39228
BMAp	CTX	368	1	0.717328	2	144	3	83	132	234	129	1.79697	1.09021	0.33768	1.31866	4.19675	2.47754	6.08573	2.04732	0.601179	4.68841	1.14527	5.29745
TR	CTX	322	1	1.39856	1	79	3	51	168	236	211	2.19465	-4.38042	1.1654	-2.16769	2.20151	-4.5139	7.84776	2.16203	0.933863	5.79632	3.24763	6.37513
PL	CTX	197	1	2.40823	2	172	1	174	47	168	80	3.59231	-1.40641	3.55028	-0.771368	4.22722	2.37539	9.46128	6.45724	5.1591	7.24262	5.47692	6.13464
ACA	CTX	184	1	5.53983	2	184	1	175	64	166	102	2.06618	-0.119656	1.23834	-3.83321	2.80711	3.16201	8.83697	5.86346	4.97282	7.79522	5.80765	7.86269
LA	CTX	361	1	0.83875	1	28	3	85	144	235	141	3.10386	-3.5326	-0.984526	-0.813181	2.70316	1.52533	6.82851	1.39033	1.02293	5.0787	3.04134	2.23162
DP	CTX	310	1	0.501812	2	126	1	181	164	218	164	3.325	3.49448	4.87108	3.56097	4.25125	3.20217	7.27021	5.63562	6.09714	7.64203	4.64246	5.71343
PAA	CTX	321	1	1.19125	2	108	3	53	89	218	171	2.36652	-1.99911	3.40265	2.95898	5.09152	1.14214	7.79335	1.66558	0.847646	5.43825	2.95318	5.99032
POST	CTX	350	1	1.08038	1	38	3	61	72	200	60	-1.62767	-0.774004	-3.82215	0.346853	0.0758854	-0.398795	7.57281	1.97911	2.17487	6.02645	3.11338	7.16967
AI	CTX	228	1	7.89742	2	147	1	194	33	152	102	1.11664	-1.70107	0.411514	0.517334	3.13802	3.46164	10.342	5.41373	4.61998	7.55344	5.78221	8.72777
BMAa	CTX	367	1	0.768109	2	143	3	39	132	234	129	2.62565	1.45032	-1.17006	3.33408	3.39086	1.49451	6.62904	-2.62996	-0.578545	5.84707	4.44449	4.63764
PAR	CTX	349	1	0.932656	1	78	1	182	114	213	105	4.54257	1.01941	3.04913	0.346853	0.784506	-2.1517	8.35862	3.08356	4.48788	7.01173	2.88347	8.06368
NLOT	CTX	312	1	0.318672	2	176	3	104	149	228	200	3.85303	-1.20214	1.66252	-0.547294	3.11399	1.00013	7.7481	-0.454968	0.780016	4.20743	2.73728	6.22792
PRE	CTX	351	1	0.923969	2	120	3	66	89	185	71	6.08081	0.498932	3.58214	1.86596	1.89774	3.20217	8.60058	2.59613	4.25323	6.74383	3.40049	6.57321
PTLp	CTX	266	1	2.454	1	45	2	17	0	159	172	0.404627	-3.41564	-0.268883	-2.42806	1.78184	-3.51972	4.44871	7.99436	6.83598	3.94877	-3.04263	0.14371
GU	CTX	84	1	1.76869	2	150	1	198	0	156	117	0.957454	0.435859	-0.233274	-0.29326	4.25125	3.32547	11.4419	7.11901	5.51853	8.38266	7.13283	9.97615
CLA	CTX	357	1	0.551297	2	187	1	180	138	218	135	1.0891	-1.34096	1.77466	-0.152275	3.61013	2.09585	7.85632	5.07662	4.39628	5.54774	5.3577	7.59175
FRP	CTX	7	1	0.972297	1	73	2	21	38	143	69	-0.907412	-0.885934	4.03628	-0.971809	1.69388	-0.91293	6.18288	4.64252	3.37581	2.166	0.660072	-3.54035
IG	CTX	334	1	0.124344	2	145	3	74	126	208	75	1.23128	2.79128	-3.36017e-16	2.63732	4.45511	1.23877	6.93401	3.04775	1.61878	7.74509	3.16908	6.56711
VISC	CTX	91	1	2.35342	1	31	1	196	17	173	131	-0.907412	-0.885934	-0.773026	-0.971809	1.13727	1.05047	11.3097	5.53897	2.64786	8.20123	7.2513	9.57404
FC	CTX	333	1	0.0616719	1	3	3	93	126	208	75	0	0	0	0	0	0	4.95555	0.388848	4.66509	5.02973	1.19387	2.02643
BST	CNU	407	2	1.3405	2	129	3	54	179	192	223	4.62498	3.09284	3.54554	3.6905	4.8914	4.95601	6.93479	3.04601	1.14657	6.42704	1.9194	4.65075
CEA	CNU	388	2	1.3177	2	198	3	152	128	192	226	5.88661	4.45328	5.17965	6.77954	7.32735	7.12174	7.25674	-1.46206	-2.32225	4.90987	3.07168	4.37784
LSr	CNU	381	2	1.88098	2	130	2	4	144	203	237	4.58857	2.62697	4.21711	4.38321	4.62759	5.0608	5.50639	3.03332	2.79746	4.22912	1.67426	3.99345
SI	CNU	399	2	3.02784	2	127	1	193	162	177	216	4.63446	2.17736	3.52948	2.96614	4.78953	4.3368	10.3132	6.23402	6.1519	7.56273	5.35891	8.67185
ACB	CNU	375	2	4.39827	2	131	1	199	128	205	248	3.94562	1.87352	3.76038	3.66704	5.99339	4.4811	9.78794	6.70913	6.88562	8.24562	6.12153	8.1159
OT	CNU	377	2	3.81906	2	138	1	200	128	205	248	5.2304	4.18996	6.58517	5.49872	7.37382	4.28544	10.1822	7.46316	6.81865	6.29177	5.53517	9.75804
LSc	CNU	380	2	0.562781	2	178	3	101	144	203	237	1.90149	0.703205	2.35792	0.771368	1.77287	2.96353	4.06082	2.63658	2.09656	4.92744	0.39153	1.39344
AAA	CNU	386	2	0.494563	2	96	3	63	128	192	226	2.81397	1.09021	1.66252	1.836	5.03576	3.7713	8.87677	2.31912	1.40501	4.57883	3.56851	7.04427
FS	CNU	376	2	0.431766	2	99	1	176	128	205	248	4.86053	-0.267346	0.815657	3.40869	5.59237	3.65131	10.1084	5.64026	4.35154	7.15453	5.73635	7.08231
MA	CNU	400	2	0.364578	2	174	1	183	162	177	216	3.99911	2.17269	1.38661	-1.31866	2.91013	2.47754	10.4169	4.22275	2.51667	5.82513	4.75704	7.77279
IA	CNU	392	2	0.182828	2	151	3	111	128	192	226	0.550948	-2.25337	2.02746	1.90871	2.59223	2.94017	5.17699	-0.785149	-0.227969	5.12781	1.37623	1.54522
MEA	CNU	393	2	2.02769	2	97	3	106	128	192	226	4.14917	0.804656	1.12016	2.28588	5.69084	2.84593	6.70738	0.911098	-0.517078	5.74318	2.43978	3.25112
CP	CNU	373	2	26.0193	2	154	1	195	152	214	249	2.70268	-0.94788	-0.574277	1.41624	4.85813	3.13834	9.94774	6.03518	4.84014	9.30763	6.7982	7.67668
SF	CNU	383	2	0.474187	2	188	3	52	144	203	237	-0.273828	-1.46948	3.86478	-1.61192	0.48625	4.62284	7.49363	3.1925	0.814326	6.23043	3.24745	5.41472
BA	CNU	387	2	0.0250469	2	192	3	159	128	192	226	4.55628	0	0	3.95599	0	6.95533	9.32963	-2.13383	-1.97418	8.83812	-0.0794909	5.23517
SH	CNU	384	2	0.0371875	1	74	2	10	144	203	237	1.04412	1.01941	1.32484	-0.971809	3.46675	-0.91293	2.69875	2.74602	4.10127	4.57444	2.53004	4.0904
GPe	CNU	396	2	1.56428	1	47	1	186	133	153	204	-1.37347	-1.34096	-1.17006	0.619092	-0.154869	-1.38182	8.49197	4.18287	1.96646	9.5878	6.17037	7.34151
TRS	CNU	405	2	0.356312	1	80	3	72	150	167	211	2.85895	-1.90534	2.33114	-2.09003	-0.784506	-1.9634	7.85864	1.99976	-0.551751	7.47796	4.85832	5.19299
BAC	CNU	408	2	0.00754687	1	9	3	127	179	192	223	-0.273828	-0.267346	-0.233274	-0.29326	1.82737	-0.275493	6.13282	-0.759318	-0.702507	5.31094	-0.789545	0.518686
GPi	CNU	397	2	0.423438	1	10	3	40	133	153	204	1.23128	-0.703205	-0.613585	0.547294	-0.784506	0.514136	6.32364	0.645786	-1.30598	7.85508	3.80548	1.14043
LSv	CNU	382	2	0.607594	1	55	3	120	144	203	237	-0.972808	-3.35406	-1.03081	-0.817771	0.983692	2.40054	5.52605	0.557416	-1.88618	4.42098	2.36386	4.8775
PVT	TH	458	3	0.444219	2	103	2	11	255	144	159	2.4491	0.53266	2.06201	1.67412	2.45782	3.05597	3.06155	3.17806	2.3147	2.01776	2.91993	3.7622
RE	TH	460	3	0.424484	2	93	1	167	255	144	159	2.98219	1.9221	2.25141	2.34868	5.0791	4.18986	5.41243	4.77321	3.99288	4.5303	4.92671	6.78842
GENv	TH	470	3	0.523125	1	83	3	154	255	144	159	-4.06789	-5.17374	-5.5633	0.161515	0.640491	1.60561	10.6625	0.231705	-2.01696	4.62425	0.817835	2.16193
ILM	TH	462	3	1.60608	1	60	1	172	255	144	159	0.24012	-1.15709	-2.45559	-0.650153	2.45276	2.67229	7.61758	4.7801	3.79901	6.02738	2.89613	5.52741
PT	TH	459	3	0.229781	2	100	2	3	255	144	159	2.38532	2.73883	1.17253	3.80876	4.51988	4.5693	5.50477	2.96888	1.81892	3.52689	3.78919	6.00637
MED	TH	452	3	2.01323	2	148	3	75	255	144	159	1.48135	-1.01136	-0.400556	1.13291	3.22758	2.78247	8.31965	3.02143	1.70466	6.6979	4.30774	6.83803
LH	TH	477	3	0.345828	2	158	3	95	255	144	159	-3.02825	0.649837	1.13797	0.547294	1.66434	2.11891	6.08914	2.67816	1.7876	4.10419	1.43503	3.09067
SPF	TH	422	3	0.203844	2	194	3	87	255	128	132	1.74231	-1.90534	1.74434	1.74318	4.57998	5.2622	6.28694	2.35673	1.13022	4.55115	1.75962	3.06894
MH	TH	476	3	0.320188	2	132	3	102	255	144	159	0.720254	2.48889	4.82811	4.11556	4.65703	5.44107	5.72838	3.49847	0.498437	5.19648	1.04956	0.518686
ATN	TH	443	3	2.15848	1	65	1	184	255	144	159	0.246624	-2.36776	-3.11493	-0.213981	3.93923	4.08442	9.3432	5.4531	1.95296	7.08291	4.39717	8.34412
VENT	TH	413	3	4.85839	1	66	3	71	255	128	132	-1.82368	-2.27945	-2.60253	1.20155	2.8215	2.94437	7.8534	3.02071	-0.0440248	6.74559	3.99973	5.6753
LAT	TH	437	3	3.07977	1	84	1	177	255	144	159	-2.19694	-1.87759	-3.53409	-5.76154	-2.39292	0.267238	8.9984	5.49767	4.42333	7.20403	5.55908	7.20386
GENd	TH	427	3	1.42195	1	87	3	67	255	128	132	-1.52314	-3.65978	-4.24229	-0.605835	0.372207	-1.8079	8.71513	4.0212	3.85684	6.56108	2.36483	5.51167
RT	TH	469	3	1.44725	1	63	3	79	255	144	159	-1.62767	-2.79128	-2.43554	-0.971809	3.70892	2.18709	9.43241	2.08433	-1.1272	8.00619	3.77705	5.91011
SPA	TH	425	3	0.132094	2	166	2	1	255	128	132	-1.50511	-1.46948	-0.233274	1.79677	4.05761	3.83961	5.29678	3.08974	2.50854	3.873	3.43681	4.99893
PP	TH	426	3	0.0614375	1	46	3	107	255	128	132	0.32387	-1.58914	-1.38661	-1.74318	-1.77287	-1.63756	5.65313	1.24044	-0.0533148	4.94771	1.28982	5.51761
SO	HY	480	4	0.0468438	2	201	3	55	255	93	80	9.40061	8.90965	7.74726	9.08392	10.1342	8.67487	6.58456	0.437493	0.40476	6.16785	4.24409	4.90145
PVH	HY	482	4	0.188688	2	133	3	103	255	93	80	3.39442	3.27657	3.30669	4.76705	5.47629	5.31358	4.59203	1.81992	0.463878	3.81172	2.09329	3.17463
LHA	HY	524	4	2.07141	2	113	3	89	242	72	59	2.56314	1.00626	2.31637	3.10926	3.85159	3.01323	5.55991	1.68108	1.09704	4.50616	0.155374	2.44803
MPO	HY	492	4	0.556953	2	114	3	96	255	85	71	3.03572	1.29167	2.22514	3.19561	3.42792	2.36456	6.40193	3.63547	1.82078	3.16257	-0.445015	4.76094
AHN	HY	504	4	0.710406	2	186	3	113	255	76	62	1.71123	0.069382	1.38538	0.634559	2.25543	1.21305	6.12657	-0.861443	-1.37384	3.83078	1.90857	3.65087
SBPV	HY	498	4	0.1095	2	104	3	139	255	85	71	1.94099	0.831732	2.01977	2.34266	2.85987	2.31722	3.8885	-2.58257	-0.775334	2.3298	1.70633	2.90092
DMH	HY	490	4	0.376063	2	94	3	135	255	85	71	3.86824	1.5099	1.76202	3.03205	3.68837	3.73786	5.2013	1.1556	0.717202	4.37653	-0.867378	1.07912
TU	HY	531	4	0.523438	2	199	3	123	242	72	59	5.56118	5.34324	5.7112	8.77364	7.97138	5.7447	7.14179	0.538745	-0.822044	5.4562	1.26121	2.9725
SCH	HY	499	4	0.0660781	2	180	3	144	255	85	71	1.4714	1.42156	2.20823	1.74818	2.70439	1.81643	3.52201	1.83681	-0.0990324	1.64825	2.88014	3.19681
PH	HY	522	4	0.707047	2	142	3	145	255	76	62	2.09582	-1.72796	1.47698	1.04361	2.38956	3.86622	3.44138	2.46142	1.86541	2.87557	0.65441	2.57694
ARH	HY	485	4	0.286328	2	139	3	88	255	93	80	6.13943	3.86024	4.64438	5.95061	4.94975	5.05885	6.55709	2.25469	1.92471	6.17958	2.54961	0.189963
LPO	HY	525	4	0.554984	2	109	3	68	242	72	59	2.28064	0.972743	1.47757	2.00393	3.9358	2.89208	9.34957	5.1465	2.85186	5.78039	2.51656	6.16597
RCH	HY	529	4	0.147641	2	121	3	56	242	72	59	3.94693	2.82562	3.01856	2.13701	3.31591	2.98888	7.56664	1.34112	1.07564	5.49421	1.3945	4.86854
VMH	HY	521	4	0.549516	2	102	3	114	255	76	62	0.720254	0.629393	3.15857	2.75266	4.15484	2.50525	5.67971	-0.658671	-0.090923	5.01782	1.29727	2.11913
VLPO	HY	502	4	0.0670469	2	200	3	86	255	85	71	6.91329	6.88575	6.82623	8.18817	8.5497	7.43261	5.41915	1.29806	0.702507	4.28588	1.78425	5.05441
PVpo	HY	497	4	0.143094	1	69	3	146	255	85	71	1.61804	2.04055	2.32528	1.77378	1.28811	-0.63055	4.94084	2.03622	1.01623	2.34647	2.47558	1.97853
MPN	HY	517	4	0.404625	2	171	3	115	255	76	62	3.03558	1.05838	2.10644	0.936901	1.89223	1.27893	6.04933	0.353176	-0.759913	3.85198	2.01398	3.03814
PVi	HY	484	4	0.200406	2	146	3	117	255	93	80	1.97333	0.997864	1.25799	2.52858	2.85358	2.6358	6.55211	0.152337	-1.76251	5.58466	1.15311	1.06767
ZI	HY	532	4	1.8007	2	167	3	109	242	72	59	-0.36379	0.399801	-0.309913	2.01823	3.18435	3.35031	6.55645	1.40052	-0.221098	5.02844	1.22692	4.03404
MEPO	HY	491	4	0.0405469	2	106	3	65	255	85	71	1.541	1.20214	2.02403	1.79677	2.2734	3.28531	9.34542	5.06819	2.35688	5.38018	0.704498	4.43341
AVPV	HY	489	4	0.182984	2	128	3	110	255	85	71	3.70767	1.79341	3.66271	4.01453	2.55737	3.68816	6.84962	2.44623	-0.574108	4.64066	-0.155864	4.75156
MBO	HY	505	4	1.01611	2	181	3	58	255	76	62	2.08318	-2.54309	2.68206	2.42465	1.88841	2.38948	6.44295	1.69167	1.00858	5.83819	2.11046	4.65671
PVa	HY	483	4	0.0498594	1	41	3	156	255	93	80	-3.81887	-2.52634	-0.673525	-1.70659	1.94872	-0.795421	8.67853	-0.261734	-3.03066	5.45025	1.73278	4.53176
PVHd	HY	520	4	0.130766	2	193	3	128	255	76	62	0.101534	1.30127	0.521843	4.35799	4.91846	4.77552	6.63616	-1.33121	-2.43255	3.04358	3.14081	2.13238
PSTN	HY	527	4	0.166063	1	67	3	122	242	72	59	-1.23128	-2.40427	-0.435346	0.424514	0.784506	4.74806	6.72234	0.846437	-0.58297	3.42637	0.694538	5.03084
PVp	HY	496	4	0.126969	2	110	3	84	255	85	71	4.11735	-1.34096	1.77466	2.48505	2.26901	3.97205	6.78393	1.37777	3.17813	5.21699	-0.146479	3.64152
ADP	HY	487	4	0.0997656	2	175	3	126	255	85	71	1.84384	0.598063	2.95739	1.08055	2.9477	1.34092	6.73592	2.76649	-2.87304	3.46903	0.560191	5.95817
PMv	HY	519	4	0.19575	2	195	3	77	255	76	62	1.04412	-0.885934	1.32484	4.30284	4.25125	4.52814	10.2974	2.84619	3.57511	7.9324	1.12038	6.13039
AVP	HY	488	4	0.0921562	2	153	3	121	255	85	71	1.00895	2.1872	-1.57602	2.74606	3.22458	0.616287	6.43665	-0.909215	1.69938	4.3676	-1.73495	4.9521
PMd	HY	518	4	0.131766	1	57	2	23	255	76	62	-0.720254	-2.60855	-0.613585	-1.54274	0.854871	2.57416	5.17505	3.17196	2.51371	-3.54204	0.780871	2.70379
PS	HY	495	4	0.0964531	2	159	3	37	255	85	71	2.04265	0.405162	-1.74434	0.86895	0.452005	2.05507	6.97137	0.462297	-1.97418	5.43683	1.83044	6.89354
OV	HY	493	4	0.00875	1	71	2	28	255	85	71	0.511028	3.99341	1.04893	1.31866	-0.784506	-0.724633	-0.216776	-0.220573	0.996873	2.0076	-0.229354	-0.212361
STN	HY	530	4	0.194734	2	149	2	2	242	72	59	2.13869	-0.703205	-0.613585	0.547294	2.68224	2.99167	6.41364	2.98497	2.96571	2.3113	1.75406	6.75866
SFO	HY	500	4	0.0215937	2	182	3	43	255	85	71	0	0	3.62871	2.09003	0	3.71631	9.61387	0.88018	1.51683	7.37459	-0.434518	3.10612
PD	HY	494	4	0.0116094	1	75	2	29	255	85	71	0	0	2.71145	0	0	0	4.65901	1.00938	-0.969588	-0.885674	0.26002	-1.00898
PST	HY	526	4	0.01275	1	12	3	118	242	72	59	0.957454	-0.267346	-0.233274	-0.29326	-0.298255	-0.275493	8.06499	0.88018	0.111819	5.51119	-1.22406	0.116362
ASO	HY	481	4	0.0060625	1	15	3	129	255	93	80	1.23128	0	0	0	0	0	6.78927	0.120862	-1.08912	4.09948	0.125673	1.36609
IPN	MB	591	5	0.356516	2	173	3	136	255	166	255	1.72446	3.1755	2.88295	-2.71498	2.93576	3.40471	6.08395	2.98497	0.548953	3.8527	-3.80074	0.961101
ICc	MB	542	5	1.1263	1	82	3	142	255	122	255	-3.0943	-8.53281	-1.61897	0.794372	0.462568	1.70665	4.30555	0.237407	0.0123576	1.15008	-4.52935	2.06265
SCsg	MB	539	5	1.15198	1	86	3	92	255	122	255	-4.25504	-4.47053	-3.2872	-2.87833	-2.79832	-1.00579	5.79395	0.538745	0.640717	3.62889	0.977086	5.56273
ICe	MB	544	5	1.99797	1	39	3	143	255	122	255	-2.55627	-4.58383	-0.348184	0.41698	-0.27923	0.322303	5.0741	-0.997683	-1.46366	1.4838	-4.11208	3.46626
SCig	MB	560	5	2.03683	1	32	3	132	255	144	255	-0.156662	-2.3819	-1.0294	0.590047	-0.686519	1.17377	4.63726	0.0517833	-1.35317	3.0818	-0.854305	4.17828
ICd	MB	543	5	1.32262	1	58	3	140	255	122	255	-2.30064	-5.20276	1.06144	0.257977	1.23383	2.09902	4.87856	-1.02818	0.0157271	1.52072	-1.86893	3.93518
SCzo	MB	540	5	0.363312	1	89	3	97	255	122	255	-2.09132	-4.35714	-4.13952	-2.96169	-0.936762	-0.109554	5.33357	1.99775	2.61089	3.69214	1.24722	4.71585
SCdg	MB	557	5	1.19505	1	59	3	138	255	144	255	-0.304022	-0.367624	-1.98329	0.792624	-0.255257	1.63354	4.55098	0.484676	-0.103338	2.594	-1.9004	3.73855
SCop	MB	538	5	0.643047	1	42	3	130	255	122	255	-1.27995	-2.768	-0.969266	-2.39619	-1.74689	0.675667	4.92057	-0.617828	-1.32362	3.3711	0.100867	4.95971
EW	MB	578	5	0.026	2	134	2	5	255	144	255	2.54923	3.10748	3.51444	6.4321	3.97438	5.96792	6.62995	4.51121	1.97249	5.11733	0.607115	3.6122
PRC	MB	562	5	0.171375	1	40	3	150	255	144	255	-0.53553	-0.340125	-3.78125	-2.11627	0.529928	1.78325	3.86019	0.731979	-1.22624	2.25034	2.12985	2.02381
SCiw	MB	559	5	2.09277	1	61	3	158	255	144	255	-0.511028	-1.08248	-1.71755	0.630383	1.56901	1.68791	5.82786	-1.97389	-4.0375	4.32171	0.0868163	5.35724
MPT	MB	568	5	0.0440781	1	43	2	13	255	144	255	-0.511028	-3.10748	-1.32484	-1.0254	-1.34112	-0.514136	3.01397	4.71204	2.22848	4.2909	-1.08972	3.14254
VTA	MB	552	5	0.427578	2	189	3	69	255	144	255	1.475	0.366477	0.319771	0.656034	1.28336	1.18542	7.06168	5.37277	3.68343	6.95579	0.26002	6.41757
DR	MB	602	5	0.153344	2	191	3	124	255	166	255	1.55515	1.78569	-1.38661	2.43688	-0.431745	0.839974	7.21611	0.265869	0.982128	5.63527	-0.756817	3.09297
NPC	MB	570	5	0.288813	1	34	3	90	255	144	255	1.31795	-0.885934	-2.87089	-2.29047	1.29214	0.724633	5.71986	2.17012	0.768729	3.59548	-0.442966	3.10946
APN	MB	567	5	1.27603	1	88	3	64	255	144	255	-2.57026	-3.71155	-3.23854	-2.75266	-2.01504	1.69955	5.91502	3.92322	1.86697	6.88623	1.63244	6.82794
SNr	MB	551	5	1.54812	2	115	3	76	255	144	255	4.48661	2.17269	1.89579	2.8614	2.68224	2.87633	7.5162	2.94507	2.95174	7.42771	1.93325	6.30743
NOT	MB	569	5	0.205609	1	85	3	45	255	144	255	-2.53508	-3.67721	-3.20857	-2.71498	-4.10235	-0.587091	9.65251	1.68691	1.32934	6.97724	-0.510891	3.94608
CLI	MB	601	5	0.0834375	2	183	3	41	255	166	255	1.55515	3.10748	-0.773026	2.09003	5.71725	-0.91293	6.41761	2.03946	-2.55715	5.71603	2.52497	5.41153
RL	MB	600	5	0.0554062	2	196	3	94	255	166	255	1.95154	2.79128	0	3.40869	3.765	4.44094	4.2607	1.80732	0.551751	3.68326	2.63765	5.61361
SNc	MB	587	5	0.197328	2	160	3	62	255	166	255	0.446426	0.934791	-1.28221	1.79677	1.82737	0.449141	8.48791	3.4567	2.54057	6.09342	0.560191	6.42732
SCdw	MB	558	5	0.332547	2	164	3	131	255	144	255	0	1.20214	-1.04893	0	2.12563	2.68804	5.56766	0.399166	-1.41461	3.62128	-1.79504	4.41603
RN	MB	575	5	0.788172	1	52	3	44	255	144	255	-2.53508	-0.56973	-2.15964	-2.71498	-0.0789836	-2.55049	7.36239	1.83681	-1.47574	6.64918	1.57042	6.68904
OP	MB	571	5	0.0583281	1	50	2	14	255	144	255	-0.816297	-1.99911	-1.74434	-0.874227	0.883749	-2.06003	4.05051	4.27547	2.66096	3.65435	1.41156	2.66601
ND	MB	564	5	0.0917344	2	161	3	49	255	144	255	-0.720254	2.08807	-0.613585	2.29047	0.556616	1.23877	7.1586	3.21132	2.30285	5.94033	2.2101	5.04833
VTN	MB	581	5	0.0377813	2	190	3	112	255	144	255	2.85895	0	0	0	0	2.47754	7.67066	1.00938	-0.969588	2.59175	-1.08972	3.61558
IF	MB	590	5	0.0868594	1	18	3	46	255	166	255	0.32387	-0.885934	-0.773026	0.346853	-0.98836	0.325839	8.06907	0.120862	-0.590688	7.17615	1.77558	6.49192
PPT	MB	572	5	0.144141	1	29	3	119	255	144	255	-0.511028	-0.498932	-0.435346	-0.547294	1.56901	1.44927	6.53296	2.77461	-2.29007	4.09948	-1.78425	4.89056
INC	MB	563	5	0.0794688	1	7	3	42	255	144	255	0	0	0	0	0	0	6.93305	0.417883	-1.92357e-16	5.7148	0.789545	4.97054
CS	HB	630	6	0.599031	2	140	3	98	255	195	149	4.4141	5.34646	4.37396	5.44018	4.30901	5.37004	2.49808	2.68325	0.933863	5.21447	2.87662	6.37305
NTS	HB	649	6	0.849281	2	136	2	15	255	165	210	3.90307	3.67026	4.15741	5.30999	5.16063	6.8463	5.96183	2.45279	1.74439	1.77712	3.82113	3.83264
PB	HB	608	6	1.12134	2	152	3	47	255	174	111	0.124908	-0.0115237	0.879435	3.56581	1.89453	2.17521	8.76033	-0.0883272	-0.335723	6.89831	2.97002	6.09976
PG	HB	619	6	0.964047	1	90	2	22	255	186	134	-7.40152	-6.02418	-5.25643	-3.19942	-0.273418	-7.44652	4.73456	1.85548	-0.952313	-3.35246	2.0852	5.75806
VNC	HB	684	6	3.20811	1	76	3	78	255	179	217	0.0973594	1.58425	0.831558	0.998416	1.01542	-2.17705	9.85092	3.20555	2.62932	7.9202	2.98575	6.13936
GRN	HB	662	6	2.61678	1	51	3	50	255	179	217	-0.788584	-3.77827	-0.0288254	-4.1445	1.64458	-0.0340423	8.37871	2.26174	2.59746	5.64692	2.36636	3.84847
LRN	HB	668	6	0.569766	1	48	2	8	255	179	217	-1.88876	-4.24833	1.60708	-3.34146	0.852881	0.884418	6.14661	3.49266	4.14627	5.04814	3.90753	1.67094
PCG	HB	618	6	0.543375	2	156	3	99	255	186	134	2.88607	-3.74523	0.830138	3.40869	3.05352	3.51652	5.77223	2.70767	0.893789	3.52926	3.2945	4.89166
PRNc	HB	620	6	2.34809	1	62	2	6	255	186	134	0.396384	-0.498932	-2.53321	2.54599	1.08276	1.00013	3.38504	2.99045	2.50692	6.12605	1.38989	5.98087
IRN	HB	665	6	2.77605	1	56	3	57	255	179	217	0.585275	-4.53517	-1.85932	-0.59427	3.04677	1.0793	7.33109	1.36874	1.09799	6.10117	2.73656	4.31071
MDRN	HB	672	6	2.032	1	35	3	80	255	179	217	-3.01022	-2.44004	1.01773	-1.35789	-0.59651	1.85049	10.2858	-2.20728	1.06226	8.1775	6.9946	5.22663
AP	HB	640	6	0.0530781	2	137	2	24	255	165	210	0	5.10659	4.67764	6.53291	5.10612	8.36774	0	5.07139	0	0	5.6283	0
PRNr	HB	634	6	2.3635	1	44	3	91	255	195	149	-2.12383	-1.37035	-2.42288	-1.98129	-0.8173	-0.754925	2.12025	1.56289	-0.724578	5.26149	1.2998	5.25141
NLL	HB	606	6	0.723875	2	197	3	33	255	174	111	-1.62767	2.72048	-1.38661	4.3805	5.98064	5.67971	8.22028	0.933185	0.738063	5.08431	-1.08042	5.74144
DMX	HB	661	6	0.174047	2	135	2	18	255	179	217	5.47052	1.40641	2.88969	6.32221	5.33401	5.7347	6.18467	1.41893	4.41716	-0.994865	4.50952	4.74092
TRN	HB	623	6	0.68975	1	91	3	116	255	186	134	-5.30665	-2.07356	-4.52074	-1.50318	-4.43892	-5.33891	4.86474	0.992737	-1.65683	3.54041	1.39114	5.64838
CN	HB	641	6	1.62886	2	124	3	160	255	165	210	2.13869	-0.703205	5.14699	2.93058	6.89733	-0.724633	9.02536	-1.63392	-1.07624	7.41365	0.245434	4.0348
DCN	HB	644	6	0.415219	1	77	2	25	255	165	210	-1.74231	-1.70107	4.92314	-1.86596	-1.89774	2.83109	2.29421	3.32811	0.572175	-1.67136	5.63768	-1.90404
PAS	HB	676	6	0.0279688	2	105	2	26	255	179	217	-1.07672	4.46052	3.27847	0.165533	-1.17277	5.71987	-0.216776	1.07749	0.996873	-0.186409	6.32764	-0.212361
PGRN	HB	677	6	0.948766	2	168	1	166	255	179	217	1.00895	-1.80621	-1.57602	3.62029	5.21672	1.01508	4.94547	5.3112	4.76064	7.53306	4.74055	3.71939
PARN	HB	675	6	2.24742	1	64	3	147	255	179	217	-0.907412	-3.29021	-2.87089	-0.547294	2.31004	1.67295	2.99269	1.48241	0.913833	5.98974	1.80144	0.0438704
LC	HB	631	6	0.0145469	2	95	3	148	255	195	149	2.85895	1.20214	2.57977	2.8614	4.02336	3.82465	4.35662	0.827424	1.83806	2.43798	-0.789545	3.47959
SPVI	HB	651	6	1.84597	1	36	3	137	255	165	210	1.3248	-3.155	-1.09039	-1.37079	-1.39413	1.70394	5.81559	0.174181	0.292802	3.67473	0.329079	2.0002
PHY	HB	680	6	0.270953	2	177	1	185	255	179	217	2.81397	0.703205	0.951266	-1.86596	2.55737	1.44927	10.1073	5.44232	4.10127	8.32389	3.25966	5.54953
NI	HB	633	6	0.105875	2	111	3	100	255	195	149	4.81048	0	0	5.15187	4.80787	1.23877	6.42479	-0.727844	2.59614	2.9971	4.5677	5.20107
LDT	HB	632	6	0.203969	1	22	3	38	255	195	149	-0.142185	-2.54309	0.492458	0.912353	0.276876	-2.62059	7.26952	0.827424	-1.13793	7.17035	0.950948	4.91346
V	HB	624	6	0.354563	2	169	3	133	255	186	134	-0.720254	-0.703205	1.04893	1.86596	-0.784506	5.09813	1.86182	-0.88018	1.30598	4.75104	-4.04921	6.33126
DTN	HB	616	6	0.103703	2	112	3	157	255	186	134	2.34792	0.703205	1.66252	2.8614	3.69464	3.41267	7.95111	-1.1772	-0.386617	5.729	-1.22406	5.27686
B	HB	615	6	0.0155312	2	179	3	155	255	186	134	2.67179	-0.498932	1.22717	3.63277	4.54951	-0.514136	5.71665	-2.05738	-1.90345	6.75373	2.85533	3.59232
SPVC	HB	650	6	1.68169	2	165	2	31	255	165	210	-0.907412	-0.885934	0.88949	0.346853	-0.98836	4.61128	-2.81864	-2.86801	-0.251542	-2.42378	5.11624	-2.76123
MARN	HB	671	6	0.532797	1	13	1	169	255	179	217	-1.37347	-1.34096	0.927803	-1.47094	4.09638	-1.38182	7.16728	4.90981	3.73617	5.17096	4.40423	4.40664
XII	HB	690	6	0.281359	1	23	2	27	255	179	217	2.13869	0.498932	-1.66252	-2.09003	-2.12563	0.514136	3.46981	-0.113532	2.99936	-1.19295	3.01594	-1.35904
SOC	HB	610	6	0.898953	1	53	3	35	255	174	111	-2.53508	-2.47507	-2.15964	-1.39632	-2.76123	-2.55049	7.90971	0.88018	0.733726	5.4633	-1.96985	7.41452
SLD	HB	637	6	0.0471094	1	24	2	19	255	195	149	0.32387	0.815136	-1.38661	-1.74318	1.34112	-1.63756	5.38658	1.61623	4.44895	1.3659	3.73698	1.76842
AMB	HB	658	6	0.0431719	2	155	3	81	255	179	217	0	0	0	3.40869	4.63952	1.9634	11.2763	2.59613	1.90345	10.4409	1.78425	4.32336
VII	HB	656	6	0.917312	2	162	3	34	255	179	217	2.34792	-0.498932	-0.435346	-0.547294	0.784506	3.7713	9.00252	1.54813	-0.0845336	6.27644	1.60976	2.4115
NTB	HB	648	6	0.154609	1	54	3	36	255	165	210	-2.308	-2.25337	-1.96619	-2.47179	-2.51389	-2.32203	7.37314	-1.1772	3.21621	7.72455	-1.22406	3.86556
SPVO	HB	652	6	0.999656	1	37	3	105	255	165	210	-1.62767	-1.58914	-1.38661	0.894148	1.34112	-1.63756	9.88621	0.630115	1.36608	4.98966	0	2.75145
RPO	HB	635	6	0.0963125	1	72	2	9	255	195	149	4.4141	2.40427	-3.36017e-16	-4.22424e-16	-4.29618e-16	-3.96831e-16	6.45371	3.81449	2.66897	3.22366	2.85533	6.49411
RO	HB	695	6	0.0383594	2	185	1	190	255	198	226	3.18282	3.85096e-16	3.36017e-16	4.22424e-16	3.46675	3.96831e-16	9.29934	8.56496	8.55636	5.61171	4.76526	4.26788
IO	HB	664	6	0.509672	1	19	1	191	255	179	217	0.32387	-0.885934	-0.773026	-0.971809	2.47839	-0.91293	8.30435	7.00945	6.02862	5.44045	9.78847	5.51761
SUT	HB	622	6	0.26	1	21	3	73	255	186	134	0.32387	-0.885934	-0.773026	1.11822	-0.98836	-0.91293	7.67337	2.25469	1.90345	7.47711	-0.789545	5.91994
RM	HB	693	6	0.119641	1	25	2	16	255	198	226	-0.907412	0.316203	0.275905	-0.971809	0.352761	-0.91293	5.7559	1.83681	3.53744	2.0076	1.68057	4.111
LIN	HB	667	6	0.0616875	1	17	3	125	255	179	217	0.957454	0.934791	-0.233274	-0.29326	1.04287	-0.275493	6.24219	0.250066	-0.969588	4.59936	1.60976	5.45204
x	HB	689	6	0.0569687	1	49	3	59	255	179	217	-0.720254	-0.703205	-0.613585	-0.771368	-0.784506	-0.724633	7.12483	0.538745	1.20094	6.1701	3.48902	3.7492
PSV	HB	607	6	1.09886	1	11	3	108	255	174	111	-0.273828	-0.267346	-0.233274	1.0254	1.04287	-0.275493	4.26511	-0.624533	1.12157	5.48503	1.37858	6.37843
y	HB	691	6	0.0234531	1	14	3	134	255	179	217	1.67771	-0.267346	-0.233274	-0.29326	-0.298255	-0.275493	5.00846	0.88018	-0.386617	5.77358	-0.434518	-0.402324
SLC	HB	636	6	0.0264687	1	8	2	12	255	195	149	-0.273828	-0.267346	-0.233274	-0.29326	1.04287	-0.275493	6.54755	2.10479	3.14826	0.32862	2.18858	3.448
ECU	HB	647	6	0.205156	1	27	3	141	255	165	210	0	0	0	0	2.12563	0	5.88228	-0.254936	-3.34026	0.743849	2.80289	1.73533
VI	HB	655	6	0.0304531	1	20	3	149	255	179	217	-0.273828	-0.267346	-0.233274	-0.29326	-0.298255	-0.275493	6.83472	1.29806	-3.84713e-16	-3.51418e-16	1.34974	3.7492
RPA	HB	694	6	0.06775	1	16	2	20	255	198	226	1.23128	3.85096e-16	3.36017e-16	4.22424e-16	4.29618e-16	3.96831e-16	-0.586105	1.46101	5.02526	1.69001	6.06674	2.32762
SG	HB	621	6	0.0173594	1	6	3	82	255	186	134	0	0	0	0	0	0	14.4625	6.01298	-0.386617	10.1533	3.0545	5.84634
ACVII	HB	657	6	0.00551562	1	5	3	161	255	179	217	0	0	0	0	0	0	10.6026	0.88018	-0.386617	9.53222	-0.434518	2.49946
ICB	HB	663	6	0.0540313	1	4	3	153	255	179	217	0	0	0	0	0	0	9.42252	-0.596371	-0.551751	5.37327	0.729624	1.40661
ISN	HB	666	6	0.0071875	1	1	2	30	255	179	217	0	0	0	0	0	0	3.45782	-0.596371	-0.551751	-0.503999	-0.620111	-0.574167
PPY	HB	683	6	0.0946562	1	2	3	151	255	179	217	0	0	0	0	0	0	-0.216776	2.37555	-0.20407	4.84333	-0.229354	-0.212361
