# Supplementary material for: Comparative brain-wide mapping of ketamine- and isoflurane-activated nuclei and functional networks in the mouse brain
Source: eLife. 2024 Mar 21;12:RP88420. doi: 10.7554/eLife.88420 (PMC10957177; doi:10.7554/eLife.88420)
Supplement: Figure 7—source data 1. [file elife-88420-fig7-data1.xlsx]

## Sheet: Home Cage
Row	ENT	RSP	VIS	PIR	ILA	TT	AUD	SS	ECT	TEa	ORB	CA	DG	AI	COA	ACA	MO	PL	MOB	BST	LSc	ACB	LSr	MS	CEA	OT	LH	RT	LAT	RE	PVT	LHA	TU	ZI	MBO	PVH	PVi	STN	VLPO	ARH	LPO	MEPO	MPO	MPN	SO	APN	PAG	DR	SNr
ENT	1	0.988432	0.981368	0.909054	0.799767	0.844096	0.615863	0.561121	0.841551	0.907461	0.743361	0.890095	0.892965	0.575823	0.51442	0.673331	0.587085	0.430191	0.333629	0.852487	0.784685	0.840271	0.69864	0.467725	0.479674	0.319578	0.888051	0.839512	0.86865	0.849805	0.522457	0.934501	0.822268	0.778312	0.129905	0.343741	0.339498	0.397785	-0.0249783	0.537557	0.591821	0.373145	0.00293979	-0.190142	-0.797444	0.83931	0.953492	0.639346	0.330791
RSP	0.988432	1	0.946387	0.886742	0.814873	0.857386	0.523502	0.440051	0.756871	0.844787	0.643942	0.884065	0.909363	0.473524	0.389629	0.634577	0.586504	0.457397	0.398957	0.804333	0.714505	0.778104	0.630348	0.526459	0.395654	0.397514	0.849678	0.757593	0.870794	0.808341	0.410679	0.87846	0.778208	0.696399	0.0169379	0.215137	0.245161	0.334013	-0.10009	0.548473	0.579029	0.399668	-0.0231781	-0.159304	-0.843129	0.776247	0.928278	0.610232	0.315965
VIS	0.981368	0.946387	1	0.913475	0.813417	0.821679	0.646883	0.634798	0.901971	0.935127	0.847735	0.823987	0.827449	0.706134	0.628734	0.63928	0.51689	0.305601	0.245919	0.884012	0.85263	0.862339	0.783466	0.402025	0.617594	0.30074	0.875802	0.872357	0.787124	0.840519	0.630144	0.979582	0.887013	0.813725	0.198833	0.472441	0.40146	0.39332	-0.031183	0.538531	0.628193	0.337776	0.0344721	-0.174621	-0.675368	0.92313	0.956031	0.691474	0.275808
PIR	0.909054	0.886742	0.913475	1	0.837195	0.922642	0.481161	0.533133	0.860386	0.862955	0.750608	0.712175	0.644947	0.685752	0.43943	0.746456	0.703933	0.35956	0.452321	0.800788	0.731347	0.717836	0.812326	0.201446	0.617509	0.482252	0.668119	0.736275	0.759881	0.722164	0.41227	0.853238	0.866455	0.857067	0.0296835	0.241747	0.476841	0.208913	0.130308	0.770443	0.547691	0.363914	0.215939	0.194462	-0.714213	0.775413	0.768758	0.35908	-0.0174964
ILA	0.799767	0.814873	0.813417	0.837195	1	0.929019	0.242942	0.219228	0.578231	0.585012	0.659298	0.530772	0.614186	0.509552	0.179134	0.451696	0.461421	0.163143	0.564372	0.790233	0.741727	0.607963	0.811938	0.528082	0.548531	0.719909	0.53698	0.447245	0.524812	0.615148	0.374148	0.778279	0.919686	0.484395	-0.138547	0.172569	0.296429	-0.20191	-0.359225	0.817211	0.810793	0.592854	0.313489	0.27499	-0.534772	0.776928	0.732877	0.522785	-0.0620855
TT	0.844096	0.857386	0.821679	0.922642	0.929019	1	0.381429	0.350688	0.639474	0.650839	0.639788	0.680747	0.660146	0.438233	0.149822	0.725285	0.753843	0.465391	0.724338	0.829982	0.732364	0.686222	0.815873	0.462327	0.407485	0.601232	0.595159	0.539733	0.728702	0.729374	0.342264	0.767522	0.874461	0.648434	-0.0285766	0.126946	0.480157	-0.103972	-0.0337796	0.898477	0.743874	0.660913	0.431657	0.308746	-0.743322	0.666487	0.714467	0.313785	0.0201935
AUD	0.615863	0.523502	0.646883	0.481161	0.242942	0.381429	1	0.944149	0.716621	0.70583	0.760667	0.773261	0.644723	0.42171	0.719514	0.740947	0.529202	0.556931	0.0838759	0.776985	0.787249	0.914459	0.582199	0.311377	0.200499	-0.480372	0.851609	0.882442	0.709667	0.885174	0.865955	0.736185	0.527323	0.738296	0.852762	0.813597	0.738394	0.579646	0.472696	0.146651	0.472075	0.359365	0.234625	-0.519432	-0.469546	0.579202	0.701934	0.465788	0.717467
SS	0.561121	0.440051	0.634798	0.533133	0.219228	0.350688	0.944149	1	0.818116	0.756816	0.833607	0.625579	0.455254	0.634722	0.840498	0.718247	0.485366	0.370535	-0.0388366	0.718516	0.76169	0.836482	0.651214	0.0263159	0.427784	-0.438842	0.732063	0.892463	0.586233	0.770649	0.863751	0.726028	0.556262	0.843008	0.823222	0.849219	0.790418	0.595047	0.576021	0.188439	0.365724	0.18553	0.239038	-0.359713	-0.320919	0.620115	0.609122	0.371221	0.471956
ECT	0.841551	0.756871	0.901971	0.860386	0.578231	0.639474	0.716621	0.818116	1	0.9773	0.890902	0.691791	0.594774	0.870162	0.831068	0.66934	0.48926	0.205127	0.0156965	0.767516	0.777285	0.797952	0.758472	0.0156999	0.740259	0.0741704	0.771985	0.937391	0.678964	0.735905	0.677911	0.903987	0.778021	0.955714	0.358561	0.598026	0.533558	0.57134	0.289827	0.421209	0.388907	0.0792985	0.0173278	-0.155333	-0.498608	0.861485	0.797447	0.514916	0.163161
TEa	0.907461	0.844787	0.935127	0.862955	0.585012	0.650839	0.70583	0.756816	0.9773	1	0.819831	0.790243	0.719963	0.782748	0.784131	0.657573	0.492712	0.281027	0.0262332	0.753901	0.737225	0.805628	0.668378	0.117992	0.647419	0.0894433	0.844815	0.952528	0.770869	0.76499	0.610418	0.911906	0.73514	0.924005	0.28542	0.510527	0.41238	0.643351	0.222952	0.363496	0.359199	0.0698952	-0.110181	-0.262044	-0.618754	0.847533	0.865452	0.575097	0.262161
ORB	0.743361	0.643942	0.847735	0.750608	0.659298	0.639788	0.760667	0.833607	0.890902	0.819831	1	0.581312	0.533798	0.837833	0.797185	0.597684	0.398182	0.120455	0.0977409	0.890162	0.947114	0.867424	0.915135	0.217198	0.739837	0.0532207	0.738319	0.843629	0.520157	0.783226	0.889512	0.924009	0.897623	0.807579	0.536064	0.809077	0.688179	0.297915	0.128643	0.489351	0.684463	0.342228	0.295594	-0.120613	-0.299286	0.917852	0.783182	0.622621	0.219524
CA	0.890095	0.884065	0.823987	0.712175	0.530772	0.680747	0.773261	0.625579	0.691791	0.790243	0.581312	1	0.948881	0.267426	0.424705	0.776128	0.689062	0.736597	0.372011	0.789929	0.691213	0.872995	0.495934	0.560668	0.092908	-0.03356	0.943197	0.833799	0.977536	0.922164	0.517014	0.794026	0.583447	0.704932	0.361656	0.353578	0.408581	0.521957	0.199751	0.33928	0.493442	0.445253	0.032051	-0.424144	-0.89547	0.594726	0.878141	0.514307	0.664328
DG	0.892965	0.909363	0.827449	0.644947	0.614186	0.660146	0.644723	0.455254	0.594774	0.719963	0.533798	0.948881	1	0.221797	0.360153	0.568398	0.491958	0.584107	0.320505	0.763132	0.677461	0.817176	0.444071	0.725156	0.103088	0.0956903	0.93418	0.7397	0.883814	0.861257	0.484132	0.79566	0.598929	0.529154	0.218887	0.30762	0.200303	0.431425	-0.114745	0.277853	0.567009	0.450964	-0.0897526	-0.486877	-0.828862	0.651287	0.928217	0.697593	0.668387
AI	0.575823	0.473524	0.706134	0.685752	0.509552	0.438233	0.42171	0.634722	0.870162	0.782748	0.837833	0.267426	0.221797	1	0.827257	0.313288	0.127937	-0.27669	-0.225857	0.546423	0.633574	0.511293	0.718785	-0.240416	0.966454	0.196997	0.440464	0.6914	0.240607	0.390228	0.598748	0.733552	0.718147	0.759318	0.199592	0.586209	0.385396	0.366982	0.0976279	0.348945	0.286088	-0.143895	-0.0211819	0.0465173	-0.0572816	0.834609	0.551161	0.47136	-0.207168
COA	0.51442	0.389629	0.628734	0.43943	0.179134	0.149822	0.719514	0.840498	0.831068	0.784131	0.797185	0.424705	0.360153	0.827257	1	0.315962	0.0393224	-0.102987	-0.471706	0.517572	0.623486	0.639516	0.501377	-0.136109	0.693992	-0.331471	0.64238	0.842773	0.333177	0.515331	0.786429	0.705974	0.491778	0.723885	0.577752	0.824933	0.400493	0.726775	0.259744	-0.0724718	0.165126	-0.226795	-0.199764	-0.478182	-0.061565	0.742996	0.607516	0.601126	0.286962
ACA	0.673331	0.634577	0.63928	0.746456	0.451696	0.725285	0.740947	0.718247	0.66934	0.657573	0.597684	0.776128	0.568398	0.313288	0.315962	1	0.956308	0.804306	0.599737	0.75232	0.653139	0.772909	0.660282	0.20908	0.127014	-0.0398874	0.649954	0.704862	0.852179	0.822643	0.469224	0.629911	0.583337	0.823246	0.472369	0.333555	0.803862	0.258351	0.619261	0.633626	0.462967	0.552807	0.512273	0.0575303	-0.766725	0.398972	0.55478	0.0180915	0.335935
MO	0.587085	0.586504	0.51689	0.703933	0.461421	0.753843	0.529202	0.485366	0.48926	0.492712	0.398182	0.689062	0.491958	0.127937	0.0393224	0.956308	1	0.84828	0.771625	0.633559	0.493488	0.607369	0.559231	0.227091	-0.0188463	0.126228	0.485434	0.497344	0.804966	0.695868	0.225175	0.470016	0.491973	0.678488	0.25749	0.0654921	0.696711	0.0588316	0.55718	0.722871	0.421448	0.615916	0.567463	0.246615	-0.807139	0.225418	0.41517	-0.161062	0.204547
PL	0.430191	0.457397	0.305601	0.35956	0.163143	0.465391	0.556931	0.370535	0.205127	0.281027	0.120455	0.736597	0.584107	-0.27669	-0.102987	0.804306	0.84828	1	0.665483	0.464709	0.308815	0.540916	0.195437	0.445169	-0.458776	-0.195499	0.521495	0.389159	0.802913	0.664157	0.153009	0.272297	0.163165	0.394366	0.362246	0.0156719	0.493728	0.181041	0.499611	0.33657	0.290366	0.600646	0.376051	-0.145213	-0.817066	-0.0261468	0.353067	-0.115991	0.595639
MOB	0.333629	0.398957	0.245919	0.452321	0.564372	0.724338	0.0838759	-0.0388366	0.0156965	0.0262332	0.0977409	0.372011	0.320505	-0.225857	-0.471706	0.599737	0.771625	0.665483	1	0.463631	0.315493	0.303204	0.433663	0.501564	-0.231744	0.465927	0.151263	-0.010466	0.474777	0.424695	-0.0491906	0.196273	0.410259	0.156979	-0.0842157	-0.243665	0.427773	-0.531253	0.0589959	0.81283	0.592422	0.858604	0.721046	0.510441	-0.605861	0.0199356	0.18682	-0.215587	0.0153741
BST	0.852487	0.804333	0.884012	0.800788	0.790233	0.829982	0.776985	0.718516	0.767516	0.753901	0.890162	0.789929	0.763132	0.546423	0.517572	0.75232	0.633559	0.464709	0.463631	1	0.978292	0.956529	0.901105	0.566206	0.437926	0.151698	0.843145	0.791806	0.745473	0.945195	0.796131	0.930389	0.919285	0.728537	0.478127	0.633494	0.695745	0.152041	0.0608402	0.641041	0.863564	0.675657	0.435266	-0.113635	-0.601968	0.828679	0.871787	0.597801	0.41294
LSc	0.784685	0.714505	0.85263	0.731347	0.741727	0.732364	0.787249	0.76169	0.777285	0.737225	0.947114	0.691213	0.677461	0.633574	0.623486	0.653139	0.493488	0.308815	0.315493	0.978292	1	0.939811	0.917565	0.501333	0.53502	0.0845557	0.809172	0.791809	0.62019	0.894776	0.887537	0.92999	0.921114	0.703992	0.550193	0.758883	0.702815	0.166013	0.0281522	0.558265	0.857014	0.597603	0.413507	-0.155303	-0.434709	0.874571	0.844179	0.661159	0.387626
ACB	0.840271	0.778104	0.862339	0.717836	0.607963	0.686222	0.914459	0.836482	0.797952	0.805628	0.867424	0.872995	0.817176	0.511293	0.639516	0.772909	0.607369	0.540916	0.303204	0.956529	0.939811	1	0.778271	0.525316	0.346955	-0.101635	0.937332	0.897951	0.810923	0.985056	0.851015	0.91831	0.792343	0.770098	0.629218	0.719939	0.686448	0.397989	0.199519	0.427536	0.725057	0.549634	0.289613	-0.356395	-0.625705	0.7847	0.893282	0.626045	0.607258
LSr	0.69864	0.630348	0.783466	0.812326	0.811938	0.815873	0.582199	0.651214	0.758472	0.668378	0.915135	0.495934	0.444071	0.718785	0.501377	0.660282	0.559231	0.195437	0.433663	0.901105	0.917565	0.778271	1	0.276518	0.669971	0.320078	0.572046	0.644138	0.488421	0.731725	0.72566	0.836629	0.960841	0.724656	0.361335	0.596862	0.749943	-0.0582081	0.0806488	0.78495	0.816633	0.580132	0.574427	0.234116	-0.350425	0.814002	0.666273	0.416903	0.0148628
MS	0.467725	0.526459	0.402025	0.201446	0.528082	0.462327	0.311377	0.0263159	0.0156999	0.117992	0.217198	0.560668	0.725156	-0.240416	-0.136109	0.20908	0.227091	0.445169	0.501564	0.566206	0.501333	0.525316	0.276518	1	-0.25133	0.163926	0.558849	0.192322	0.462182	0.592541	0.329902	0.424031	0.409344	-0.0703488	0.135311	0.159214	0.0747569	-0.173758	-0.483762	0.2418	0.742996	0.751273	0.19886	-0.320711	-0.483762	0.328235	0.58676	0.578964	0.624639
CEA	0.479674	0.395654	0.617594	0.617509	0.548531	0.407485	0.200499	0.427784	0.740259	0.647419	0.739837	0.092908	0.103088	0.966454	0.693992	0.127014	-0.0188463	-0.458776	-0.231744	0.437926	0.53502	0.346955	0.669971	-0.25133	1	0.372958	0.275921	0.507877	0.0655303	0.221891	0.466917	0.634518	0.692213	0.595111	0.00295382	0.455725	0.23193	0.183596	-0.101023	0.36902	0.279281	-0.173911	-0.043267	0.182241	0.0718715	0.79395	0.450145	0.453912	-0.387103
OT	0.319578	0.397514	0.30074	0.482252	0.719909	0.601232	-0.480372	-0.438842	0.0741704	0.0894433	0.0532207	-0.03356	0.0956903	0.196997	-0.331471	-0.0398874	0.126228	-0.195499	0.465927	0.151698	0.0845557	-0.101635	0.320078	0.163926	0.372958	1	-0.115292	-0.178986	0.0327479	-0.0676496	-0.323453	0.185655	0.448205	0.00326342	-0.756306	-0.469867	-0.232745	-0.529414	-0.550399	0.669058	0.32499	0.229407	0.0996345	0.660363	-0.219408	0.27632	0.158087	0.0647869	-0.609595
LH	0.888051	0.849678	0.875802	0.668119	0.53698	0.595159	0.851609	0.732063	0.771985	0.844815	0.738319	0.943197	0.93418	0.440464	0.64238	0.649954	0.485434	0.521495	0.151263	0.843145	0.809172	0.937332	0.572046	0.558849	0.275921	-0.115292	1	0.914245	0.862324	0.933814	0.725804	0.893342	0.663651	0.707807	0.488172	0.596453	0.415101	0.589452	0.0877581	0.225539	0.559734	0.365159	-0.0361323	-0.56223	-0.706177	0.762794	0.953883	0.733091	0.701001
RT	0.839512	0.757593	0.872357	0.736275	0.447245	0.539733	0.882442	0.892463	0.937391	0.952528	0.843629	0.833799	0.7397	0.6914	0.842773	0.704862	0.497344	0.389159	-0.010466	0.791806	0.791809	0.897951	0.644138	0.192322	0.507877	-0.178986	0.914245	1	0.786028	0.853838	0.764384	0.896187	0.671098	0.901865	0.550288	0.687269	0.542857	0.710179	0.335833	0.237735	0.394673	0.144212	-0.0326233	-0.441662	-0.578765	0.79531	0.859775	0.595499	0.492434
LAT	0.86865	0.870794	0.787124	0.759881	0.524812	0.728702	0.709667	0.586233	0.678964	0.770869	0.520157	0.977536	0.883814	0.240607	0.333177	0.852179	0.804966	0.802913	0.474777	0.745473	0.62019	0.810923	0.488421	0.462182	0.0655303	0.0327479	0.862324	0.786028	1	0.878595	0.398261	0.731821	0.554367	0.742245	0.283706	0.226945	0.440994	0.470827	0.309002	0.437471	0.429413	0.447773	0.0984506	-0.269953	-0.952375	0.508671	0.795706	0.342088	0.550029
RE	0.849805	0.808341	0.840519	0.722164	0.615148	0.729374	0.885174	0.770649	0.735905	0.76499	0.783226	0.922164	0.861257	0.390228	0.515331	0.822643	0.695868	0.664157	0.424695	0.945195	0.894776	0.985056	0.731725	0.592541	0.221891	-0.0676496	0.933814	0.853838	0.878595	1	0.760897	0.876316	0.754008	0.737583	0.575423	0.606719	0.667083	0.355202	0.212024	0.468823	0.72519	0.624395	0.319249	-0.327612	-0.731746	0.705419	0.87925	0.55703	0.639424
PVT	0.522457	0.410679	0.630144	0.41227	0.374148	0.342264	0.865955	0.863751	0.677911	0.610418	0.889512	0.517014	0.484132	0.598748	0.786429	0.469224	0.225175	0.153009	-0.0491906	0.796131	0.887537	0.851015	0.72566	0.329902	0.466917	-0.323453	0.725804	0.764384	0.398261	0.760897	1	0.771221	0.676342	0.590694	0.811269	0.971275	0.693345	0.341672	0.148364	0.174742	0.650826	0.363228	0.293914	-0.414675	-0.124998	0.747969	0.677724	0.657302	0.521708
LHA	0.934501	0.87846	0.979582	0.853238	0.778279	0.767522	0.736185	0.726028	0.903987	0.911906	0.924009	0.794026	0.79566	0.733552	0.705974	0.629911	0.470016	0.272297	0.196273	0.930389	0.92999	0.91831	0.836629	0.424031	0.634518	0.185655	0.893342	0.896187	0.731821	0.876316	0.771221	1	0.910761	0.80415	0.357485	0.632783	0.500825	0.383403	-0.0134533	0.498082	0.697897	0.380862	0.113173	-0.233423	-0.573081	0.954116	0.954957	0.741968	0.344606
TU	0.822268	0.778208	0.887013	0.866455	0.919686	0.874461	0.527323	0.556262	0.778021	0.73514	0.897623	0.583447	0.598929	0.718147	0.491778	0.583337	0.491973	0.163165	0.410259	0.919285	0.921114	0.792343	0.960841	0.409344	0.692213	0.448205	0.663651	0.671098	0.554367	0.754008	0.676342	0.910761	1	0.690854	0.20904	0.518379	0.563507	-0.00869484	-0.12224	0.75679	0.83991	0.551426	0.392025	0.141439	-0.447146	0.904727	0.799412	0.586614	0.0551181
ZI	0.778312	0.696399	0.813725	0.857067	0.484395	0.648434	0.738296	0.843008	0.955714	0.924005	0.807579	0.704932	0.529154	0.759318	0.723885	0.823246	0.678488	0.394366	0.156979	0.728537	0.703992	0.770098	0.724656	-0.0703488	0.595111	0.00326342	0.707807	0.901865	0.742245	0.737583	0.590694	0.80415	0.690854	1	0.405475	0.509588	0.65879	0.546576	0.526251	0.488003	0.314666	0.136305	0.158024	-0.0490202	-0.582105	0.696412	0.680628	0.272058	0.153947
MBO	0.129905	0.0169379	0.198833	0.0296835	-0.138547	-0.0285766	0.852762	0.823222	0.358561	0.28542	0.536064	0.361656	0.218887	0.199592	0.577752	0.472369	0.25749	0.362246	-0.0842157	0.478127	0.550193	0.629218	0.361335	0.135311	0.00295382	-0.756306	0.488172	0.550288	0.283706	0.575423	0.811269	0.357485	0.20904	0.405475	1	0.855537	0.745106	0.38078	0.534684	-0.10448	0.312583	0.278008	0.366946	-0.483298	-0.0192461	0.24478	0.283347	0.223153	0.65525
PVH	0.343741	0.215137	0.472441	0.241747	0.172569	0.126946	0.813597	0.849219	0.598026	0.510527	0.809077	0.353578	0.30762	0.586209	0.824933	0.333555	0.0654921	0.0156719	-0.243665	0.633494	0.758883	0.719939	0.596862	0.159214	0.455725	-0.469867	0.596453	0.687269	0.226945	0.606719	0.971275	0.632783	0.518379	0.509588	0.855537	1	0.64205	0.390849	0.206213	-0.00520688	0.482584	0.186043	0.217348	-0.459645	0.0704096	0.641388	0.523079	0.584128	0.478412
PVi	0.339498	0.245161	0.40146	0.476841	0.296429	0.480157	0.738394	0.790418	0.533558	0.41238	0.688179	0.408581	0.200303	0.385396	0.400493	0.803862	0.696711	0.493728	0.427773	0.695745	0.702815	0.686448	0.749943	0.0747569	0.23193	-0.232745	0.415101	0.542857	0.440994	0.667083	0.693345	0.500825	0.563507	0.65879	0.745106	0.64205	1	0.0279173	0.617508	0.549638	0.552082	0.572182	0.777197	0.139918	-0.26207	0.361114	0.315427	-0.020688	0.230144
STN	0.397785	0.334013	0.39332	0.208913	-0.20191	-0.103972	0.579646	0.595047	0.57134	0.643351	0.297915	0.521957	0.431425	0.366982	0.726775	0.258351	0.0588316	0.181041	-0.531253	0.152041	0.166013	0.397989	-0.0582081	-0.173758	0.183596	-0.529414	0.589452	0.710179	0.470827	0.355202	0.341672	0.383403	-0.00869484	0.546576	0.38078	0.390849	0.0279173	1	0.402597	-0.431081	-0.309869	-0.473545	-0.594619	-0.730446	-0.30474	0.313487	0.44664	0.361854	0.495632
VLPO	-0.0249783	-0.10009	-0.031183	0.130308	-0.359225	-0.0337796	0.472696	0.576021	0.289827	0.222952	0.128643	0.199751	-0.114745	0.0976279	0.259744	0.619261	0.55718	0.499611	0.0589959	0.0608402	0.0281522	0.199519	0.0806488	-0.483762	-0.101023	-0.550399	0.0877581	0.335833	0.309002	0.212024	0.148364	-0.0134533	-0.12224	0.526251	0.534684	0.206213	0.617508	0.402597	1	0.0444994	-0.27986	-0.0704872	0.287144	0.0234834	-0.2	-0.19528	-0.133614	-0.511187	0.129038
ARH	0.537557	0.548473	0.538531	0.770443	0.817211	0.898477	0.146651	0.188439	0.421209	0.363496	0.489351	0.33928	0.277853	0.348945	-0.0724718	0.633626	0.722871	0.33657	0.81283	0.641041	0.558265	0.427536	0.78495	0.2418	0.36902	0.669058	0.225539	0.237735	0.437471	0.468823	0.174742	0.498082	0.75679	0.488003	-0.10448	-0.00520688	0.549638	-0.431081	0.0444994	1	0.671777	0.678129	0.685932	0.667607	-0.489494	0.428804	0.361402	-0.0294327	-0.292873
LPO	0.591821	0.579029	0.628193	0.547691	0.810793	0.743874	0.472075	0.365724	0.388907	0.359199	0.684463	0.493442	0.567009	0.286088	0.165126	0.462967	0.421448	0.290366	0.592422	0.863564	0.857014	0.725057	0.816633	0.742996	0.279281	0.32499	0.559734	0.394673	0.429413	0.72519	0.650826	0.697897	0.83991	0.314666	0.312583	0.482584	0.552082	-0.309869	-0.27986	0.671777	1	0.860444	0.605023	0.0728523	-0.356382	0.656842	0.653058	0.543746	0.282654
MEPO	0.373145	0.399668	0.337776	0.363914	0.592854	0.660913	0.359365	0.18553	0.0792985	0.0698952	0.342228	0.445253	0.450964	-0.143895	-0.226795	0.552807	0.615916	0.600646	0.858604	0.675657	0.597603	0.549634	0.580132	0.751273	-0.173911	0.229407	0.365159	0.144212	0.447773	0.624395	0.363228	0.380862	0.551426	0.136305	0.278008	0.186043	0.572182	-0.473545	-0.0704872	0.678129	0.860444	1	0.782026	0.198984	-0.462398	0.2338	0.375729	0.138653	0.328398
MPO	0.00293979	-0.0231781	0.0344721	0.215939	0.313489	0.431657	0.234625	0.239038	0.0173278	-0.110181	0.295594	0.032051	-0.0897526	-0.0211819	-0.199764	0.512273	0.567463	0.376051	0.721046	0.435266	0.413507	0.289613	0.574427	0.19886	-0.043267	0.0996345	-0.0361323	-0.0326233	0.0984506	0.319249	0.293914	0.113173	0.392025	0.158024	0.366946	0.217348	0.777197	-0.594619	0.287144	0.685932	0.605023	0.782026	1	0.542621	-0.0741739	0.014143	-0.0524482	-0.297805	-0.0650167
MPN	-0.190142	-0.159304	-0.174621	0.194462	0.27499	0.308746	-0.519432	-0.359713	-0.155333	-0.262044	-0.120613	-0.424144	-0.486877	0.0465173	-0.478182	0.0575303	0.246615	-0.145213	0.510441	-0.113635	-0.155303	-0.356395	0.234116	-0.320711	0.182241	0.660363	-0.56223	-0.441662	-0.269953	-0.327612	-0.414675	-0.233423	0.141439	-0.0490202	-0.483298	-0.459645	0.139918	-0.730446	0.0234834	0.667607	0.0728523	0.198984	0.542621	1	0.114681	-0.185246	-0.408878	-0.592132	-0.834391
SO	-0.797444	-0.843129	-0.675368	-0.714213	-0.534772	-0.743322	-0.469546	-0.320919	-0.498608	-0.618754	-0.299286	-0.89547	-0.828862	-0.0572816	-0.061565	-0.766725	-0.807139	-0.817066	-0.605861	-0.601968	-0.434709	-0.625705	-0.350425	-0.483762	0.0718715	-0.219408	-0.706177	-0.578765	-0.952375	-0.731746	-0.124998	-0.573081	-0.447146	-0.582105	-0.0192461	0.0704096	-0.26207	-0.30474	-0.2	-0.489494	-0.356382	-0.462398	-0.0741739	0.114681	1	-0.345472	-0.673452	-0.198655	-0.418106
APN	0.83931	0.776247	0.92313	0.775413	0.776928	0.666487	0.579202	0.620115	0.861485	0.847533	0.917852	0.594726	0.651287	0.834609	0.742996	0.398972	0.225418	-0.0261468	0.0199356	0.828679	0.874571	0.7847	0.814002	0.328235	0.79395	0.27632	0.762794	0.79531	0.508671	0.705419	0.747969	0.954116	0.904727	0.696412	0.24478	0.641388	0.361114	0.313487	-0.19528	0.428804	0.656842	0.2338	0.014143	-0.185246	-0.345472	1	0.885167	0.812517	0.170648
PAG	0.953492	0.928278	0.956031	0.768758	0.732877	0.714467	0.701934	0.609122	0.797447	0.865452	0.783182	0.878141	0.928217	0.551161	0.607516	0.55478	0.41517	0.353067	0.18682	0.871787	0.844179	0.893282	0.666273	0.58676	0.450145	0.158087	0.953883	0.859775	0.795706	0.87925	0.677724	0.954957	0.799412	0.680628	0.283347	0.523079	0.315427	0.44664	-0.133614	0.361402	0.653058	0.375729	-0.0524482	-0.408878	-0.673452	0.885167	1	0.820001	0.509118
DR	0.639346	0.610232	0.691474	0.35908	0.522785	0.313785	0.465788	0.371221	0.514916	0.575097	0.622621	0.514307	0.697593	0.47136	0.601126	0.0180915	-0.161062	-0.115991	-0.215587	0.597801	0.661159	0.626045	0.416903	0.578964	0.453912	0.0647869	0.733091	0.595499	0.342088	0.55703	0.657302	0.741968	0.586614	0.272058	0.223153	0.584128	-0.020688	0.361854	-0.511187	-0.0294327	0.543746	0.138653	-0.297805	-0.592132	-0.198655	0.812517	0.820001	1	0.475499
SNr	0.330791	0.315965	0.275808	-0.0174964	-0.0620855	0.0201935	0.717467	0.471956	0.163161	0.262161	0.219524	0.664328	0.668387	-0.207168	0.286962	0.335935	0.204547	0.595639	0.0153741	0.41294	0.387626	0.607258	0.0148628	0.624639	-0.387103	-0.609595	0.701001	0.492434	0.550029	0.639424	0.521708	0.344606	0.0551181	0.153947	0.65525	0.478412	0.230144	0.495632	0.129038	-0.292873	0.282654	0.328398	-0.0650167	-0.834391	-0.418106	0.170648	0.509118	0.475499	1
VTA	0.488329	0.475352	0.396397	0.371862	0.0802104	0.376403	0.758643	0.603683	0.38245	0.448147	0.279597	0.809523	0.633814	-0.0966525	0.192418	0.829358	0.781066	0.946017	0.427287	0.522753	0.407901	0.667584	0.231276	0.356349	-0.326915	-0.410722	0.667471	0.598686	0.840577	0.750713	0.359266	0.39399	0.188188	0.543604	0.570003	0.261139	0.563424	0.45014	0.60958	0.179569	0.237374	0.449247	0.250534	-0.367773	-0.765796	0.107685	0.459516	0.0299028	0.724264
RR	0.222892	0.188697	0.256655	-0.0588273	-0.141046	-0.302471	0.194537	0.187163	0.294621	0.381864	0.156904	0.186043	0.308226	0.320695	0.607208	-0.333734	-0.522615	-0.355405	-0.788286	-0.0443139	0.0393448	0.127755	-0.214591	-0.0159806	0.285159	-0.285471	0.38514	0.393529	0.0440947	0.0430443	0.241352	0.263503	-0.0578961	0.0922096	0.065984	0.313223	-0.440323	0.744028	-0.26022	-0.63688	-0.258923	-0.601626	-0.852846	-0.777924	0.0803106	0.368667	0.381007	0.665766	0.338229
MRN	0.63809	0.649004	0.604569	0.636134	0.364806	0.392433	0.0698185	0.153542	0.623397	0.71237	0.254269	0.44541	0.439258	0.531184	0.391722	0.219929	0.19063	0.00242	-0.142048	0.176772	0.116217	0.204654	0.141708	-0.176306	0.503996	0.379226	0.402291	0.51029	0.485508	0.200044	-0.0820955	0.464499	0.299282	0.56561	-0.387581	-0.151129	-0.235774	0.567835	0.000394626	0.147772	-0.175499	-0.388924	-0.570178	-0.0733534	-0.511571	0.469791	0.497614	0.286225	-0.150155
EW	0.393061	0.400372	0.383229	0.724011	0.553104	0.702884	-0.0454724	0.107487	0.425449	0.367621	0.283662	0.174273	0.033362	0.401535	-0.0585437	0.559408	0.668563	0.218123	0.583482	0.313839	0.220942	0.145256	0.536652	-0.236054	0.415678	0.636501	0.00510712	0.171573	0.339215	0.182051	-0.129791	0.283372	0.49026	0.547441	-0.30728	-0.246934	0.374925	-0.228375	0.286404	0.847378	0.19445	0.235183	0.422222	0.768763	-0.425147	0.228564	0.121581	-0.327385	-0.564349
PPN	0.735645	0.69153	0.785061	0.936402	0.747553	0.800213	0.320009	0.482048	0.838231	0.785704	0.726894	0.444548	0.355581	0.81875	0.473363	0.60753	0.560614	0.0946585	0.29948	0.641404	0.614146	0.528177	0.79883	-0.100841	0.790115	0.526953	0.43438	0.619282	0.512845	0.495171	0.338439	0.731799	0.809828	0.831878	-0.0495404	0.221401	0.455275	0.137268	0.170144	0.755866	0.399089	0.16403	0.215701	0.38469	-0.459025	0.726985	0.569117	0.217251	-0.312408
PB	-0.633494	-0.645351	-0.605874	-0.641231	-0.768885	-0.854387	-0.492772	-0.360714	-0.37464	-0.371363	-0.553768	-0.635835	-0.618409	-0.12012	0.00972197	-0.718237	-0.745982	-0.630023	-0.845112	-0.845662	-0.759397	-0.723782	-0.755877	-0.704517	-0.0643941	-0.324154	-0.561115	-0.398174	-0.647614	-0.785338	-0.467528	-0.624281	-0.75338	-0.416648	-0.268256	-0.264059	-0.639586	0.285559	0.00908864	-0.800532	-0.90116	-0.946888	-0.702428	-0.187591	0.635144	-0.472878	-0.596952	-0.265435	-0.304315
TRN	-0.710667	-0.723567	-0.630579	-0.726012	-0.582458	-0.822003	-0.595309	-0.478145	-0.499905	-0.538555	-0.4561	-0.819603	-0.692255	-0.0959306	-0.0562421	-0.927801	-0.957988	-0.880892	-0.797083	-0.753657	-0.611406	-0.728697	-0.59365	-0.486016	0.0454278	-0.157055	-0.645801	-0.558678	-0.889715	-0.822121	-0.323107	-0.591312	-0.583246	-0.633668	-0.273207	-0.130174	-0.634494	-0.0692812	-0.359037	-0.702656	-0.583835	-0.732334	-0.51177	-0.0856759	0.888098	-0.347244	-0.59283	-0.0724976	-0.380999
CS	0.713083	0.64065	0.75025	0.592734	0.268317	0.288393	0.619286	0.68685	0.86581	0.908121	0.648074	0.632411	0.586716	0.732721	0.873784	0.37645	0.166268	0.0676488	-0.371402	0.475758	0.5006	0.6116	0.360584	-0.0630307	0.596876	-0.139706	0.744851	0.884103	0.576744	0.541849	0.526223	0.733842	0.447146	0.771992	0.276302	0.507007	0.153487	0.865292	0.2	-0.0444994	0.0376809	-0.297939	-0.457516	-0.512166	-0.4	0.720083	0.729256	0.602597	0.304563
NTS	0.70935	0.745	0.639501	0.359644	0.426128	0.374699	0.449148	0.223966	0.368076	0.530012	0.310315	0.774732	0.917855	0.064803	0.286538	0.209362	0.131376	0.358561	0.0572136	0.512186	0.45477	0.598138	0.147648	0.742578	-0.0085303	0.0317509	0.810128	0.554315	0.660596	0.631002	0.346266	0.608516	0.360462	0.23213	0.0874813	0.213434	-0.145552	0.459059	-0.362952	-0.0495155	0.389429	0.237002	-0.384528	-0.678218	-0.627986	0.528157	0.815331	0.791409	0.702614
SLD	0.669797	0.651363	0.677887	0.349272	0.352558	0.22033	0.483023	0.37854	0.546439	0.657577	0.486542	0.62282	0.764557	0.405282	0.628609	0.0589132	-0.118318	0.00484007	-0.32832	0.467562	0.494919	0.576946	0.207086	0.457229	0.340414	-0.058608	0.784416	0.669878	0.47398	0.530106	0.509322	0.681907	0.402355	0.34081	0.168916	0.450187	-0.1542	0.64242	-0.349215	-0.202018	0.269917	-0.0789164	-0.554107	-0.747277	-0.349215	0.703815	0.815046	0.922177	0.560619
PCG	0.647475	0.723351	0.499688	0.519497	0.327721	0.486752	0.175831	0.036025	0.326745	0.498258	-0.00170959	0.724692	0.713471	-0.0562132	-0.03587	0.444746	0.515242	0.601066	0.332639	0.253673	0.0846807	0.312103	-0.0144096	0.319611	-0.140361	0.252324	0.527314	0.397927	0.779966	0.420002	-0.193377	0.34553	0.152502	0.372296	-0.287062	-0.346446	-0.170874	0.418194	0.0486959	0.193948	-0.00488111	0.0890317	-0.339947	-0.203929	-0.891411	0.172716	0.516363	0.159102	0.299978
PRNr	0.590263	0.582081	0.544134	0.710322	0.281237	0.473762	0.219672	0.335383	0.664804	0.708694	0.27674	0.497633	0.343837	0.48209	0.337635	0.554926	0.54877	0.303085	0.0984928	0.23572	0.139558	0.272587	0.241197	-0.323255	0.385684	0.241428	0.361623	0.55119	0.612074	0.29618	-0.0684826	0.410953	0.284307	0.746838	-0.186881	-0.139331	0.122798	0.53036	0.438896	0.336143	-0.188597	-0.234755	-0.232663	0.120017	-0.626565	0.315447	0.372616	-0.0578986	-0.161122
LC	0.27145	0.334742	0.182682	0.0460531	-0.0494363	-0.103492	-0.168682	-0.244634	0.0808773	0.25715	-0.249319	0.25711	0.378224	-0.0332852	0.0808689	-0.260531	-0.25694	-0.0732379	-0.382652	-0.229292	-0.285309	-0.116274	-0.447125	0.0445985	-0.0274162	0.110867	0.229061	0.140269	0.222984	-0.0902532	-0.336857	0.0532674	-0.217365	-0.0271201	-0.472359	-0.354357	-0.725167	0.556989	-0.308112	-0.420359	-0.421307	-0.527065	-0.912051	-0.474183	-0.308112	0.0718169	0.263578	0.330435	0.149876
LDT	0.200122	0.288755	0.0321613	-0.0956982	-0.152948	-0.0270619	0.118489	-0.150424	-0.176597	0.020243	-0.373838	0.507064	0.548938	-0.575265	-0.259285	0.112524	0.176618	0.600539	0.141813	-0.0553838	-0.19219	0.0961072	-0.459456	0.4791	-0.668166	-0.208857	0.347473	0.0805501	0.492574	0.217077	-0.249447	-0.053689	-0.316965	-0.13223	-0.0758264	-0.326112	-0.346281	0.361659	-0.0295079	-0.312673	-0.155923	0.0780366	-0.403112	-0.558442	-0.593837	-0.239422	0.220113	0.10374	0.649738
[truncated: 14 more columns]

## Sheet: Isoflurane
Row	ECT	TEa	PL	ILA	PIR	ACA	CA	DG	MOB	VIS	COA	ORB	RSP	AI	MO	SS	AUD	TT	ENT	LSc	LSr	MS	ACB	BST	CEA	OT	RE	RT	PVT	LAT	LH	PVH	ZI	LHA	LPO	PVi	STN	MEPO	ARH	MBO	MPO	TU	VLPO	MPN	SO	PAG	PPN	APN	EW
ECT	1	0.997013	0.956904	0.955458	0.946687	0.525661	0.725	0.730348	0.822666	0.726574	0.851189	0.918718	0.846799	0.517995	0.535994	0.0754877	0.821359	0.819794	0.588829	0.654203	0.786738	0.701092	0.815077	0.689948	0.523365	0.77899	0.471794	0.194477	0.749118	-0.10461	-0.166312	0.134651	-0.162905	0.680973	0.526791	0.301527	0.301804	0.350941	0.581916	0.784167	0.728036	0.141617	0.456656	0.796781	0.430586	-0.442009	-0.185957	0.0137927	-0.214689
TEa	0.997013	1	0.955708	0.968055	0.948874	0.523688	0.735403	0.736541	0.829854	0.729195	0.879171	0.932544	0.844323	0.526682	0.546355	0.102504	0.831523	0.825658	0.579979	0.62836	0.761143	0.736774	0.838189	0.673929	0.530059	0.807472	0.500355	0.231921	0.728135	-0.113633	-0.124491	0.165005	-0.127882	0.699768	0.556064	0.315724	0.300441	0.343695	0.531783	0.768017	0.734186	0.180625	0.498417	0.767571	0.44232	-0.441171	-0.185943	0.00288434	-0.217187
PL	0.956904	0.955708	1	0.911566	0.929454	0.748259	0.747358	0.763515	0.749406	0.668071	0.825918	0.903791	0.902654	0.624763	0.707653	0.266611	0.786488	0.766643	0.614248	0.762691	0.773379	0.736449	0.845128	0.822009	0.542602	0.670977	0.637807	0.327717	0.809875	0.179624	-0.083955	0.218181	-0.0494302	0.641545	0.625612	0.3243	0.438305	0.473423	0.423275	0.682729	0.597703	-0.0638717	0.359476	0.775039	0.49515	-0.328014	-0.0089118	0.181517	-0.261305
ILA	0.955458	0.968055	0.911566	1	0.947647	0.489555	0.584596	0.596386	0.740187	0.580059	0.839031	0.916598	0.779343	0.399144	0.517482	-0.0127346	0.876639	0.865767	0.672171	0.599266	0.659048	0.822441	0.779399	0.537069	0.417826	0.915048	0.423523	0.14445	0.604689	-0.180745	0.017578	0.11629	-0.184731	0.603207	0.447516	0.159523	0.106863	0.312738	0.374446	0.672119	0.603334	0.207672	0.619594	0.708581	0.466863	-0.596927	-0.352174	-0.133425	-0.243863
PIR	0.946687	0.948874	0.929454	0.947647	1	0.585507	0.58092	0.545162	0.614866	0.510534	0.730878	0.800524	0.700229	0.320081	0.427633	-0.00163152	0.954629	0.948604	0.786273	0.556083	0.574531	0.644634	0.679153	0.574463	0.258376	0.801601	0.383638	0.0556163	0.561875	-0.061958	-0.247022	-0.0895269	-0.344821	0.457874	0.397707	0.0529653	0.158273	0.153464	0.419602	0.545835	0.553293	-0.0223799	0.343373	0.878822	0.682097	-0.595702	-0.317266	-0.191102	-0.497178
ACA	0.525661	0.523688	0.748259	0.489555	0.585507	1	0.492232	0.521775	0.272621	0.253045	0.428141	0.519141	0.684411	0.586994	0.80694	0.545726	0.463889	0.414068	0.520896	0.746587	0.455444	0.512832	0.563931	0.819837	0.326317	0.181151	0.731862	0.432748	0.643243	0.763592	0.0640609	0.239254	0.133505	0.259323	0.564252	0.184601	0.552052	0.54206	-0.0579949	0.184892	0.0547714	-0.577097	-0.0474986	0.513929	0.517059	-0.00698689	0.348529	0.448789	-0.340976
CA	0.725	0.735403	0.747358	0.584596	0.58092	0.492232	1	0.974106	0.864711	0.940217	0.870838	0.762863	0.78871	0.867131	0.622236	0.658191	0.384878	0.361782	-0.00892734	0.424722	0.693698	0.498897	0.900659	0.811606	0.806215	0.332316	0.811736	0.73007	0.780866	0.173395	-0.120099	0.562167	0.419984	0.893341	0.919364	0.822628	0.824873	0.414902	0.449248	0.705371	0.859645	0.249082	0.252081	0.415367	0.1939	0.264235	0.469105	0.478153	0.0326505
DG	0.730348	0.736541	0.763515	0.596386	0.545162	0.521775	0.974106	1	0.908793	0.948329	0.881381	0.822576	0.880047	0.93713	0.740225	0.647383	0.309314	0.284364	-0.0367448	0.569918	0.80805	0.58677	0.93636	0.865868	0.906768	0.334518	0.837686	0.751096	0.88001	0.212531	0.0322827	0.671778	0.490659	0.935237	0.918493	0.856371	0.819629	0.602511	0.45231	0.792385	0.817888	0.24796	0.345038	0.352828	0.0441885	0.275555	0.486243	0.594629	0.199387
MOB	0.822666	0.829854	0.749406	0.740187	0.614866	0.272621	0.864711	0.908793	1	0.95589	0.932622	0.910267	0.857669	0.7683	0.589043	0.314692	0.408608	0.402911	0.0366101	0.529198	0.85566	0.67994	0.9153	0.674185	0.870185	0.593003	0.607041	0.527565	0.810013	-0.174048	0.0761631	0.573731	0.311635	0.964575	0.737737	0.735908	0.521747	0.532275	0.584636	0.937205	0.905712	0.513392	0.610338	0.374424	-0.0514062	-0.0107112	0.135209	0.336672	0.289509
VIS	0.726574	0.729195	0.668071	0.580059	0.510534	0.253045	0.940217	0.948329	0.95589	1	0.866061	0.783705	0.776578	0.812107	0.519322	0.459195	0.294175	0.290476	-0.11684	0.409467	0.790128	0.482437	0.865117	0.7063	0.871664	0.383154	0.642856	0.610936	0.788939	-0.0797471	-0.0882175	0.575355	0.383468	0.955317	0.802181	0.84422	0.694015	0.442146	0.62431	0.871144	0.947285	0.457785	0.391889	0.346235	-0.0470022	0.209438	0.338007	0.431874	0.257445
COA	0.851189	0.879171	0.825918	0.839031	0.730878	0.428141	0.870838	0.881381	0.932622	0.866061	1	0.948745	0.849601	0.747596	0.656067	0.414088	0.581743	0.554356	0.198344	0.487966	0.71012	0.820304	0.974923	0.659204	0.7713	0.719803	0.730091	0.607932	0.715779	-0.0830516	0.160946	0.557963	0.320477	0.919932	0.817427	0.649915	0.497435	0.45946	0.33118	0.770857	0.827296	0.460768	0.66483	0.403832	0.201799	-0.106916	0.0950208	0.233447	0.0678844
ORB	0.918718	0.932544	0.903791	0.916598	0.800524	0.519141	0.762863	0.822576	0.910267	0.783705	0.948745	1	0.935247	0.70421	0.733891	0.256511	0.632516	0.61092	0.369892	0.704545	0.832191	0.88764	0.942785	0.712466	0.74289	0.77412	0.652698	0.451136	0.807927	-0.0443413	0.206395	0.481652	0.180022	0.841702	0.687861	0.504528	0.382459	0.597144	0.391029	0.833775	0.7129	0.314532	0.690818	0.505123	0.179407	-0.269319	-0.0314546	0.233036	0.0883685
RSP	0.846799	0.844323	0.902654	0.779343	0.700229	0.684411	0.78871	0.880047	0.857669	0.776578	0.849601	0.935247	1	0.839853	0.87583	0.412262	0.46877	0.443161	0.293348	0.864795	0.921698	0.790277	0.918337	0.895213	0.820682	0.524836	0.751746	0.53485	0.953661	0.248666	0.191246	0.560989	0.282724	0.807995	0.738684	0.584792	0.579145	0.778196	0.412187	0.825674	0.612702	0.0676991	0.482744	0.488607	0.0946288	-0.0547864	0.22194	0.510098	0.164109
AI	0.517995	0.526682	0.624763	0.399144	0.320081	0.586994	0.867131	0.93713	0.7683	0.812107	0.747596	0.70421	0.839853	1	0.862082	0.795693	0.0617476	0.0205606	-0.190808	0.613668	0.739758	0.568822	0.864521	0.871575	0.935927	0.125046	0.918373	0.873779	0.861158	0.447221	0.264624	0.837062	0.70553	0.855771	0.931112	0.890431	0.880489	0.77251	0.221963	0.655387	0.593266	0.129652	0.296811	0.108827	-0.12428	0.477239	0.683017	0.815097	0.362136
MO	0.535994	0.546355	0.707653	0.517482	0.427633	0.80694	0.622236	0.740225	0.589043	0.519322	0.656067	0.733891	0.87583	0.862082	1	0.642025	0.210056	0.155079	0.152272	0.833048	0.698923	0.763214	0.796539	0.848969	0.754086	0.268042	0.874658	0.70474	0.82374	0.589465	0.483179	0.71944	0.541646	0.633304	0.758477	0.559229	0.632458	0.89199	-0.0207376	0.510397	0.260711	-0.126136	0.385572	0.174339	0.0162108	0.177835	0.460253	0.71303	0.231815
SS	0.0754877	0.102504	0.266611	-0.0127346	-0.00163152	0.545726	0.658191	0.647383	0.314692	0.459195	0.414088	0.256511	0.412262	0.795693	0.642025	1	-0.151114	-0.212403	-0.357301	0.193292	0.19821	0.242445	0.549932	0.616106	0.593914	-0.239619	0.889648	0.940524	0.435423	0.682189	0.225222	0.72774	0.809083	0.508689	0.859591	0.754125	0.893385	0.439759	-0.236146	0.0877041	0.257078	-0.0658105	-0.0607651	-0.161675	0.0306959	0.733888	0.890278	0.761704	0.126047
AUD	0.821359	0.831523	0.786488	0.876639	0.954629	0.463889	0.384878	0.309314	0.408608	0.294175	0.581743	0.632516	0.46877	0.0617476	0.210056	-0.151114	1	0.996612	0.863846	0.340954	0.315541	0.5413	0.489837	0.331822	-0.00891115	0.818641	0.200931	-0.115893	0.290988	-0.169916	-0.297035	-0.298496	-0.503241	0.245044	0.210355	-0.178031	-0.061474	-0.10134	0.272438	0.31777	0.407631	-0.0319958	0.293373	0.848452	0.808381	-0.732906	-0.495875	-0.447791	-0.671899
TT	0.819794	0.825658	0.766643	0.865767	0.948604	0.414068	0.361782	0.284364	0.402911	0.290476	0.554356	0.61092	0.443161	0.0205606	0.155079	-0.212403	0.996612	1	0.864319	0.322837	0.318885	0.49712	0.453698	0.303539	-0.0332183	0.812886	0.138074	-0.176364	0.277202	-0.221306	-0.348137	-0.347703	-0.556469	0.225361	0.159981	-0.203632	-0.0958278	-0.135937	0.329892	0.332812	0.4188	-0.0227743	0.273451	0.86867	0.792762	-0.756653	-0.534516	-0.483696	-0.670198
ENT	0.588829	0.579979	0.614248	0.672171	0.786273	0.520896	-0.00892734	-0.0367448	0.0366101	-0.11684	0.198344	0.369892	0.293348	-0.190808	0.152272	-0.357301	0.863846	0.864319	1	0.434045	0.173799	0.379223	0.154939	0.211128	-0.297998	0.613287	-0.0346712	-0.407692	0.153161	0.0205702	-0.242732	-0.521174	-0.696709	-0.160422	-0.141316	-0.543652	-0.297765	-0.0709082	0.111956	0.0590366	-0.0510097	-0.414215	0.0801548	0.799847	0.772511	-0.83028	-0.592604	-0.472832	-0.714622
LSc	0.654203	0.62836	0.762691	0.599266	0.556083	0.746587	0.424722	0.569918	0.529198	0.409467	0.487966	0.704545	0.864795	0.613668	0.833048	0.193292	0.340954	0.322837	0.434045	1	0.840991	0.631937	0.606772	0.813149	0.56831	0.327441	0.51654	0.235031	0.868237	0.4285	0.218505	0.342008	0.0758772	0.434782	0.394852	0.2429	0.362979	0.838416	0.321867	0.627354	0.194316	-0.312354	0.271192	0.476608	0.0397947	-0.155396	0.12649	0.506239	0.143755
LSr	0.786738	0.761143	0.773379	0.659048	0.574531	0.455444	0.693698	0.80805	0.85566	0.790128	0.71012	0.832191	0.921698	0.739758	0.698923	0.19821	0.315541	0.318885	0.173799	0.840991	1	0.586735	0.767207	0.814291	0.812037	0.406991	0.510386	0.3342	0.959091	0.0798409	0.0484446	0.460511	0.163796	0.763652	0.54627	0.563332	0.494181	0.750899	0.676082	0.940417	0.648279	0.11464	0.399291	0.479064	-0.131192	-0.0392625	0.159048	0.498535	0.331391
MS	0.701092	0.736774	0.736449	0.822441	0.644634	0.512832	0.498897	0.58677	0.67994	0.482437	0.820304	0.88764	0.790277	0.568822	0.763214	0.242445	0.5413	0.49712	0.379223	0.631937	0.586735	1	0.823558	0.502581	0.591857	0.790451	0.631151	0.456254	0.57975	0.0211213	0.567699	0.537852	0.277826	0.659549	0.581181	0.324415	0.168502	0.621783	-0.0421788	0.562257	0.387933	0.300649	0.83207	0.234233	0.142352	-0.331032	-0.112865	0.170331	0.122739
ACB	0.815077	0.838189	0.845128	0.779399	0.679153	0.563931	0.900659	0.93636	0.9153	0.865117	0.974923	0.942785	0.918337	0.864521	0.796539	0.549932	0.489837	0.453698	0.154939	0.606772	0.767207	0.823558	1	0.786052	0.846605	0.59685	0.843047	0.71014	0.815909	0.121793	0.223047	0.659566	0.432876	0.925308	0.889738	0.718519	0.629003	0.610442	0.286639	0.762776	0.757628	0.324266	0.589081	0.366771	0.152441	0.0269788	0.263574	0.425133	0.127784
BST	0.689948	0.673929	0.822009	0.537069	0.574463	0.819837	0.811606	0.865868	0.674185	0.7063	0.659204	0.712466	0.895213	0.871575	0.848969	0.616106	0.331822	0.303539	0.211128	0.813149	0.814291	0.502581	0.786052	1	0.733511	0.169012	0.809119	0.594706	0.941499	0.564529	-0.0374318	0.487995	0.313691	0.659414	0.769826	0.610412	0.808797	0.7063	0.391618	0.635651	0.499784	-0.250188	0.0620813	0.513478	0.189495	0.215751	0.518636	0.678756	0.0205227
CEA	0.523365	0.530059	0.542602	0.417826	0.258376	0.326317	0.806215	0.906768	0.870185	0.871664	0.7713	0.74289	0.820682	0.935927	0.754086	0.593914	-0.00891115	-0.0332183	-0.297998	0.56831	0.812037	0.591857	0.846605	0.733511	1	0.223852	0.755989	0.769363	0.840323	0.154537	0.336995	0.866627	0.684115	0.934108	0.82474	0.911612	0.722034	0.782943	0.358323	0.813584	0.691487	0.394095	0.494959	0.0156598	-0.357197	0.397648	0.521351	0.73375	0.58656
OT	0.77899	0.807472	0.670977	0.915048	0.801601	0.181151	0.332316	0.334518	0.593003	0.383154	0.719803	0.77412	0.524836	0.125046	0.268042	-0.239619	0.818641	0.812886	0.613287	0.327441	0.406991	0.790451	0.59685	0.169012	0.223852	1	0.18108	-0.0182444	0.287404	-0.46901	0.149566	0.0229037	-0.249542	0.463881	0.227433	-0.0212317	-0.220267	0.105651	0.202086	0.51382	0.488309	0.433241	0.778037	0.499892	0.382655	-0.742718	-0.60484	-0.408711	-0.201003
RE	0.471794	0.500355	0.637807	0.423523	0.383638	0.731862	0.811736	0.837686	0.607041	0.642856	0.730091	0.652698	0.751746	0.918373	0.874658	0.889648	0.200931	0.138074	-0.0346712	0.51654	0.510386	0.631151	0.843047	0.809119	0.755989	0.18108	1	0.919056	0.695759	0.573901	0.316523	0.764619	0.688905	0.723338	0.958955	0.747593	0.83462	0.638972	-0.0815846	0.394608	0.439791	0.0138117	0.267027	0.116013	0.154262	0.40107	0.654003	0.689538	0.0926452
RT	0.194477	0.231921	0.327717	0.14445	0.0556163	0.432748	0.73007	0.751096	0.527565	0.610936	0.607932	0.451136	0.53485	0.873779	0.70474	0.940524	-0.115893	-0.176364	-0.407692	0.235031	0.3342	0.456254	0.71014	0.594706	0.769363	-0.0182444	0.919056	1	0.50854	0.46303	0.409065	0.889726	0.896947	0.717155	0.929147	0.86933	0.830474	0.549646	-0.179485	0.296013	0.422944	0.231994	0.262303	-0.227398	-0.118709	0.648809	0.77819	0.740012	0.324704
PVT	0.749118	0.728135	0.809875	0.604689	0.561875	0.643243	0.780866	0.88001	0.810013	0.788939	0.715779	0.807927	0.953661	0.861158	0.82374	0.435423	0.290988	0.277202	0.153161	0.868237	0.959091	0.57975	0.815909	0.941499	0.840323	0.287404	0.695759	0.50854	1	0.331993	0.0556894	0.542897	0.295494	0.762929	0.694581	0.642687	0.684481	0.798177	0.546913	0.838422	0.596999	-0.0390292	0.270974	0.466818	-0.0321009	0.122689	0.373761	0.649501	0.248993
LAT	-0.10461	-0.113633	0.179624	-0.180745	-0.061958	0.763592	0.173395	0.212531	-0.174048	-0.0797471	-0.0830516	-0.0443413	0.248666	0.447221	0.589465	0.682189	-0.169916	-0.221306	0.0205702	0.4285	0.0798409	0.0211213	0.121793	0.564529	0.154537	-0.46901	0.573901	0.46303	0.331993	1	0.132847	0.29021	0.383815	-0.0717987	0.373147	0.181814	0.596866	0.459263	-0.341053	-0.228768	-0.340216	-0.741161	-0.447816	0.00049343	0.160245	0.492993	0.709978	0.682681	-0.108098
LH	-0.166312	-0.124491	-0.083955	0.017578	-0.247022	0.0640609	-0.120099	0.0322827	0.0761631	-0.0882175	0.160946	0.206395	0.191246	0.264624	0.483179	0.225222	-0.297035	-0.348137	-0.242732	0.218505	0.0484446	0.567699	0.223047	-0.0374318	0.336995	0.149566	0.316523	0.409065	0.0556894	0.132847	1	0.666991	0.616883	0.201462	0.196502	0.188922	-0.0722459	0.587505	-0.594079	0.0155605	-0.251114	0.286046	0.649162	-0.620173	-0.474464	0.113173	0.104453	0.338196	0.594029
PVH	0.134651	0.165005	0.218181	0.11629	-0.0895269	0.239254	0.562167	0.671778	0.573731	0.575355	0.557963	0.481652	0.560989	0.837062	0.71944	0.72774	-0.298496	-0.347703	-0.521174	0.342008	0.460511	0.537852	0.659566	0.487995	0.866627	0.0229037	0.764619	0.889726	0.542897	0.29021	0.666991	1	0.936998	0.743152	0.770578	0.852661	0.636628	0.753331	-0.127188	0.44828	0.359416	0.397298	0.497585	-0.415549	-0.48965	0.585594	0.64472	0.785285	0.690479
ZI	-0.162905	-0.127882	-0.0494302	-0.184731	-0.344821	0.133505	0.419984	0.490659	0.311635	0.383468	0.320477	0.180022	0.282724	0.70553	0.541646	0.809083	-0.503241	-0.556469	-0.696709	0.0758772	0.163796	0.277826	0.432876	0.313691	0.684115	-0.249542	0.688905	0.896947	0.295494	0.383815	0.616883	0.936998	1	0.540756	0.687956	0.797033	0.640115	0.560595	-0.324863	0.150448	0.178667	0.314159	0.263469	-0.610447	-0.496788	0.779917	0.779615	0.778091	0.633058
LHA	0.680973	0.699768	0.641545	0.603207	0.457874	0.259323	0.893341	0.935237	0.964575	0.955317	0.919932	0.841702	0.807995	0.855771	0.633304	0.508689	0.245044	0.225361	-0.160422	0.434782	0.763652	0.659549	0.925308	0.659414	0.934108	0.463881	0.723338	0.717155	0.762929	-0.0717987	0.201462	0.743152	0.540756	1	0.850116	0.869293	0.638536	0.565783	0.420399	0.846418	0.871973	0.561636	0.599808	0.17134	-0.141632	0.203852	0.327942	0.473487	0.386925
LPO	0.526791	0.556064	0.625612	0.447516	0.397707	0.564252	0.919364	0.918493	0.737737	0.802181	0.817427	0.687861	0.738684	0.931112	0.758477	0.859591	0.210355	0.159981	-0.141316	0.394852	0.54627	0.581181	0.889738	0.769826	0.82474	0.227433	0.958955	0.929147	0.694581	0.373147	0.196502	0.770578	0.687956	0.850116	1	0.863969	0.863507	0.535031	0.0875231	0.515135	0.653515	0.222709	0.310962	0.132089	0.106696	0.427746	0.632801	0.628934	0.138438
PVi	0.301527	0.315724	0.3243	0.159523	0.0529653	0.184601	0.822628	0.856371	0.735908	0.84422	0.649915	0.504528	0.584792	0.890431	0.559229	0.754125	-0.178031	-0.203632	-0.543652	0.2429	0.563332	0.324415	0.718519	0.610412	0.911612	-0.0212317	0.747593	0.86933	0.642687	0.181814	0.188922	0.852661	0.797033	0.869293	0.863969	1	0.841516	0.541906	0.268928	0.608601	0.699086	0.429401	0.269931	-0.137559	-0.343348	0.660474	0.71895	0.739948	0.524568
STN	0.301804	0.300441	0.438305	0.106863	0.158273	0.552052	0.824873	0.819629	0.521747	0.694015	0.497435	0.382459	0.579145	0.880489	0.632458	0.893385	-0.061474	-0.0958278	-0.297765	0.362979	0.494181	0.168502	0.629003	0.808797	0.722034	-0.220267	0.83462	0.830474	0.684481	0.596866	-0.0722459	0.636628	0.640115	0.638536	0.863507	0.841516	1	0.489039	0.213728	0.389411	0.502585	-0.0923613	-0.15261	0.119676	0.00924098	0.696011	0.873579	0.806735	0.144552
MEPO	0.350941	0.343695	0.473423	0.312738	0.153464	0.54206	0.414902	0.602511	0.532275	0.442146	0.45946	0.597144	0.778196	0.77251	0.89199	0.439759	-0.10134	-0.135937	-0.0709082	0.838416	0.750899	0.621783	0.610442	0.7063	0.782943	0.105651	0.638972	0.549646	0.798177	0.459263	0.587505	0.753331	0.560595	0.565783	0.535031	0.541906	0.489039	1	0.0872853	0.583976	0.160509	-0.0434601	0.408407	-0.0422434	-0.392576	0.248111	0.425889	0.792565	0.586216
ARH	0.581916	0.531783	0.423275	0.374446	0.419602	-0.0579949	0.449248	0.45231	0.584636	0.62431	0.33118	0.391029	0.412187	0.221963	-0.0207376	-0.236146	0.272438	0.329892	0.111956	0.321867	0.676082	-0.0421788	0.286639	0.391618	0.358323	0.202086	-0.0815846	-0.179485	0.546913	-0.341053	-0.594079	-0.127188	-0.324863	0.420399	0.0875231	0.268928	0.213728	0.0872853	1	0.751379	0.681368	0.15003	-0.0203114	0.602356	-0.050603	-0.137375	-0.105425	0.0304758	0.0762073
MBO	0.784167	0.768017	0.682729	0.672119	0.545835	0.184892	0.705371	0.792385	0.937205	0.871144	0.770857	0.833775	0.825674	0.655387	0.510397	0.0877041	0.31777	0.332812	0.0590366	0.627354	0.940417	0.562257	0.762776	0.635651	0.813584	0.51382	0.394608	0.296013	0.838422	-0.228768	0.0155605	0.44828	0.150448	0.846418	0.515135	0.608601	0.389411	0.583976	0.751379	1	0.812174	0.419617	0.538105	0.4084	-0.204204	-0.0845303	0.0306911	0.329989	0.394887
MPO	0.728036	0.734186	0.597703	0.603334	0.553293	0.0547714	0.859645	0.817888	0.905712	0.947285	0.827296	0.7129	0.612702	0.593266	0.260711	0.257078	0.407631	0.4188	-0.0510097	0.194316	0.648279	0.387933	0.757628	0.499784	0.691487	0.488309	0.439791	0.422944	0.596999	-0.340216	-0.251114	0.359416	0.178667	0.871973	0.653515	0.699086	0.502585	0.160509	0.681368	0.812174	1	0.582023	0.397097	0.412265	0.06149	0.0371709	0.111645	0.137121	0.11102
TU	0.141617	0.180625	-0.0638717	0.207672	-0.0223799	-0.577097	0.249082	0.24796	0.513392	0.457785	0.460768	0.314532	0.0676991	0.129652	-0.126136	-0.0658105	-0.0319958	-0.0227743	-0.414215	-0.312354	0.11464	0.300649	0.324266	-0.250188	0.394095	0.433241	0.0138117	0.231994	-0.0390292	-0.741161	0.286046	0.397298	0.314159	0.561636	0.222709	0.429401	-0.0923613	-0.0434601	0.15003	0.419617	0.582023	1	0.714883	-0.316168	-0.396617	-0.0110652	-0.184691	-0.155045	0.479789
VLPO	0.456656	0.498417	0.359476	0.619594	0.343373	-0.0474986	0.252081	0.345038	0.610338	0.391889	0.66483	0.690818	0.482744	0.296811	0.385572	-0.0607651	0.293373	0.273451	0.0801548	0.271192	0.399291	0.83207	0.589081	0.0620813	0.494959	0.778037	0.267027	0.262303	0.270974	-0.447816	0.649162	0.497585	0.263469	0.599808	0.310962	0.269931	-0.15261	0.408407	-0.0203114	0.538105	0.397097	0.714883	1	-0.0882429	-0.20791	-0.355724	-0.333886	-0.0560308	0.40241
MPN	0.796781	0.767571	0.775039	0.708581	0.878822	0.513929	0.415367	0.352828	0.374424	0.346235	0.403832	0.505123	0.488607	0.108827	0.174339	-0.161675	0.848452	0.86867	0.799847	0.476608	0.479064	0.234233	0.366771	0.513478	0.0156598	0.499892	0.116013	-0.227398	0.466818	0.00049343	-0.620173	-0.415549	-0.610447	0.17134	0.132089	-0.137559	0.119676	-0.0422434	0.602356	0.4084	0.412265	-0.316168	-0.0882429	1	0.716243	-0.551641	-0.305361	-0.244112	-0.638704
SO	0.430586	0.44232	0.49515	0.466863	0.682097	0.517059	0.1939	0.0441885	-0.0514062	-0.0470022	0.201799	0.179407	0.0946288	-0.12428	0.0162108	0.0306959	0.808381	0.792762	0.772511	0.0397947	-0.131192	0.142352	0.152441	0.189495	-0.357197	0.382655	0.154262	-0.118709	-0.0321009	0.160245	-0.474464	-0.48965	-0.496788	-0.141632	0.106696	-0.343348	0.00924098	-0.392576	-0.050603	-0.204204	0.06149	-0.396617	-0.20791	0.716243	1	-0.47646	-0.254677	-0.443542	-0.958343
PAG	-0.442009	-0.441171	-0.328014	-0.596927	-0.595702	-0.00698689	0.264235	0.275555	-0.0107112	0.209438	-0.106916	-0.269319	-0.0547864	0.477239	0.177835	0.733888	-0.732906	-0.756653	-0.83028	-0.155396	-0.0392625	-0.331032	0.0269788	0.215751	0.397648	-0.742718	0.40107	0.648809	0.122689	0.492993	0.113173	0.585594	0.779917	0.203852	0.427746	0.660474	0.696011	0.248111	-0.137375	-0.0845303	0.0371709	-0.0110652	-0.355724	-0.551641	-0.47646	1	0.933022	0.766819	0.468608
PPN	-0.185957	-0.185943	-0.0089118	-0.352174	-0.317266	0.348529	0.469105	0.486243	0.135209	0.338007	0.0950208	-0.0314546	0.22194	0.683017	0.460253	0.890278	-0.495875	-0.534516	-0.592604	0.12649	0.159048	-0.112865	0.263574	0.518636	0.521351	-0.60484	0.654003	0.77819	0.373761	0.709978	0.104453	0.64472	0.779615	0.327942	0.632801	0.71895	0.873579	0.425889	-0.105425	0.0306911	0.111645	-0.184691	-0.333886	-0.305361	-0.254677	0.933022	1	0.879021	0.317737
APN	0.0137927	0.00288434	0.181517	-0.133425	-0.191102	0.448789	0.478153	0.594629	0.336672	0.431874	0.233447	0.233036	0.510098	0.815097	0.71303	0.761704	-0.447791	-0.483696	-0.472832	0.506239	0.498535	0.170331	0.425133	0.678756	0.73375	-0.408711	0.689538	0.740012	0.649501	0.682681	0.338196	0.785285	0.778091	0.473487	0.628934	0.739948	0.806735	0.792565	0.0304758	0.329989	0.137121	-0.155045	-0.0560308	-0.244112	-0.443542	0.766819	0.879021	1	0.563377
EW	-0.214689	-0.217187	-0.261305	-0.243863	-0.497178	-0.340976	0.0326505	0.199387	0.289509	0.257445	0.0678844	0.0883685	0.164109	0.362136	0.231815	0.126047	-0.671899	-0.670198	-0.714622	0.143755	0.331391	0.122739	0.127784	0.0205227	0.58656	-0.201003	0.0926452	0.324704	0.248993	-0.108098	0.594029	0.690479	0.633058	0.386925	0.138438	0.524568	0.144552	0.586216	0.0762073	0.394887	0.11102	0.479789	0.40241	-0.638704	-0.958343	0.468608	0.317737	0.563377	1
RR	0.317496	0.383702	0.380646	0.407847	0.358915	0.327493	0.580629	0.49478	0.397112	0.407173	0.661515	0.458016	0.316402	0.463791	0.392974	0.63289	0.373621	0.313777	0.015976	-0.0779134	-0.0104397	0.557652	0.633023	0.250519	0.345675	0.420942	0.703753	0.713552	0.118419	0.100125	0.269413	0.474514	0.484348	0.526378	0.737842	0.456273	0.405201	0.0386534	-0.356897	0.0554876	0.410715	0.365016	0.416464	-0.00499307	0.395245	0.111721	0.239929	0.0725118	-0.201808
MRN	0.463268	0.502629	0.518623	0.47453	0.602963	0.453371	0.581376	0.418149	0.278613	0.346834	0.538001	0.363747	0.248344	0.267615	0.190971	0.458823	0.660992	0.624839	0.360279	-0.0764157	-0.0357431	0.30022	0.489824	0.319975	0.0618396	0.389911	0.527252	0.40117	0.105132	0.13588	-0.28654	-0.000117115	0.0181655	0.307192	0.570014	0.196446	0.382842	-0.259144	-0.0848603	-0.0148567	0.425021	0.0174382	0.0182164	0.462538	0.805659	-0.0897042	0.102468	-0.161215	-0.675519
SNr	0.308553	0.25955	0.301497	0.0419327	0.279233	0.224997	0.452072	0.358347	0.200338	0.40034	0.0628189	0.0286779	0.173772	0.204475	-0.0645664	0.153262	0.184016	0.218452	0.088796	0.122538	0.309176	-0.399286	0.0907997	0.467327	0.0941805	-0.252698	0.0788747	-0.0271315	0.369549	0.188241	-0.867573	-0.269124	-0.263606	0.120671	0.177627	0.21465	0.51095	-0.150055	0.701761	0.257872	0.418283	-0.349173	-0.624819	0.613693	0.30989	0.20579	0.303427	0.157956	-0.343745
VTA	0.409183	0.39552	0.515545	0.181732	0.331911	0.56561	0.817187	0.753664	0.465416	0.662836	0.446514	0.337263	0.510729	0.714572	0.452821	0.733462	0.157607	0.140364	-0.0728124	0.306406	0.451027	0.0264315	0.541871	0.790754	0.523268	-0.171044	0.68636	0.607375	0.629202	0.52022	-0.42112	0.31615	0.319069	0.513935	0.739625	0.66044	0.926562	0.243113	0.386979	0.351958	0.548248	-0.225101	-0.341082	0.410851	0.279546	0.512361	0.712764	0.577008	-0.16493
DR	-0.729525	-0.753108	-0.757335	-0.875676	-0.757143	-0.544553	-0.297077	-0.373251	-0.506335	-0.268576	-0.666135	-0.807351	-0.695434	-0.313456	-0.628871	0.027355	-0.712768	-0.68093	-0.674158	-0.661217	-0.508426	-0.92969	-0.648967	-0.407253	-0.317671	-0.858279	-0.409119	-0.137712	-0.4728	0.0190502	-0.415144	-0.20822	0.0702605	-0.408316	-0.319576	0.0124803	0.0736225	-0.474633	0.0156736	-0.448803	-0.220111	-0.0936875	-0.723481	-0.435957	-0.338525	0.619001	0.378517	0.0757614	0.120031
LC	0.68862	0.695928	0.737452	0.592569	0.477536	0.5326	0.880195	0.962886	0.900957	0.88503	0.862875	0.856652	0.930189	0.960932	0.848963	0.613588	0.220919	0.190138	-0.0574173	0.687434	0.861073	0.700433	0.939639	0.85596	0.963815	0.354371	0.842462	0.758207	0.915626	0.24204	0.263555	0.782473	0.56972	0.932982	0.880868	0.838548	0.746474	0.781474	0.361628	0.819138	0.706537	0.258949	0.480888	0.230637	-0.112935	0.255473	0.46281	0.67511	0.371274
PCG	0.578917	0.568874	0.525122	0.392944	0.312086	0.170261	0.86145	0.903227	0.892785	0.96201	0.723159	0.661124	0.720984	0.820284	0.495535	0.455928	0.0593605	0.0629725	-0.293254	0.420051	0.809839	0.341242	0.754396	0.69161	0.9063	0.175603	0.575555	0.594191	0.80276	-0.0247091	-0.0647235	0.626291	0.456641	0.907137	0.73068	0.887642	0.725582	0.525204	0.666231	0.871924	0.868298	0.413927	0.292349	0.211309	-0.268882	0.369607	0.453886	0.578528	0.444553
NTS	0.0936536	0.0861577	0.187702	0.0320339	-0.157719	0.277619	0.322793	0.51359	0.443741	0.404153	0.303319	0.389078	0.583327	0.724104	0.72944	0.457009	-0.414888	-0.442087	-0.404822	0.621228	0.623943	0.411178	0.454569	0.535996	0.787656	-0.126437	0.530612	0.577693	0.657677	0.384007	0.622116	0.832358	0.711077	0.53059	0.468999	0.63543	0.49244	0.93695	0.058545	0.510657	0.126862	0.0931595	0.341341	-0.323658	-0.663798	0.483086	0.550021	0.865398	0.80712
PB	-0.0418377	-0.024572	-0.146931	-0.0737216	-0.328401	-0.417904	0.30105	0.396298	0.515231	0.517264	0.341151	0.245431	0.212899	0.453021	0.173643	0.235856	-0.482271	-0.482425	-0.750739	-0.0374641	0.329359	0.210543	0.336825	0.0281742	0.690187	0.0013114	0.217022	0.485991	0.243938	-0.315436	0.473712	0.747635	0.688839	0.631167	0.361922	0.716023	0.254821	0.409328	0.16071	0.505081	0.453718	0.778517	0.537034	-0.556197	-0.803836	0.46427	0.306677	0.438218	0.891409
SLD	-0.0939802	-0.0570191	0.0123123	-0.0421833	0.151534	0.260871	0.075814	-0.111021	-0.326226	-0.212358	-0.036202	-0.217752	-0.287224	-0.153506	-0.155619	0.338762	0.322598	0.287189	0.230939	-0.430667	-0.568115	-0.138988	-0.0636965	-0.0886295	-0.419537	-0.0395442	0.194509	0.153651	-0.387948	0.269569	-0.29561	-0.271844	-0.0738792	-0.249606	0.164464	-0.175153	0.124453	-0.557185	-0.466785	-0.591901	-0.118834	-0.261999	-0.362686	0.149277	0.763985	0.0225477	0.109652	-0.291571	-0.778501
TRN	0.0383262	0.0506726	0.0342194	-0.143186	-0.104675	-0.03955	0.67621	0.58458	0.399325	0.633682	0.341993	0.0838852	0.132819	0.549841	0.0825337	0.688109	-0.217734	-0.22728	-0.607569	-0.249045	0.124538	-0.164156	0.362284	0.318407	0.50239	-0.284154	0.483135	0.672156	0.236819	0.10768	-0.256877	0.463753	0.572351	0.546791	0.657337	0.802398	0.76966	-0.0221886	0.233341	0.226035	0.613278	0.324313	-0.171868	-0.117754	-0.102856	0.735943	0.710246	0.450156	0.162686
LDT	-0.28399	-0.27484	-0.228207	-0.45199	-0.335275	-0.0546148	0.393615	0.273944	-0.00363819	0.275177	-0.0185041	-0.281033	-0.181292	0.307605	-0.0983663	0.669679	-0.376374	-0.38932	-0.621852	-0.437487	-0.213772	-0.4508	0.0279057	0.129629	0.175324	-0.576469	0.326116	0.535046	-0.0464068	0.291335	-0.324451	0.258292	0.490044	0.172074	0.437249	0.553833	0.66681	-0.218255	-0.0181479	-0.173099	0.254377	0.0395374	-0.494113	-0.238228	-0.0233259	0.813963	0.758787	0.386771	-0.0046711
PRNr	-0.3639	-0.328496	-0.161351	-0.381812	-0.399246	0.290939	0.259438	0.257648	-0.0706866	0.069286	0.0460709	-0.12314	0.0253284	0.502921	0.405332	0.887657	-0.468736	-0.532598	-0.552792	-0.0950849	-0.185515	0.0234889	0.182631	0.234456	0.31879	-0.479064	0.643582	0.807875	0.0474977	0.663403	0.409382	0.657583	0.851751	0.178494	0.572759	0.537112	0.634094	0.286409	-0.579447	-0.284779	-0.121619	-0.0800161	-0.142637	-0.545643	-0.154053	0.81272	0.851398	0.668701	0.223069
CS	-0.615469	-0.647712	-0.601715	-0.561766	-0.63564	-0.333501	-0.805107	-0.66337	-0.585168	-0.669253	-0.736421	-0.543295	-0.421935	-0.463956	-0.238631	-0.482899	-0.613076	-0.590833	-0.183481	0.00896427	-0.231388	-0.352267	-0.674324	-0.441597	-0.353254	-0.449084	-0.585251	-0.507257	-0.320087	0.0356051	0.321986	-0.178531	-0.131166	-0.605606	-0.715606	-0.479381	-0.528494	0.131345	-0.220981	-0.322456	-0.746785	-0.276241	-0.158939	-0.476378	-0.590317	-0.00988669	-0.171311	0.0312409	0.42538
[truncated: 14 more columns]

## Sheet: Saline
Row	ORB	PL	ACA	ILA	MO	MOB	TT	AI	SS	COA	PIR	AUD	ENT	RSP	VIS	ECT	TEa	DG	CA	LSc	LSr	BST	ACB	MS	CEA	OT	PVT	RE	LH	LAT	RT	MPO	PVH	LPO	MEPO	MPN	SO	VLPO	ARH	LHA	PVi	STN	MBO	TU	ZI	APN	EW	MRN	PAG
ORB	1	0.964971	0.950964	0.946666	0.941575	0.91313	0.928467	0.792784	0.483948	0.600204	0.757571	-0.330888	-0.120587	-0.116967	-0.241015	-0.154942	-0.183735	0.177688	-0.0649811	0.924263	0.938637	0.725138	0.757689	0.886892	0.632682	0.260317	0.858133	0.934671	0.355026	-0.110596	0.363705	0.563159	0.702965	0.723298	0.883215	0.169715	0.131294	-0.0253177	0.162634	0.339084	0.109099	-0.385656	0.160278	0.474968	0.56323	0.386399	0.513514	0.119275	0.174166
PL	0.964971	1	0.907056	0.925998	0.834998	0.83477	0.883941	0.864844	0.592908	0.602674	0.805771	-0.287276	-0.120746	-0.17538	-0.220948	-0.151558	-0.130431	0.0842383	-0.0298561	0.983677	0.958566	0.774688	0.722393	0.892183	0.709678	0.249643	0.842867	0.901299	0.214412	-0.161172	0.420135	0.612432	0.735051	0.732929	0.938879	0.263763	0.093243	0.0696156	-0.0155298	0.230228	0.0814024	-0.517374	0.18219	0.301463	0.548527	0.423085	0.604144	0.207837	0.172482
ACA	0.950964	0.907056	1	0.878115	0.876873	0.87186	0.902144	0.796138	0.348924	0.582002	0.755495	-0.17697	-0.0685386	-0.0387931	-0.152143	-0.123798	-0.131915	0.268388	0.123414	0.879596	0.943265	0.790442	0.788685	0.893523	0.590173	0.298078	0.821951	0.940405	0.320835	0.0502539	0.435188	0.505488	0.686433	0.584502	0.883322	0.154614	0.151044	0.0179747	0.23129	0.517786	0.264863	-0.333542	0.263055	0.661382	0.686116	0.574663	0.678648	0.3366	0.395785
ILA	0.946666	0.925998	0.878115	1	0.922929	0.94027	0.92495	0.755474	0.46231	0.479722	0.636484	-0.433401	-0.307443	-0.346524	-0.469467	-0.232237	-0.298224	-0.113694	-0.237237	0.9021	0.938239	0.681092	0.820686	0.915148	0.692517	0.414792	0.90118	0.798229	0.325978	-0.319867	0.179397	0.594679	0.707709	0.730127	0.903118	0.0499719	-0.0902773	0.0683056	0.0982991	0.369956	0.215017	-0.316992	-0.0947991	0.333897	0.473349	0.207853	0.36402	0.0181822	0.0371532
MO	0.941575	0.834998	0.876873	0.922929	1	0.922844	0.88715	0.622061	0.320282	0.452261	0.553522	-0.466271	-0.270096	-0.190094	-0.393234	-0.25889	-0.355006	0.109633	-0.199188	0.773034	0.823511	0.5382	0.705023	0.783247	0.495749	0.250542	0.854887	0.826846	0.49597	-0.158638	0.185776	0.44771	0.623774	0.636007	0.741749	0.00158478	0.021622	-0.0278126	0.272302	0.368362	0.139337	-0.176339	-0.0295995	0.526757	0.453258	0.194816	0.26523	-0.120233	0.00498048
MOB	0.91313	0.83477	0.87186	0.94027	0.922844	1	0.905849	0.643028	0.398601	0.632254	0.687486	-0.240978	-0.0825701	-0.0940846	-0.289659	0.00964375	-0.103023	0.0971238	-0.209854	0.807969	0.889676	0.62475	0.899658	0.9279	0.704834	0.418177	0.7986	0.827646	0.471071	-0.168591	0.147828	0.525874	0.550197	0.771543	0.831254	-0.0608239	-0.00317513	-0.212825	0.364679	0.573534	0.248031	-0.120551	0.0482432	0.528361	0.593806	0.264137	0.287284	0.0674133	0.178349
TT	0.928467	0.883941	0.902144	0.92495	0.88715	0.905849	1	0.639954	0.231658	0.456819	0.641095	-0.389839	-0.089433	-0.170673	-0.293372	-0.061291	-0.139162	0.0733346	-0.291835	0.813125	0.885751	0.750005	0.873868	0.898835	0.51391	0.521316	0.717041	0.80415	0.363296	-0.345512	0.0720527	0.503573	0.587465	0.620642	0.806285	-0.0604656	0.165235	-0.118392	0.344255	0.500726	0.352633	-0.295657	0.0004867	0.457633	0.490116	0.252247	0.46974	0.070023	0.309251
AI	0.792784	0.864844	0.796138	0.755474	0.622061	0.643028	0.639954	1	0.739021	0.527659	0.697671	-0.183555	-0.160363	-0.257899	-0.243334	-0.304764	-0.217512	0.0118662	0.354011	0.906385	0.867148	0.852888	0.54067	0.758829	0.670745	0.264147	0.824964	0.787388	-0.201793	0.115311	0.717734	0.813635	0.908473	0.702685	0.893544	0.635971	0.143264	0.282272	-0.339437	0.0984051	-0.157292	-0.728503	0.199086	0.287124	0.422689	0.483602	0.672118	0.50451	0.153102
SS	0.483948	0.592908	0.348924	0.46231	0.320282	0.398601	0.231658	0.739021	1	0.644785	0.629063	0.0220369	0.0392627	-0.0646892	-0.0365934	-0.0444914	0.040008	0.00664838	0.265669	0.675828	0.529232	0.426628	0.221562	0.460578	0.73054	-0.0792516	0.541787	0.526613	-0.210145	0.164833	0.659953	0.694856	0.57833	0.811598	0.612612	0.67516	0.0483821	0.0303053	-0.481169	-0.264855	-0.574929	-0.588038	0.268705	-0.132129	0.226486	0.230447	0.221244	0.274855	-0.20959
COA	0.600204	0.602674	0.582002	0.479722	0.452261	0.632254	0.456819	0.527659	0.644785	1	0.925885	0.460092	0.551989	0.550382	0.457655	0.54789	0.559347	0.583687	0.239027	0.643599	0.624625	0.441367	0.5848	0.676663	0.784891	-0.0673948	0.376956	0.777852	0.348668	0.359331	0.507172	0.346241	0.189831	0.749581	0.626802	0.190887	0.219746	-0.53836	0.297445	0.391141	-0.0869864	-0.113661	0.716199	0.421397	0.769146	0.62067	0.402375	0.438319	0.402925
PIR	0.757571	0.805771	0.755495	0.636484	0.553522	0.687486	0.641095	0.697671	0.629063	0.925885	1	0.307105	0.404086	0.375032	0.343969	0.381564	0.4367	0.486515	0.216387	0.832776	0.803982	0.636122	0.66897	0.807128	0.809554	0.0135791	0.523702	0.887121	0.299044	0.208164	0.541838	0.405279	0.367658	0.711001	0.805601	0.225603	0.206659	-0.316801	0.189918	0.374712	0.0570025	-0.301894	0.668715	0.394234	0.812976	0.715419	0.655363	0.490384	0.475611
AUD	-0.330888	-0.287276	-0.17697	-0.433401	-0.466271	-0.240978	-0.389839	-0.183555	0.0220369	0.460092	0.307105	1	0.701982	0.775057	0.830201	0.743141	0.828568	0.551384	0.52395	-0.187859	-0.168911	-0.163053	-0.0503909	-0.0826025	0.220862	-0.358071	-0.412794	-0.0175497	0.0914487	0.639291	0.262141	-0.346578	-0.513938	-0.133963	-0.114885	-0.0624244	0.0189862	-0.407711	0.237878	0.323705	0.117677	0.352509	0.763614	0.204363	0.525432	0.607825	0.226648	0.595317	0.547458
ENT	-0.120587	-0.120746	-0.0685386	-0.307443	-0.270096	-0.0825701	-0.089433	-0.160363	0.0392627	0.551989	0.404086	0.701982	1	0.889608	0.895063	0.893322	0.916332	0.751002	0.211856	-0.129361	-0.130208	0.0785297	0.0874952	0.00267484	0.0410384	-0.0770022	-0.517719	0.136783	0.0557484	0.39686	0.145327	-0.0882149	-0.423106	0.144545	-0.155674	0.0304885	0.630528	-0.822179	0.485625	0.237951	-0.102303	0.0620179	0.74622	0.219738	0.307143	0.3611	0.189651	0.427842	0.649798
RSP	-0.116967	-0.17538	-0.0387931	-0.346524	-0.190094	-0.0940846	-0.170673	-0.257899	-0.0646892	0.550382	0.375032	0.775057	0.889608	1	0.946311	0.806771	0.831448	0.905336	0.330402	-0.180493	-0.173683	-0.154248	-0.0353743	-0.0888009	0.00394392	-0.416518	-0.442754	0.189478	0.345399	0.611276	0.204205	-0.368802	-0.532693	-0.0242246	-0.212469	-0.0973552	0.432708	-0.735506	0.566013	0.271762	-0.044923	0.327735	0.854602	0.39348	0.462083	0.501268	0.153094	0.315651	0.560453
VIS	-0.241015	-0.220948	-0.152143	-0.469467	-0.393234	-0.289659	-0.293372	-0.243334	-0.0365934	0.457655	0.343969	0.830201	0.895063	0.946311	1	0.786705	0.880842	0.815777	0.408615	-0.20507	-0.241126	-0.137273	-0.166262	-0.182497	-0.0310907	-0.453547	-0.545528	0.0772242	0.135199	0.582399	0.255541	-0.377506	-0.539838	-0.13227	-0.243705	0.0125146	0.429232	-0.591258	0.353136	0.112282	-0.0722775	0.182021	0.877055	0.191552	0.384589	0.535211	0.265392	0.424285	0.583259
ECT	-0.154942	-0.151558	-0.123798	-0.232237	-0.25889	0.00964375	-0.061291	-0.304764	-0.0444914	0.54789	0.381564	0.743141	0.893322	0.806771	0.786705	1	0.964562	0.546878	-0.0582226	-0.14111	-0.105598	-0.0825287	0.234867	0.0900986	0.208103	-0.0298568	-0.499144	0.0413264	0.296039	0.167356	-0.152484	-0.25537	-0.610452	0.129488	-0.114638	-0.32943	0.270197	-0.860819	0.60677	0.412646	0.181231	0.364947	0.594768	0.115147	0.408115	0.268537	0.0160725	0.264209	0.571405
TEa	-0.183735	-0.130431	-0.131915	-0.298224	-0.355006	-0.103023	-0.139162	-0.217512	0.040008	0.559347	0.4367	0.828568	0.916332	0.831448	0.880842	0.964562	1	0.586842	0.12368	-0.0988283	-0.103534	-0.0388913	0.129107	0.0470764	0.220104	-0.14784	-0.508446	0.0589214	0.166254	0.278627	0.0242527	-0.24634	-0.561029	0.0781989	-0.0873011	-0.167004	0.296391	-0.736476	0.436291	0.294711	0.108373	0.228507	0.721564	0.0588981	0.434292	0.409436	0.177582	0.408651	0.612151
DG	0.177688	0.0842383	0.268388	-0.113694	0.109633	0.0971238	0.0733346	0.0118662	0.00664838	0.583687	0.486515	0.551384	0.751002	0.905336	0.815777	0.546878	0.586842	1	0.448365	0.0478236	0.0559457	0.08708	0.0520565	0.0661202	-0.0010608	-0.385614	-0.159609	0.468004	0.349274	0.685259	0.426525	-0.183322	-0.205502	0.0747864	-0.0180087	0.0943565	0.580271	-0.585579	0.530924	0.270117	-0.1069	0.106096	0.873871	0.623291	0.522022	0.622226	0.366404	0.356763	0.582633
CA	-0.0649811	-0.0298561	0.123414	-0.237237	-0.199188	-0.209854	-0.291835	0.354011	0.265669	0.239027	0.216387	0.52395	0.211856	0.330402	0.408615	-0.0582226	0.12368	0.448365	1	0.0658302	0.0386828	0.206998	-0.239064	-0.0823242	0.0645152	-0.350869	0.0618017	0.211357	-0.370234	0.898436	0.851483	0.131307	0.238297	-0.0846122	0.0885557	0.639868	0.207069	0.242098	-0.314317	-0.0229543	-0.296869	-0.268877	0.613507	0.387368	0.301577	0.686916	0.529842	0.759843	0.325728
LSc	0.924263	0.983677	0.879596	0.9021	0.773034	0.807969	0.813125	0.906385	0.675828	0.643599	0.832776	-0.187859	-0.129361	-0.180493	-0.20507	-0.14111	-0.0988283	0.0478236	0.0658302	1	0.967424	0.766383	0.707445	0.897683	0.800846	0.211461	0.861621	0.884258	0.161032	-0.0900993	0.495396	0.631561	0.743095	0.747498	0.974628	0.315276	0.00436341	0.121969	-0.105535	0.227496	0.0639051	-0.516923	0.220242	0.269883	0.594939	0.484623	0.623863	0.298884	0.161488
LSr	0.938637	0.958566	0.943265	0.938239	0.823511	0.889676	0.885751	0.867148	0.529232	0.624625	0.803982	-0.168911	-0.130208	-0.173683	-0.241126	-0.105598	-0.103534	0.0559457	0.0386828	0.967424	1	0.805213	0.837332	0.965443	0.783847	0.353245	0.870351	0.8906	0.234985	-0.0947533	0.404876	0.606292	0.719045	0.708432	0.985535	0.179445	-0.0117722	0.0717172	0.0637072	0.447872	0.244063	-0.395652	0.177549	0.434439	0.666383	0.506341	0.630574	0.339016	0.284046
BST	0.725138	0.774688	0.790442	0.681092	0.5382	0.62475	0.750005	0.852888	0.426628	0.441367	0.636122	-0.163053	0.0785297	-0.154248	-0.137273	-0.0825287	-0.0388913	0.08708	0.206998	0.766383	0.805213	1	0.698849	0.782206	0.468897	0.61453	0.578974	0.707681	-0.258683	-0.0305122	0.479332	0.799569	0.784989	0.602032	0.783643	0.464198	0.433502	0.0426452	-0.0341391	0.343077	0.0815379	-0.710316	0.171649	0.400725	0.375119	0.433155	0.746451	0.602789	0.509449
ACB	0.757689	0.722393	0.788685	0.820686	0.705023	0.899658	0.873868	0.54067	0.221562	0.5848	0.66897	-0.0503909	0.0874952	-0.0353743	-0.166262	0.234867	0.129107	0.0520565	-0.239064	0.707445	0.837332	0.698849	1	0.944526	0.683248	0.634085	0.584897	0.68832	0.361978	-0.256405	-0.00367085	0.466228	0.396119	0.644813	0.789604	-0.200937	0.0283978	-0.298182	0.467139	0.767094	0.506333	-0.0714179	0.070553	0.494519	0.637195	0.320791	0.397298	0.27069	0.468474
MS	0.886892	0.892183	0.893523	0.915148	0.783247	0.9279	0.898835	0.758829	0.460578	0.676663	0.807128	-0.0826025	0.00267484	-0.0888009	-0.182497	0.0900986	0.0470764	0.0661202	-0.0823242	0.897683	0.965443	0.782206	0.944526	1	0.810217	0.476307	0.762801	0.837141	0.296961	-0.162697	0.250608	0.57827	0.584981	0.74483	0.942954	0.0298857	0.0057297	-0.1273	0.237091	0.594977	0.341391	-0.269605	0.167367	0.448082	0.691703	0.448349	0.539849	0.334072	0.373657
CEA	0.632682	0.709678	0.590173	0.692517	0.495749	0.704834	0.51391	0.670745	0.73054	0.784891	0.809554	0.220862	0.0410384	0.00394392	-0.0310907	0.208103	0.220104	-0.0010608	0.0645152	0.800846	0.783847	0.468897	0.683248	0.810217	1	0.106613	0.655327	0.658197	0.248195	0.0103987	0.366499	0.454336	0.388177	0.754669	0.846846	0.114945	-0.289997	-0.0921166	-0.039476	0.352326	0.110326	-0.151811	0.29596	0.139723	0.697941	0.46405	0.350127	0.341006	0.119352
OT	0.260317	0.249643	0.298078	0.414792	0.250542	0.418177	0.521316	0.264147	-0.0792516	-0.0673948	0.0135791	-0.358071	-0.0770022	-0.416518	-0.453547	-0.0298568	-0.14784	-0.385614	-0.350869	0.211461	0.353245	0.61453	0.634085	0.476307	0.106613	1	0.182779	0.0744908	-0.274832	-0.503981	-0.284182	0.578431	0.386517	0.324538	0.313177	-0.0562657	0.217507	-0.0949068	0.183789	0.446785	0.328116	-0.278431	-0.457923	0.133524	-0.103408	-0.244361	0.0998329	0.173232	0.29334
PVT	0.858133	0.842867	0.821951	0.90118	0.854887	0.7986	0.717041	0.824964	0.541787	0.376956	0.523702	-0.412794	-0.517719	-0.442754	-0.545528	-0.499144	-0.508446	-0.159609	0.0618017	0.861621	0.870351	0.578974	0.584897	0.762801	0.655327	0.182779	1	0.748054	0.204602	-0.0665209	0.421002	0.575279	0.816064	0.607967	0.867587	0.252713	-0.248186	0.37546	-0.17736	0.205741	0.0573189	-0.34782	-0.0879425	0.345518	0.435262	0.2907	0.375857	0.081691	-0.139658
RE	0.934671	0.901299	0.940405	0.798229	0.826846	0.827646	0.80415	0.787388	0.526613	0.777852	0.887121	-0.0175497	0.136783	0.189478	0.0772242	0.0413264	0.0589214	0.468004	0.211357	0.884258	0.8906	0.707681	0.68832	0.837141	0.658197	0.0744908	0.748054	1	0.360379	0.209534	0.573447	0.482752	0.599206	0.689701	0.842529	0.263909	0.247672	-0.147937	0.219303	0.38934	0.0443833	-0.347707	0.489762	0.614687	0.735024	0.643084	0.647344	0.347491	0.364911
LH	0.355026	0.214412	0.320835	0.325978	0.49597	0.471071	0.363296	-0.201793	-0.210145	0.348668	0.299044	0.0914487	0.0557484	0.345399	0.135199	0.296039	0.166254	0.349274	-0.370234	0.161032	0.234985	-0.258683	0.361978	0.296961	0.248195	-0.274832	0.204602	0.360379	1	-0.063175	-0.304615	-0.478939	-0.339955	0.0623258	0.155935	-0.702156	-0.307066	-0.384603	0.700747	0.481191	0.468575	0.674489	0.19393	0.391676	0.560203	0.183588	-0.117622	-0.396183	0.0584686
LAT	-0.110596	-0.161172	0.0502539	-0.319867	-0.158638	-0.168591	-0.345512	0.115311	0.164833	0.359331	0.208164	0.639291	0.39686	0.611276	0.582399	0.167356	0.278627	0.685259	0.898436	-0.0900993	-0.0947533	-0.0305122	-0.256405	-0.162697	0.0103987	-0.503981	-0.0665209	0.209534	-0.063175	1	0.721814	-0.0740246	-0.0254625	-0.0749082	-0.0818317	0.427322	0.241314	-0.0848825	0.00237023	0.0793491	-0.319985	0.0438733	0.720692	0.521971	0.363748	0.631676	0.291364	0.5741	0.30446
RT	0.363705	0.420135	0.435188	0.179397	0.185776	0.147828	0.0720527	0.717734	0.659953	0.507172	0.541838	0.262141	0.145327	0.204205	0.255541	-0.152484	0.0242527	0.426525	0.851483	0.495396	0.404876	0.479332	-0.00367085	0.250608	0.366499	-0.284182	0.421002	0.573447	-0.304615	0.721814	1	0.474937	0.576507	0.361438	0.449938	0.828791	0.293858	0.215537	-0.406779	-0.132819	-0.479905	-0.577408	0.610318	0.34048	0.375609	0.676628	0.622828	0.664959	0.189747
MPO	0.563159	0.612432	0.505488	0.594679	0.44771	0.525874	0.503573	0.813635	0.694856	0.346241	0.405279	-0.346578	-0.0882149	-0.368802	-0.377506	-0.25537	-0.24634	-0.183322	0.131307	0.631561	0.606292	0.799569	0.466228	0.57827	0.454336	0.578431	0.575279	0.482752	-0.478939	-0.0740246	0.474937	1	0.855855	0.782867	0.623936	0.681359	0.3488	0.0820138	-0.336332	-0.0186289	-0.379335	-0.78987	-0.106702	0.0916522	-0.0108759	0.018552	0.297646	0.357657	0.00891747
PVH	0.702965	0.735051	0.686433	0.707709	0.623774	0.550197	0.587465	0.908473	0.57833	0.189831	0.367658	-0.513938	-0.423106	-0.532693	-0.539838	-0.610452	-0.561029	-0.205502	0.238297	0.743095	0.719045	0.784989	0.396119	0.584981	0.388177	0.386517	0.816064	0.599206	-0.339955	-0.0254625	0.576507	0.855855	1	0.576226	0.723375	0.656614	0.155424	0.457795	-0.433925	-0.0471728	-0.235981	-0.7746	-0.144203	0.222068	0.0856661	0.174666	0.475245	0.28789	-0.0678136
LPO	0.723298	0.732929	0.584502	0.730127	0.636007	0.771543	0.620642	0.702685	0.811598	0.749581	0.711001	-0.133963	0.144545	-0.0242246	-0.13227	0.129488	0.0781989	0.0747864	-0.0846122	0.747498	0.708432	0.602032	0.644813	0.74483	0.754669	0.324538	0.607967	0.689701	0.0623258	-0.0749082	0.361438	0.782867	0.576226	1	0.712645	0.368177	0.211106	-0.32434	0.00905798	0.143171	-0.30584	-0.441768	0.144251	0.150723	0.323581	0.112405	0.149715	0.154057	-0.00879162
MEPO	0.883215	0.938879	0.883322	0.903118	0.741749	0.831254	0.806285	0.893544	0.612612	0.626802	0.805601	-0.114885	-0.155674	-0.212469	-0.243705	-0.114638	-0.0873011	-0.0180087	0.0885557	0.974628	0.985535	0.783643	0.789604	0.942954	0.846846	0.313177	0.867587	0.842529	0.155935	-0.0818317	0.449938	0.623936	0.723375	0.712645	1	0.236485	-0.0933343	0.141296	-0.0628301	0.381104	0.203519	-0.427878	0.180003	0.331338	0.656231	0.517681	0.631338	0.385196	0.234463
MPN	0.169715	0.263763	0.154614	0.0499719	0.00158478	-0.0608239	-0.0604656	0.635971	0.67516	0.190887	0.225603	-0.0624244	0.0304885	-0.0973552	0.0125146	-0.32943	-0.167004	0.0943565	0.639868	0.315276	0.179445	0.464198	-0.200937	0.0298857	0.114945	-0.0562657	0.252713	0.263909	-0.702156	0.427322	0.828791	0.681359	0.656614	0.368177	0.236485	1	0.444372	0.292436	-0.667259	-0.486905	-0.753471	-0.840821	0.235446	-0.040305	-0.152924	0.20821	0.367344	0.475139	-0.0742317
SO	0.131294	0.093243	0.151044	-0.0902773	0.021622	-0.00317513	0.165235	0.143264	0.0483821	0.219746	0.206659	0.0189862	0.630528	0.432708	0.429232	0.270197	0.296391	0.580271	0.207069	0.00436341	-0.0117722	0.433502	0.0283978	0.0057297	-0.289997	0.217507	-0.248186	0.247672	-0.307066	0.241314	0.293858	0.3488	0.155424	0.211106	-0.0933343	0.444372	1	-0.471324	0.225857	-0.0475625	-0.382759	-0.490697	0.381123	0.284568	-0.1126	0.107438	0.293561	0.312128	0.470713
VLPO	-0.0253177	0.0696156	0.0179747	0.0683056	-0.0278126	-0.212825	-0.118392	0.282272	0.0303053	-0.53836	-0.316801	-0.407711	-0.822179	-0.735506	-0.591258	-0.860819	-0.736476	-0.585579	0.242098	0.121969	0.0717172	0.0426452	-0.298182	-0.1273	-0.0921166	-0.0949068	0.37546	-0.147937	-0.384603	-0.0848825	0.215537	0.0820138	0.457795	-0.32434	0.141296	0.292436	-0.471324	1	-0.748029	-0.377517	0.0102916	-0.314551	-0.417266	-0.247724	-0.236234	-0.0136325	0.195168	0.00191034	-0.397248
ARH	0.162634	-0.0155298	0.23129	0.0982991	0.272302	0.364679	0.344255	-0.339437	-0.481169	0.297445	0.189918	0.237878	0.485625	0.566013	0.353136	0.60677	0.436291	0.530924	-0.314317	-0.105535	0.0637072	-0.0341391	0.467139	0.237091	-0.039476	0.183789	-0.17736	0.219303	0.700747	0.00237023	-0.406779	-0.336332	-0.433925	0.00905798	-0.0628301	-0.667259	0.225857	-0.748029	1	0.740625	0.522436	0.594658	0.244933	0.598992	0.421968	0.133803	-0.0558267	-0.0885202	0.528635
LHA	0.339084	0.230228	0.517786	0.369956	0.368362	0.573534	0.500726	0.0984051	-0.264855	0.391141	0.374712	0.323705	0.237951	0.271762	0.112282	0.412646	0.294711	0.270117	-0.0229543	0.227496	0.447872	0.343077	0.767094	0.594977	0.352326	0.446785	0.205741	0.38934	0.481191	0.0793491	-0.132819	-0.0186289	-0.0471728	0.143171	0.381104	-0.486905	-0.0475625	-0.377517	0.740625	1	0.743438	0.410943	0.207816	0.732831	0.694678	0.440087	0.299948	0.363344	0.681352
PVi	0.109099	0.0814024	0.264863	0.215017	0.139337	0.248031	0.352633	-0.157292	-0.574929	-0.0869864	0.0570025	0.117677	-0.102303	-0.044923	-0.0722775	0.181231	0.108373	-0.1069	-0.296869	0.0639051	0.244063	0.0815379	0.506333	0.341391	0.110326	0.328116	0.0573189	0.0443833	0.468575	-0.319985	-0.479905	-0.379335	-0.235981	-0.30584	0.203519	-0.753471	-0.382759	0.0102916	0.522436	0.743438	1	0.490658	-0.0964312	0.301493	0.459363	0.240865	0.248137	0.0673425	0.479278
STN	-0.385656	-0.517374	-0.333542	-0.316992	-0.176339	-0.120551	-0.295657	-0.728503	-0.588038	-0.113661	-0.301894	0.352509	0.0620179	0.327735	0.182021	0.364947	0.228507	0.106096	-0.268877	-0.516923	-0.395652	-0.710316	-0.0714179	-0.269605	-0.151811	-0.278431	-0.34782	-0.347707	0.674489	0.0438733	-0.577408	-0.78987	-0.7746	-0.441768	-0.427878	-0.840821	-0.490697	-0.314551	0.594658	0.410943	0.490658	1	-0.0257532	0.154062	0.18091	-0.0957867	-0.501697	-0.368126	-0.0217162
MBO	0.160278	0.18219	0.263055	-0.0947991	-0.0295995	0.0482432	0.0004867	0.199086	0.268705	0.716199	0.668715	0.763614	0.74622	0.854602	0.877055	0.594768	0.721564	0.873871	0.613507	0.220242	0.177549	0.171649	0.070553	0.167367	0.29596	-0.457923	-0.0879425	0.489762	0.19393	0.720692	0.610318	-0.106702	-0.144203	0.144251	0.180003	0.235446	0.381123	-0.417266	0.244933	0.207816	-0.0964312	-0.0257532	1	0.42653	0.673228	0.824757	0.559417	0.605493	0.610431
TU	0.474968	0.301463	0.661382	0.333897	0.526757	0.528361	0.457633	0.287124	-0.132129	0.421397	0.394234	0.204363	0.219738	0.39348	0.191552	0.115147	0.0588981	0.623291	0.387368	0.269883	0.434439	0.400725	0.494519	0.448082	0.139723	0.133524	0.345518	0.614687	0.391676	0.521971	0.34048	0.0916522	0.222068	0.150723	0.331338	-0.040305	0.284568	-0.247724	0.598992	0.732831	0.301493	0.154062	0.42653	1	0.632447	0.59504	0.436444	0.410995	0.59364
ZI	0.56323	0.548527	0.686116	0.473349	0.453258	0.593806	0.490116	0.422689	0.226486	0.769146	0.812976	0.525432	0.307143	0.462083	0.384589	0.408115	0.434292	0.522022	0.301577	0.594939	0.666383	0.375119	0.637195	0.691703	0.697941	-0.103408	0.435262	0.735024	0.560203	0.363748	0.375609	-0.0108759	0.0856661	0.323581	0.656231	-0.152924	-0.1126	-0.236234	0.421968	0.694678	0.459363	0.18091	0.673228	0.632447	1	0.857228	0.613783	0.504198	0.596122
APN	0.386399	0.423085	0.574663	0.207853	0.194816	0.264137	0.252247	0.483602	0.230447	0.62067	0.715419	0.607825	0.3611	0.501268	0.535211	0.268537	0.409436	0.622226	0.686916	0.484623	0.506341	0.433155	0.320791	0.448349	0.46405	-0.244361	0.2907	0.643084	0.183588	0.631676	0.676628	0.018552	0.174666	0.112405	0.517681	0.20821	0.107438	-0.0136325	0.133803	0.440087	0.240865	-0.0957867	0.824757	0.59504	0.857228	1	0.836142	0.761372	0.682096
EW	0.513514	0.604144	0.678648	0.36402	0.26523	0.287284	0.46974	0.672118	0.221244	0.402375	0.655363	0.226648	0.189651	0.153094	0.265392	0.0160725	0.177582	0.366404	0.529842	0.623863	0.630574	0.746451	0.397298	0.539849	0.350127	0.0998329	0.375857	0.647344	-0.117622	0.291364	0.622828	0.297646	0.475245	0.149715	0.631338	0.367344	0.293561	0.195168	-0.0558267	0.299948	0.248137	-0.501697	0.559417	0.436444	0.613783	0.836142	1	0.757569	0.693372
MRN	0.119275	0.207837	0.3366	0.0181822	-0.120233	0.0674133	0.070023	0.50451	0.274855	0.438319	0.490384	0.595317	0.427842	0.315651	0.424285	0.264209	0.408651	0.356763	0.759843	0.298884	0.339016	0.602789	0.27069	0.334072	0.341006	0.173232	0.081691	0.347491	-0.396183	0.5741	0.664959	0.357657	0.28789	0.154057	0.385196	0.475139	0.312128	0.00191034	-0.0885202	0.363344	0.0673425	-0.368126	0.605493	0.410995	0.504198	0.761372	0.757569	1	0.729314
PAG	0.174166	0.172482	0.395785	0.0371532	0.00498048	0.178349	0.309251	0.153102	-0.20959	0.402925	0.475611	0.547458	0.649798	0.560453	0.583259	0.571405	0.612151	0.582633	0.325728	0.161488	0.284046	0.509449	0.468474	0.373657	0.119352	0.29334	-0.139658	0.364911	0.0584686	0.30446	0.189747	0.00891747	-0.0678136	-0.00879162	0.234463	-0.0742317	0.470713	-0.397248	0.528635	0.681352	0.479278	-0.0217162	0.610431	0.59364	0.596122	0.682096	0.693372	0.729314	1
DR	0.203755	0.263134	0.372104	0.161446	0.035074	0.0881198	0.336309	0.465515	-0.0457744	-0.0614394	0.141794	-0.0917296	0.0955933	-0.17043	-0.0585371	-0.132618	-0.0548061	0.00112529	0.314312	0.245941	0.319006	0.781578	0.30947	0.299663	-0.0739284	0.643157	0.10164	0.206725	-0.581428	0.0157726	0.292193	0.523993	0.51667	0.0448046	0.297267	0.40842	0.524341	0.188157	-0.0966584	0.235683	0.159928	-0.625889	0.0353221	0.282825	0.022964	0.283739	0.673221	0.659775	0.609195
SNr	-0.121949	-0.0953379	0.105923	-0.315907	-0.271962	-0.279755	-0.243338	0.264221	0.0465647	0.118936	0.136886	0.486026	0.332619	0.368399	0.466898	0.012573	0.184707	0.496169	0.934045	-0.039538	-0.0309833	0.302421	-0.210326	-0.122235	-0.140023	-0.159341	-0.107647	0.143819	-0.458889	0.810027	0.728139	0.116854	0.18818	-0.201918	-0.0139691	0.584003	0.433029	0.155402	-0.177747	0.0532208	-0.185619	-0.318981	0.585815	0.435202	0.212552	0.645722	0.606044	0.811057	0.532798
PPN	0.473207	0.575891	0.525775	0.564298	0.343587	0.460766	0.321524	0.815899	0.662124	0.378168	0.480468	0.0362393	-0.340754	-0.38149	-0.337753	-0.309327	-0.224558	-0.277128	0.411906	0.699232	0.69284	0.57165	0.432996	0.615092	0.754228	0.197645	0.742418	0.470138	-0.23222	0.152511	0.587845	0.617022	0.704676	0.497918	0.78468	0.454904	-0.337209	0.464404	-0.475056	0.172291	0.0103615	-0.416885	0.0536156	0.136196	0.428407	0.440898	0.473362	0.53518	0.0149268
RR	-0.130984	-0.0363393	-0.0886692	0.0496473	-0.240102	0.097901	0.124864	-0.0261083	-0.0389907	0.077502	0.0774217	0.213361	0.260167	-0.0920433	-0.0170991	0.464856	0.404864	-0.344685	-0.309784	0.00380802	0.0966504	0.285406	0.469915	0.292844	0.271249	0.711795	-0.213669	-0.197579	-0.243219	-0.424084	-0.382291	0.23291	-0.121189	0.179686	0.137394	-0.241735	-0.0210941	-0.289138	0.156588	0.415938	0.40548	0.000723919	-0.176701	-0.198975	0.0382776	-0.119225	0.0191738	0.302626	0.380974
VTA	-0.423505	-0.326878	-0.256769	-0.403095	-0.573611	-0.37418	-0.159846	-0.309599	-0.479498	-0.182591	-0.100467	0.432923	0.442791	0.21983	0.391703	0.493401	0.540063	0.0129808	-0.00547034	-0.320176	-0.237838	0.100701	0.0597706	-0.112811	-0.221445	0.352258	-0.599826	-0.356436	-0.275099	-0.129356	-0.306114	-0.23882	-0.411277	-0.419279	-0.22518	-0.268222	0.1918	-0.180697	0.214946	0.309351	0.50661	0.076979	0.12791	-0.0944667	0.025266	0.143737	0.281023	0.433403	0.669524
CS	-0.639168	-0.561593	-0.495425	-0.474791	-0.661151	-0.411733	-0.565409	-0.310951	-0.174492	-0.185566	-0.305852	0.563185	0.0489537	-0.00425836	0.0974286	0.246525	0.268783	-0.316589	0.225631	-0.429516	-0.355344	-0.280229	-0.140066	-0.253633	0.0502635	0.0846679	-0.381749	-0.563318	-0.294521	0.155376	-0.156184	-0.220453	-0.385333	-0.341756	-0.25226	-0.17798	-0.447005	0.0969432	-0.140292	0.211121	0.262449	0.367339	-0.0680294	-0.195029	-0.0054224	0.0227554	-0.163564	0.355047	0.114107
PRNr	-0.633418	-0.466234	-0.505549	-0.516809	-0.760959	-0.567354	-0.610026	-0.184208	-0.048615	-0.221294	-0.232741	0.546328	0.0325685	-0.0510968	0.170048	0.149264	0.273086	-0.329713	0.341098	-0.326063	-0.3358	-0.205677	-0.296724	-0.308637	0.0402581	-0.0648209	-0.385807	-0.53982	-0.476093	0.147031	0.0181989	-0.196521	-0.292325	-0.398612	-0.201295	0.0364853	-0.390534	0.298737	-0.421203	-0.0599094	0.147525	0.0964478	0.0343884	-0.397741	-0.048615	0.1299	0.0547693	0.44083	0.103635
SLD	-0.0275369	-0.10195	-0.146859	0.189207	0.192804	0.20897	0.0985881	-0.427137	-0.304802	-0.21741	-0.27062	-0.286667	-0.426627	-0.307315	-0.442725	-0.0255866	-0.209726	-0.465224	-0.778707	-0.127975	-0.0600122	-0.488501	0.172778	0.037101	0.0863885	0.0480968	0.0789354	-0.244272	0.621432	-0.610354	-0.774382	-0.398768	-0.359021	-0.0784748	-0.0773259	-0.80846	-0.697763	-0.0516293	0.305287	0.191276	0.454492	0.670929	-0.559236	-0.220388	-0.0481437	-0.49459	-0.619446	-0.74176	-0.450881
LDT	-0.320561	-0.367061	-0.338196	-0.14397	-0.232662	0.0698351	-0.146852	-0.402553	-0.119614	0.11521	-0.13738	0.299967	0.299525	0.146205	0.0434535	0.570686	0.399409	-0.175066	-0.382716	-0.33197	-0.218786	-0.228216	0.264805	0.022221	0.15258	0.394944	-0.341524	-0.347451	0.111677	-0.19744	-0.529202	-0.0426297	-0.452074	0.160656	-0.206321	-0.458458	-0.158797	-0.581876	0.414918	0.413609	0.1985	0.501613	-0.194826	-0.0822452	-0.0358682	-0.352801	-0.547166	-0.0734161	0.0540657
LC	-0.0834266	-0.166504	0.025885	-0.0523079	0.0114254	0.0909183	0.0713472	-0.483155	-0.60855	0.0396546	0.0258418	0.374769	0.133531	0.35174	0.26055	0.439048	0.347415	0.203785	-0.275769	-0.185022	-0.0428676	-0.351232	0.247319	0.0732524	0.025666	-0.125976	-0.183819	-0.0432408	0.763277	-0.074362	-0.513178	-0.735306	-0.631788	-0.394136	-0.0912433	-0.896244	-0.407643	-0.278941	0.704434	0.642657	0.823273	0.839688	0.147066	0.299514	0.498812	0.232461	-0.0336512	-0.138703	0.351994
NTS	-0.30931	-0.351906	-0.213576	-0.318052	-0.293144	-0.0920051	-0.180269	-0.570123	-0.432862	0.238958	0.0993443	0.716904	0.554364	0.663955	0.614461	0.809861	0.745326	0.381722	-0.132354	-0.335989	-0.235315	-0.402266	0.132876	-0.0584379	0.0616548	-0.180647	-0.491063	-0.156542	0.564275	0.120921	-0.406659	-0.676355	-0.817777	-0.282029	-0.25055	-0.724916	-0.180831	-0.594959	0.689029	0.552477	0.555877	0.790335	0.397152	0.174646	0.454033	0.248507	-0.107808	0.0587207	0.458523
PB	-0.22831	-0.163218	-0.0414689	-0.280835	-0.376585	-0.221992	-0.0186801	-0.278921	-0.504522	0.0225441	0.133195	0.560286	0.499202	0.437637	0.564936	0.581359	0.639123	0.284257	0.0481166	-0.166901	-0.0808138	0.0644951	0.153151	0.0186045	-0.0944258	0.0968462	-0.469798	-0.0996543	0.0997649	0.00502502	-0.223078	-0.448336	-0.484635	-0.436403	-0.0914131	-0.421759	0.11133	-0.237694	0.413705	0.460891	0.668901	0.25073	0.390891	0.126503	0.367856	0.433889	0.445296	0.422393	0.78492
TRN	-0.195269	-0.20071	-0.0354887	-0.140546	-0.249206	0.0913767	-0.0665226	-0.189986	-0.153465	0.384606	0.23775	0.768377	0.540174	0.489531	0.456618	0.75388	0.701864	0.227069	0.111228	-0.125435	0.018003	0.0102683	0.397323	0.216405	0.329089	0.216961	-0.277258	-0.03832	0.19361	0.221214	-0.144495	-0.182507	-0.441892	0.0122988	0.0395553	-0.401173	-0.112608	-0.509692	0.508911	0.729385	0.500847	0.493224	0.358354	0.295897	0.519399	0.358895	0.0813362	0.486613	0.611058
PCG	0.448111	0.450101	0.54426	0.411548	0.358253	0.472661	0.55594	0.124631	-0.163829	0.452567	0.600067	0.320592	0.245117	0.330049	0.299087	0.44567	0.432871	0.327045	-0.148297	0.432766	0.525017	0.262406	0.637124	0.59367	0.445321	0.0557527	0.208829	0.502097	0.656637	-0.108597	-0.114162	-0.265289	-0.151726	0.0580476	0.484598	-0.538309	-0.149017	-0.251755	0.578406	0.693115	0.78148	0.301906	0.410755	0.402437	0.812674	0.59874	0.523238	0.214408	0.623348
[truncated: 14 more columns]

## Sheet: Ketamine
Row	DG	ORB	ACA	CA	MO	AUD	ENT	AI	TEa	VIS	COA	RSP	SS	ECT	PL	PIR	ILA	TT	MOB	ACB	LSr	MS	BST	CEA	OT	LSc	LAT	RT	LH	PVT	RE	MBO	ZI	PVH	TU	MPN	VLPO	PVi	SO	LHA	LPO	MEPO	MPO	ARH	STN	MRN	PPN	DR	PAG
DG	1	0.997616	0.95946	0.980732	0.982152	0.942	0.964871	0.966602	0.941506	0.894968	0.961016	0.917343	0.92875	0.823777	0.927704	0.77002	0.541019	0.433543	0.0141804	0.942913	0.926923	0.852403	0.943342	0.88683	0.680595	0.700255	0.985046	0.918463	0.95374	0.0851925	0.513575	0.967427	0.971603	0.93744	0.970863	0.944454	0.927971	0.911248	0.874931	0.950077	0.911721	0.8502	0.760361	0.726111	0.599651	0.958167	0.932437	0.975379	0.959898
ORB	0.997616	1	0.968866	0.989331	0.987995	0.954391	0.960582	0.957592	0.940365	0.890979	0.964882	0.918805	0.923707	0.825301	0.933516	0.742132	0.558987	0.449579	-0.0264654	0.946121	0.927079	0.859177	0.960419	0.8848	0.647041	0.735232	0.987732	0.929717	0.953971	0.0498953	0.499605	0.978271	0.97729	0.947662	0.978934	0.942605	0.926162	0.92817	0.8838	0.960899	0.903887	0.846288	0.744712	0.751728	0.556983	0.964492	0.94275	0.980415	0.960175
ACA	0.95946	0.968866	1	0.986206	0.988857	0.98324	0.966153	0.961586	0.979499	0.948237	0.978122	0.953918	0.945673	0.808336	0.863485	0.771183	0.491809	0.4387	-0.169427	0.927245	0.913154	0.88882	0.977875	0.873811	0.664789	0.707814	0.983521	0.938023	0.898272	0.167154	0.647622	0.992049	0.980064	0.957083	0.949002	0.90989	0.970163	0.880132	0.886653	0.927373	0.883721	0.798478	0.755506	0.637887	0.58241	0.982173	0.971965	0.944792	0.969647
CA	0.980732	0.989331	0.986206	1	0.994469	0.963423	0.945373	0.956581	0.947021	0.898921	0.98518	0.952414	0.946396	0.774715	0.904493	0.723685	0.493486	0.396904	-0.142716	0.91506	0.894545	0.847649	0.980125	0.912802	0.601379	0.720801	0.992838	0.966082	0.92323	0.0805202	0.552279	0.996924	0.991674	0.977984	0.987039	0.954336	0.949042	0.941171	0.920364	0.941196	0.881169	0.807031	0.708927	0.729579	0.518492	0.987531	0.978681	0.955106	0.948021
MO	0.982152	0.987995	0.988857	0.994469	1	0.978384	0.958263	0.968782	0.96613	0.929629	0.975805	0.945061	0.947825	0.80582	0.919458	0.780369	0.520161	0.450503	-0.0677648	0.926362	0.924052	0.891121	0.984361	0.888702	0.668654	0.721051	0.998289	0.953442	0.944822	0.146661	0.580849	0.989037	0.995427	0.973333	0.977903	0.943474	0.953633	0.92097	0.882358	0.952275	0.923616	0.854532	0.77751	0.698952	0.579521	0.989447	0.972352	0.959028	0.969901
AUD	0.942	0.954391	0.98324	0.963423	0.978384	1	0.955174	0.927831	0.967527	0.94487	0.928674	0.89051	0.887972	0.872463	0.903687	0.771807	0.617969	0.588305	-0.0593507	0.948286	0.955472	0.951992	0.984537	0.786569	0.689902	0.791938	0.966268	0.893962	0.932529	0.138078	0.582996	0.963975	0.96112	0.926159	0.925171	0.85624	0.922501	0.863273	0.798654	0.962238	0.920221	0.8702	0.821355	0.666386	0.570463	0.95441	0.932114	0.956659	0.982184
ENT	0.964871	0.960582	0.966153	0.945373	0.958263	0.955174	1	0.968112	0.982207	0.960227	0.937648	0.903033	0.913073	0.887135	0.851018	0.83973	0.544182	0.49491	-0.00597441	0.968099	0.954831	0.900287	0.915319	0.812864	0.789333	0.665597	0.956396	0.84768	0.905512	0.20277	0.648275	0.945027	0.933977	0.878247	0.894772	0.860125	0.948994	0.79387	0.81041	0.918817	0.900771	0.822654	0.824654	0.573584	0.71376	0.928627	0.897494	0.960027	0.98767
AI	0.966602	0.957592	0.961586	0.956581	0.968782	0.927831	0.968112	1	0.978186	0.956806	0.971292	0.963061	0.980515	0.763094	0.840061	0.878393	0.379363	0.332764	-0.0266003	0.889465	0.891071	0.845469	0.914647	0.907294	0.776674	0.548167	0.978128	0.916882	0.893473	0.325514	0.708404	0.952864	0.967715	0.936116	0.929607	0.938923	0.982273	0.831355	0.870538	0.874393	0.91438	0.808129	0.802064	0.539234	0.737019	0.969115	0.947348	0.909939	0.955901
TEa	0.941506	0.940365	0.979499	0.947021	0.96613	0.967527	0.982207	0.978186	1	0.991063	0.950091	0.937248	0.945641	0.831843	0.827236	0.877019	0.463847	0.455811	-0.0605063	0.9228	0.9293	0.913659	0.934562	0.832252	0.79751	0.623057	0.964937	0.882656	0.885487	0.323425	0.739223	0.952147	0.953555	0.912124	0.895562	0.871978	0.977531	0.790737	0.818312	0.893576	0.91501	0.819409	0.843499	0.509919	0.730823	0.956998	0.933708	0.919745	0.982568
VIS	0.894968	0.890979	0.948237	0.898921	0.929629	0.94487	0.960227	0.956806	0.991063	1	0.906616	0.904174	0.919169	0.821805	0.780887	0.916936	0.438098	0.472791	-0.0168264	0.889946	0.914652	0.921377	0.89683	0.775333	0.850375	0.570391	0.928479	0.831899	0.850772	0.424878	0.791278	0.906159	0.91626	0.868186	0.837306	0.81758	0.958532	0.715569	0.748774	0.851151	0.912959	0.814221	0.882176	0.411107	0.788597	0.922441	0.894254	0.873446	0.96647
COA	0.961016	0.964882	0.978122	0.98518	0.975805	0.928674	0.937648	0.971292	0.950091	0.906616	1	0.988682	0.981356	0.702226	0.828158	0.748821	0.349413	0.261341	-0.222817	0.868144	0.839668	0.789177	0.944378	0.95471	0.61186	0.599154	0.980678	0.970474	0.861057	0.181661	0.653031	0.98917	0.980738	0.974297	0.965531	0.96456	0.979994	0.900837	0.95464	0.87363	0.840453	0.729405	0.669284	0.627851	0.568953	0.98747	0.987318	0.907198	0.921523
RSP	0.917343	0.918805	0.953918	0.952414	0.945061	0.89051	0.903033	0.963061	0.937248	0.904174	0.988682	1	0.993391	0.619408	0.756559	0.769627	0.221871	0.160453	-0.27259	0.799367	0.778182	0.743985	0.907865	0.964325	0.615276	0.49103	0.95452	0.964064	0.799091	0.297941	0.736199	0.961757	0.959864	0.963268	0.930129	0.954077	0.986502	0.853274	0.951176	0.802515	0.808876	0.671995	0.646024	0.523338	0.60101	0.976039	0.98307	0.839459	0.882654
SS	0.92875	0.923707	0.945673	0.946396	0.947825	0.887972	0.913073	0.980515	0.945641	0.919169	0.981356	0.993391	1	0.636048	0.777595	0.825766	0.231271	0.179813	-0.169413	0.804781	0.798623	0.76287	0.898955	0.958938	0.680509	0.46771	0.960913	0.953466	0.82552	0.353986	0.74286	0.94928	0.962813	0.957985	0.928592	0.961031	0.986768	0.841966	0.92412	0.808494	0.850306	0.717623	0.702122	0.505902	0.668369	0.974996	0.972237	0.843804	0.895657
ECT	0.823777	0.825301	0.808336	0.774715	0.80582	0.872463	0.887135	0.763094	0.831843	0.821805	0.702226	0.619408	0.636048	1	0.83093	0.699345	0.843375	0.819728	0.241997	0.958519	0.964987	0.925994	0.796421	0.483619	0.750048	0.818651	0.785334	0.594545	0.869057	-0.00593883	0.37216	0.764071	0.747954	0.652945	0.71281	0.597978	0.709592	0.633765	0.505887	0.903166	0.836939	0.856876	0.847284	0.597074	0.593235	0.718665	0.658619	0.912475	0.909413
PL	0.927704	0.933516	0.863485	0.904493	0.919458	0.903687	0.851018	0.840061	0.827236	0.780887	0.828158	0.756559	0.777595	0.83093	1	0.66497	0.727998	0.628207	0.218766	0.895186	0.918687	0.876477	0.920763	0.729875	0.591095	0.836681	0.913146	0.839608	0.990321	-0.0596667	0.261957	0.87297	0.906291	0.871867	0.925666	0.85268	0.766024	0.916551	0.71024	0.97551	0.92791	0.946818	0.779486	0.849354	0.442929	0.872193	0.831782	0.941886	0.897331
PIR	0.77002	0.742132	0.771183	0.723685	0.780369	0.771807	0.83973	0.878393	0.877019	0.916936	0.748821	0.769627	0.825766	0.699345	0.66497	1	0.290982	0.378816	0.269379	0.731591	0.804138	0.815419	0.704723	0.655938	0.963771	0.309626	0.795272	0.66708	0.75627	0.661001	0.796621	0.715585	0.775585	0.712137	0.676543	0.710258	0.839261	0.521773	0.553484	0.684833	0.8876	0.788531	0.924489	0.184784	0.946964	0.777507	0.727134	0.708753	0.845595
ILA	0.541019	0.558987	0.491809	0.493486	0.520161	0.617969	0.544182	0.379363	0.463847	0.438098	0.349413	0.221871	0.231271	0.843375	0.727998	0.290982	1	0.945674	0.388817	0.728715	0.746587	0.724862	0.572252	0.122181	0.382076	0.90351	0.484119	0.309572	0.702134	-0.39744	-0.146281	0.465496	0.454519	0.370375	0.473966	0.292045	0.29572	0.492175	0.17459	0.751918	0.597169	0.736395	0.60161	0.699365	0.153026	0.400106	0.336229	0.699001	0.613742
TT	0.433543	0.449579	0.4387	0.396904	0.450503	0.588305	0.49491	0.332764	0.455811	0.472791	0.261341	0.160453	0.179813	0.819728	0.628207	0.378816	0.945674	1	0.44818	0.65451	0.717659	0.763099	0.511798	-0.00346912	0.48931	0.808643	0.411825	0.21481	0.626341	-0.159417	-0.00972242	0.376893	0.384983	0.291283	0.352183	0.172234	0.26442	0.336202	0.025783	0.66591	0.599369	0.730737	0.694417	0.48029	0.264286	0.339252	0.268293	0.595366	0.585599
MOB	0.0141804	-0.0264654	-0.169427	-0.142716	-0.0677648	-0.0593507	-0.00597441	-0.0266003	-0.0605063	-0.0168264	-0.222817	-0.27259	-0.169413	0.241997	0.218766	0.269379	0.388817	0.44818	1	0.0666536	0.190886	0.178504	-0.119982	-0.27844	0.41084	0.0353821	-0.0571427	-0.243114	0.228413	0.138832	-0.268676	-0.206916	-0.0933454	-0.182578	-0.101135	-0.115583	-0.197035	-0.13221	-0.415487	0.0925615	0.28697	0.418989	0.430883	0.0143492	0.339958	-0.150739	-0.248519	0.0439018	0.0517295
ACB	0.942913	0.946121	0.927245	0.91506	0.926362	0.948286	0.968099	0.889465	0.9228	0.889946	0.868144	0.799367	0.804781	0.958519	0.895186	0.731591	0.728715	0.65451	0.0666536	1	0.981174	0.91889	0.906483	0.705694	0.715671	0.810022	0.913911	0.78085	0.928616	-0.000841081	0.462823	0.908134	0.886525	0.819271	0.868511	0.786119	0.85327	0.797341	0.729679	0.962239	0.879013	0.854449	0.805275	0.690544	0.589885	0.866813	0.826862	0.986809	0.971388
LSr	0.926923	0.927079	0.913154	0.894545	0.924052	0.955472	0.954831	0.891071	0.9293	0.914652	0.839668	0.778182	0.798623	0.964987	0.918687	0.804138	0.746587	0.717659	0.190886	0.981174	1	0.969998	0.908188	0.667461	0.790306	0.798436	0.912532	0.767704	0.955716	0.110852	0.486064	0.881514	0.888107	0.816618	0.853087	0.772031	0.841721	0.775005	0.661911	0.965228	0.94226	0.929245	0.898374	0.649155	0.65439	0.865293	0.814829	0.966918	0.980687
MS	0.852403	0.859177	0.88882	0.847649	0.891121	0.951992	0.900287	0.845469	0.913659	0.921377	0.789177	0.743985	0.76287	0.925994	0.876477	0.815419	0.724862	0.763099	0.178504	0.91889	0.969998	1	0.901906	0.595508	0.79209	0.787293	0.874403	0.741057	0.914971	0.21857	0.538836	0.840413	0.860722	0.79696	0.799009	0.70814	0.814106	0.720477	0.583712	0.926148	0.94172	0.932137	0.932323	0.563006	0.644124	0.843786	0.796149	0.898337	0.953566
BST	0.943342	0.960419	0.977875	0.980125	0.984361	0.984537	0.915319	0.914647	0.934562	0.89683	0.944378	0.907865	0.898955	0.796421	0.920763	0.704723	0.572252	0.511798	-0.119982	0.906483	0.908188	0.901906	1	0.838794	0.585688	0.796769	0.974328	0.945889	0.931024	0.0736348	0.522191	0.977818	0.979419	0.966719	0.964718	0.903121	0.911889	0.93147	0.852301	0.958384	0.898085	0.848811	0.746247	0.740584	0.468948	0.972919	0.961967	0.942033	0.946383
CEA	0.88683	0.8848	0.873811	0.912802	0.888702	0.786569	0.812864	0.907294	0.832252	0.775333	0.95471	0.964325	0.958938	0.483619	0.729875	0.655938	0.122181	-0.00346912	-0.27844	0.705694	0.667461	0.595508	0.838794	1	0.474728	0.412492	0.907163	0.958728	0.752059	0.192919	0.600487	0.912449	0.916889	0.940532	0.926144	0.977545	0.915615	0.880535	0.977802	0.737075	0.727066	0.59244	0.500441	0.582669	0.485083	0.92924	0.944799	0.779344	0.779609
OT	0.680595	0.647041	0.664789	0.601379	0.668654	0.689902	0.789333	0.776674	0.79751	0.850375	0.61186	0.615276	0.680509	0.750048	0.591095	0.963771	0.382076	0.48931	0.41084	0.715671	0.790306	0.79209	0.585688	0.474728	1	0.294539	0.678744	0.487737	0.692251	0.621306	0.714104	0.590819	0.642553	0.54729	0.53524	0.546995	0.719488	0.364954	0.377864	0.625256	0.824778	0.756719	0.933455	0.0991601	0.969047	0.635873	0.566989	0.658134	0.792232
LSc	0.700255	0.735232	0.707814	0.720801	0.721051	0.791938	0.665597	0.548167	0.623057	0.570391	0.599154	0.49103	0.46771	0.818651	0.836681	0.309626	0.90351	0.808643	0.0353821	0.810022	0.798436	0.787293	0.796769	0.412492	0.294539	1	0.684884	0.606045	0.796522	-0.414392	0.0067468	0.707882	0.679012	0.642553	0.710303	0.540249	0.516215	0.752487	0.494345	0.876832	0.668018	0.752772	0.558774	0.860233	0.0768775	0.642638	0.615768	0.821425	0.73085
LAT	0.985046	0.987732	0.983521	0.992838	0.998289	0.966268	0.956396	0.978128	0.964937	0.928479	0.980678	0.95452	0.960913	0.785334	0.913146	0.795272	0.484119	0.411825	-0.0571427	0.913911	0.912532	0.874403	0.974328	0.907163	0.678744	0.684884	1	0.958592	0.940957	0.174771	0.594247	0.985981	0.997045	0.97646	0.980055	0.957725	0.959916	0.91944	0.891801	0.939339	0.924899	0.848733	0.774882	0.683858	0.600853	0.991854	0.974745	0.950203	0.963739
RT	0.918463	0.929717	0.938023	0.966082	0.953442	0.893962	0.84768	0.916882	0.882656	0.831899	0.970474	0.964064	0.953466	0.594545	0.839608	0.66708	0.309572	0.21481	-0.243114	0.78085	0.767704	0.741057	0.945889	0.958728	0.487737	0.606045	0.958592	1	0.847272	0.140372	0.562931	0.96466	0.974971	0.995993	0.976605	0.977019	0.926116	0.950654	0.95097	0.850422	0.818967	0.722816	0.603446	0.689064	0.435757	0.98035	0.990301	0.851329	0.85455
LH	0.95374	0.953971	0.898272	0.92323	0.944822	0.932529	0.905512	0.893473	0.885487	0.850772	0.861057	0.799091	0.82552	0.869057	0.990321	0.75627	0.702134	0.626341	0.228413	0.928616	0.955716	0.914971	0.931024	0.752059	0.692251	0.796522	0.940957	0.847272	1	0.0485659	0.372547	0.895671	0.928925	0.883908	0.928362	0.866933	0.82324	0.890024	0.72309	0.980251	0.963864	0.96222	0.843975	0.777258	0.558809	0.899467	0.854794	0.960663	0.942771
PVT	0.0851925	0.0498953	0.167154	0.0805202	0.146661	0.138078	0.20277	0.325514	0.323425	0.424878	0.181661	0.297941	0.353986	-0.00593883	-0.0596667	0.661001	-0.39744	-0.159417	0.138832	-0.000841081	0.110852	0.21857	0.0736348	0.192919	0.621306	-0.414392	0.174771	0.140372	0.0485659	1	0.778326	0.0946432	0.178894	0.16302	0.0318018	0.158519	0.34927	-0.130431	0.049185	-0.0554344	0.304883	0.1616	0.457233	-0.546637	0.736414	0.216561	0.199749	-0.0386766	0.20207
RE	0.513575	0.499605	0.647622	0.552279	0.580849	0.582996	0.648275	0.708404	0.739223	0.791278	0.653031	0.736199	0.74286	0.37216	0.261957	0.796621	-0.146281	-0.00972242	-0.268676	0.462823	0.486064	0.538836	0.522191	0.600487	0.714104	0.0067468	0.594247	0.562931	0.372547	0.778326	1	0.589725	0.593389	0.576126	0.461829	0.5357	0.782307	0.293065	0.553678	0.362664	0.537971	0.346226	0.585113	-0.164408	0.786839	0.640059	0.645189	0.423141	0.613854
MBO	0.967427	0.978271	0.992049	0.996924	0.989037	0.963975	0.945027	0.952864	0.952147	0.906159	0.98917	0.961757	0.94928	0.764071	0.87297	0.715585	0.465496	0.376893	-0.206916	0.908134	0.881514	0.840413	0.977818	0.912449	0.590819	0.707882	0.985981	0.96466	0.895671	0.0946432	0.589725	1	0.985966	0.974737	0.974942	0.942169	0.959404	0.924513	0.929373	0.924309	0.857548	0.772805	0.690061	0.697794	0.513636	0.98688	0.98334	0.942929	0.94361
ZI	0.971603	0.97729	0.980064	0.991674	0.995427	0.96112	0.933977	0.967715	0.953555	0.91626	0.980738	0.959864	0.962813	0.747954	0.906291	0.775585	0.454519	0.384983	-0.0933454	0.886525	0.888107	0.860722	0.979419	0.916889	0.642553	0.679012	0.997045	0.974971	0.928925	0.178894	0.593389	0.985966	1	0.989494	0.984292	0.964197	0.956306	0.932288	0.90163	0.92785	0.914473	0.83593	0.752088	0.687446	0.565766	0.997129	0.985674	0.930826	0.946567
PVH	0.93744	0.947662	0.957083	0.977984	0.973333	0.926159	0.878247	0.936116	0.912124	0.868186	0.974297	0.963268	0.957985	0.652945	0.871867	0.712137	0.370375	0.291283	-0.182578	0.819271	0.816618	0.79696	0.966719	0.940532	0.54729	0.642553	0.97646	0.995993	0.883908	0.16302	0.576126	0.974737	0.989494	1	0.982755	0.973176	0.938096	0.948803	0.928454	0.884772	0.86412	0.77683	0.669448	0.691402	0.481979	0.991677	0.993509	0.880983	0.89222
TU	0.970863	0.978934	0.949002	0.987039	0.977903	0.925171	0.894772	0.929607	0.895562	0.837306	0.965531	0.930129	0.928592	0.71281	0.925666	0.676543	0.473966	0.352183	-0.101135	0.868511	0.853087	0.799009	0.964718	0.926144	0.53524	0.710303	0.980055	0.976605	0.928362	0.0318018	0.461829	0.974942	0.984292	0.982755	1	0.975856	0.907345	0.977587	0.921098	0.929751	0.8722	0.810752	0.665267	0.7881	0.452365	0.974942	0.967444	0.931517	0.904068
MPN	0.944454	0.942605	0.90989	0.954336	0.943474	0.85624	0.860125	0.938923	0.871978	0.81758	0.96456	0.954077	0.961031	0.597978	0.85268	0.710258	0.292045	0.172234	-0.115583	0.786119	0.772031	0.70814	0.903121	0.977545	0.546995	0.540249	0.957725	0.977019	0.866933	0.158519	0.5357	0.942169	0.964197	0.973176	0.975856	1	0.918306	0.937807	0.94405	0.840985	0.837453	0.740795	0.621989	0.683758	0.514441	0.962869	0.961004	0.859524	0.851488
VLPO	0.927971	0.926162	0.970163	0.949042	0.953633	0.922501	0.948994	0.982273	0.977531	0.958532	0.979994	0.986502	0.986768	0.709592	0.766024	0.839261	0.29572	0.26442	-0.197035	0.85327	0.841721	0.814106	0.911889	0.915615	0.719488	0.516215	0.959916	0.926116	0.82324	0.34927	0.782307	0.959404	0.956306	0.938096	0.907345	0.918306	1	0.807064	0.9005	0.828412	0.850846	0.720022	0.736579	0.478196	0.693488	0.97023	0.964719	0.869241	0.930741
PVi	0.911248	0.92817	0.880132	0.941171	0.92097	0.863273	0.79387	0.831355	0.790737	0.715569	0.900837	0.853274	0.841966	0.633765	0.916551	0.521773	0.492175	0.336202	-0.13221	0.797341	0.775005	0.720477	0.93147	0.880535	0.364954	0.752487	0.91944	0.950654	0.890024	-0.130431	0.293065	0.924513	0.932288	0.948803	0.977587	0.937807	0.807064	1	0.89132	0.900576	0.79531	0.762906	0.546693	0.878355	0.263776	0.917398	0.918429	0.881967	0.815565
SO	0.874931	0.8838	0.886653	0.920364	0.882358	0.798654	0.81041	0.870538	0.818312	0.748774	0.95464	0.951176	0.92412	0.505887	0.71024	0.553484	0.17459	0.025783	-0.415487	0.729679	0.661911	0.583712	0.852301	0.977802	0.377864	0.494345	0.891801	0.95097	0.72309	0.049185	0.553678	0.929373	0.90163	0.928454	0.921098	0.94405	0.9005	0.89132	1	0.748986	0.661527	0.533151	0.421463	0.635522	0.371387	0.916108	0.942154	0.796539	0.771695
LHA	0.950077	0.960899	0.927373	0.941196	0.952275	0.962238	0.918817	0.874393	0.893576	0.851151	0.87363	0.802515	0.808494	0.903166	0.97551	0.684833	0.751918	0.66591	0.0925615	0.962239	0.965228	0.926148	0.958384	0.737075	0.625256	0.876832	0.939339	0.850422	0.980251	-0.0554344	0.362664	0.924309	0.92785	0.884772	0.929751	0.840985	0.828412	0.900576	0.748986	1	0.918306	0.918258	0.793146	0.813025	0.475489	0.902118	0.867154	0.984498	0.95272
LPO	0.911721	0.903887	0.883721	0.881169	0.923616	0.920221	0.900771	0.91438	0.91501	0.912959	0.840453	0.808876	0.850306	0.836939	0.92791	0.8876	0.597169	0.599369	0.28697	0.879013	0.94226	0.94172	0.898085	0.727066	0.824778	0.668018	0.924899	0.818967	0.963864	0.304883	0.537971	0.857548	0.914473	0.86412	0.8722	0.837453	0.850846	0.79531	0.661527	0.918306	1	0.972262	0.938817	0.592765	0.716794	0.894068	0.843686	0.895645	0.944458
MEPO	0.8502	0.846288	0.798478	0.807031	0.854532	0.8702	0.822654	0.808129	0.819409	0.814221	0.729405	0.671995	0.717623	0.856876	0.946818	0.788531	0.736395	0.730737	0.418989	0.854449	0.929245	0.932137	0.848811	0.59244	0.756719	0.752772	0.848733	0.722816	0.96222	0.1616	0.346226	0.772805	0.83593	0.77683	0.810752	0.740795	0.720022	0.762906	0.533151	0.918258	0.972262	1	0.922591	0.662744	0.606615	0.800672	0.738716	0.870495	0.888678
MPO	0.760361	0.744712	0.755506	0.708927	0.77751	0.821355	0.824654	0.802064	0.843499	0.882176	0.669284	0.646024	0.702122	0.847284	0.779486	0.924489	0.60161	0.694417	0.430883	0.805275	0.898374	0.932323	0.746247	0.500441	0.933455	0.558774	0.774882	0.603446	0.843975	0.457233	0.585113	0.690061	0.752088	0.669448	0.665267	0.621989	0.736579	0.546693	0.421463	0.793146	0.938817	0.922591	1	0.346873	0.827012	0.732744	0.663605	0.77223	0.874436
ARH	0.726111	0.751728	0.637887	0.729579	0.698952	0.666386	0.573584	0.539234	0.509919	0.411107	0.627851	0.523338	0.505902	0.597074	0.849354	0.184784	0.699365	0.48029	0.0143492	0.690544	0.649155	0.563006	0.740584	0.582669	0.0991601	0.860233	0.683858	0.689064	0.777258	-0.546637	-0.164408	0.697794	0.687446	0.691402	0.7881	0.683758	0.478196	0.878355	0.635522	0.813025	0.592765	0.662744	0.346873	1	-0.0632369	0.646301	0.63591	0.772485	0.610889
STN	0.599651	0.556983	0.58241	0.518492	0.579521	0.570463	0.71376	0.737019	0.730823	0.788597	0.568953	0.60101	0.668369	0.593235	0.442929	0.946964	0.153026	0.264286	0.339958	0.589885	0.65439	0.644124	0.468948	0.485083	0.969047	0.0768775	0.600853	0.435757	0.558809	0.736414	0.786839	0.513636	0.565766	0.481979	0.452365	0.514441	0.693488	0.263776	0.371387	0.475489	0.716794	0.606615	0.827012	-0.0632369	1	0.571423	0.513337	0.534918	0.689343
MRN	0.958167	0.964492	0.982173	0.987531	0.989447	0.95441	0.928627	0.969115	0.956998	0.922441	0.98747	0.976039	0.974996	0.718665	0.872193	0.777507	0.400106	0.339252	-0.150739	0.866813	0.865293	0.843786	0.972919	0.92924	0.635873	0.642638	0.991854	0.98035	0.899467	0.216561	0.640059	0.98688	0.997129	0.991677	0.974942	0.962869	0.97023	0.917398	0.916108	0.902118	0.894068	0.800672	0.732744	0.646301	0.571423	1	0.994307	0.909764	0.936566
PPN	0.932437	0.94275	0.971965	0.978681	0.972352	0.932114	0.897494	0.947348	0.933708	0.894254	0.987318	0.98307	0.972237	0.658619	0.831782	0.727134	0.336229	0.268293	-0.248519	0.826862	0.814829	0.796149	0.961967	0.944799	0.566989	0.615768	0.974745	0.990301	0.854794	0.199749	0.645189	0.98334	0.985674	0.993509	0.967444	0.961004	0.964719	0.918429	0.942154	0.867154	0.843686	0.738716	0.663605	0.63591	0.513337	0.994307	1	0.876645	0.900992
DR	0.975379	0.980415	0.944792	0.955106	0.959028	0.956659	0.960027	0.909939	0.919745	0.873446	0.907198	0.839459	0.843804	0.912475	0.941886	0.708753	0.699001	0.595366	0.0439018	0.986809	0.966918	0.898337	0.942033	0.779344	0.658134	0.821425	0.950203	0.851329	0.960663	-0.0386766	0.423141	0.942929	0.930826	0.880983	0.931517	0.859524	0.869241	0.881967	0.796539	0.984498	0.895645	0.870495	0.77223	0.772485	0.534918	0.909764	0.876645	1	0.967073
PAG	0.959898	0.960175	0.969647	0.948021	0.969901	0.982184	0.98767	0.955901	0.982568	0.96647	0.921523	0.882654	0.895657	0.909413	0.897331	0.845595	0.613742	0.585599	0.0517295	0.971388	0.980687	0.953566	0.946383	0.779609	0.792232	0.73085	0.963739	0.85455	0.942771	0.20207	0.613854	0.94361	0.946567	0.89222	0.904068	0.851488	0.930741	0.815565	0.771695	0.95272	0.944458	0.888678	0.874436	0.610889	0.689343	0.936566	0.900992	0.967073	1
SNr	0.93215	0.945195	0.97869	0.951162	0.954788	0.98109	0.967706	0.911431	0.959191	0.929185	0.925539	0.881287	0.867196	0.888589	0.848198	0.722825	0.611401	0.560008	-0.149784	0.966865	0.94176	0.912376	0.953437	0.77347	0.660973	0.783438	0.94038	0.857173	0.883703	0.0691824	0.587612	0.960006	0.927357	0.88523	0.894795	0.821018	0.919531	0.824508	0.813692	0.938561	0.850508	0.789552	0.756874	0.644447	0.551769	0.924318	0.906806	0.959991	0.971289
APN	0.803553	0.824292	0.932905	0.868774	0.886436	0.944294	0.875894	0.844589	0.928561	0.93102	0.859021	0.851865	0.830852	0.773863	0.722897	0.732201	0.476037	0.52085	-0.250875	0.839366	0.848813	0.900274	0.913571	0.695732	0.646088	0.685169	0.868228	0.817058	0.768463	0.268992	0.722207	0.892421	0.87174	0.847574	0.796509	0.728605	0.893741	0.715852	0.728665	0.827987	0.801164	0.719124	0.753331	0.454263	0.547782	0.88545	0.880703	0.822836	0.903318
RR	0.744605	0.763829	0.822239	0.825641	0.842149	0.825401	0.686032	0.780905	0.784309	0.772736	0.812846	0.830119	0.827882	0.483783	0.761853	0.653273	0.278635	0.296961	-0.152106	0.616512	0.674395	0.750808	0.879369	0.778473	0.463669	0.560156	0.840835	0.900586	0.762745	0.307665	0.55863	0.824128	0.876216	0.91055	0.841857	0.828394	0.799638	0.82807	0.741697	0.748263	0.803217	0.735293	0.648028	0.545616	0.386234	0.884172	0.891913	0.685071	0.750358
EW	0.816274	0.828363	0.819133	0.81166	0.853857	0.904494	0.80363	0.763529	0.814614	0.808427	0.721028	0.659051	0.682107	0.869244	0.932139	0.704709	0.792716	0.801662	0.276434	0.858499	0.92566	0.960555	0.887002	0.549046	0.665851	0.85387	0.835624	0.727689	0.93633	0.0783892	0.331994	0.789059	0.831057	0.781781	0.80181	0.695264	0.706432	0.773099	0.529283	0.933254	0.931903	0.969718	0.880936	0.694107	0.486215	0.800539	0.750822	0.868404	0.8847
VTA	0.744123	0.759174	0.821921	0.754399	0.798398	0.901398	0.833716	0.735106	0.846388	0.863914	0.688065	0.637806	0.642463	0.924206	0.773036	0.719644	0.761377	0.829414	0.112265	0.877542	0.920879	0.972429	0.831641	0.449824	0.729996	0.803348	0.770754	0.622221	0.813206	0.163634	0.508138	0.758524	0.754803	0.683529	0.68028	0.558137	0.726128	0.602062	0.471872	0.85948	0.837983	0.842234	0.874312	0.484328	0.565604	0.741207	0.696547	0.829778	0.890784
PCG	0.839871	0.827304	0.847273	0.854983	0.869474	0.790025	0.80445	0.926027	0.867269	0.857631	0.901353	0.938724	0.963474	0.491962	0.713241	0.847676	0.0889714	0.076511	-0.0692183	0.662246	0.694512	0.687471	0.813457	0.922256	0.680842	0.312591	0.891996	0.908408	0.762028	0.511413	0.750602	0.850262	0.903195	0.911657	0.859302	0.927915	0.921145	0.772236	0.839676	0.701123	0.833107	0.69571	0.695567	0.392475	0.694925	0.917333	0.912932	0.717057	0.801239
TRN	0.798166	0.795573	0.878065	0.847674	0.860251	0.81948	0.817701	0.910799	0.898766	0.901441	0.905526	0.953847	0.957385	0.508603	0.631464	0.832561	0.0678855	0.0971889	-0.250113	0.669054	0.688751	0.71293	0.824343	0.884749	0.671483	0.324968	0.873339	0.891088	0.693454	0.548847	0.867539	0.863438	0.886786	0.895645	0.815193	0.865307	0.950928	0.712088	0.838265	0.674543	0.779694	0.62074	0.676681	0.298374	0.684649	0.91487	0.922828	0.697397	0.811171
PB	0.950092	0.951513	0.95235	0.970866	0.954169	0.887855	0.911727	0.958414	0.918663	0.867416	0.994693	0.986358	0.978528	0.647828	0.801408	0.716009	0.287978	0.177548	-0.246714	0.833331	0.794271	0.726775	0.913202	0.976977	0.569626	0.54803	0.963342	0.968113	0.831636	0.162304	0.631316	0.973674	0.963908	0.964282	0.959767	0.974355	0.965946	0.899846	0.974506	0.838862	0.801889	0.682596	0.610395	0.625913	0.544325	0.971785	0.976239	0.881634	0.884643
LDT	0.94363	0.958814	0.986986	0.989597	0.98271	0.962254	0.917035	0.935607	0.94076	0.897833	0.98107	0.960388	0.944101	0.728269	0.862639	0.698855	0.44222	0.368049	-0.242102	0.876093	0.857829	0.837651	0.984613	0.907095	0.558134	0.707921	0.978138	0.975571	0.880467	0.112721	0.596136	0.994801	0.985344	0.984254	0.970821	0.936345	0.951592	0.928711	0.924223	0.911097	0.849917	0.764908	0.677581	0.690227	0.477738	0.98913	0.991049	0.916625	0.926
LC	0.828531	0.810301	0.808469	0.758764	0.799708	0.834698	0.924081	0.846043	0.885768	0.898432	0.739342	0.696834	0.733021	0.932775	0.739196	0.872755	0.615306	0.631654	0.264736	0.91468	0.931582	0.885121	0.738204	0.56072	0.917378	0.573795	0.796098	0.59676	0.81811	0.294048	0.60548	0.752339	0.75302	0.652187	0.6839	0.637932	0.79608	0.544939	0.534996	0.81196	0.855457	0.810822	0.902494	0.375536	0.834948	0.737917	0.67555	0.857983	0.915711
CS	0.454523	0.482268	0.675797	0.587243	0.577677	0.620266	0.556944	0.575758	0.659607	0.672431	0.652995	0.711626	0.654251	0.316611	0.256712	0.455117	-0.0437755	0.0374709	-0.683421	0.44066	0.412797	0.496525	0.61136	0.575449	0.321004	0.268248	0.565557	0.626352	0.310718	0.377299	0.805926	0.644943	0.590037	0.619903	0.499267	0.494456	0.715215	0.421219	0.636967	0.400519	0.378207	0.218293	0.331503	0.0681388	0.329637	0.642876	0.690715	0.42441	0.546115
PRNr	0.601318	0.632731	0.796359	0.728235	0.71864	0.756666	0.668771	0.682757	0.759867	0.756591	0.766126	0.801396	0.747256	0.449681	0.450074	0.511522	0.125825	0.171178	-0.613688	0.581002	0.557432	0.629671	0.761483	0.675528	0.36471	0.452251	0.703687	0.757408	0.488172	0.281694	0.754526	0.774952	0.728631	0.755815	0.656875	0.628527	0.799289	0.597948	0.737147	0.575302	0.524613	0.389429	0.435951	0.276843	0.332505	0.769357	0.809166	0.58219	0.674069
NTS	0.592536	0.546082	0.448003	0.508503	0.529724	0.381659	0.503901	0.661649	0.512383	0.503547	0.562537	0.596365	0.670566	0.226864	0.496922	0.69986	-0.0948865	-0.14986	0.340267	0.361971	0.409446	0.328951	0.404448	0.683559	0.596981	-0.0569236	0.576351	0.561772	0.541969	0.496131	0.436875	0.470436	0.568795	0.560318	0.564202	0.701077	0.572721	0.481904	0.524503	0.390986	0.615288	0.516401	0.509466	0.207767	0.675051	0.562279	0.530623	0.428649	0.474576
SLD	0.150789	0.10327	-0.123	-0.0238126	-0.0325238	-0.146424	0.0565088	0.0477219	-0.0916642	-0.140305	-0.040234	-0.104952	-0.0408824	0.104155	0.150082	0.0365173	0.134592	-0.0539293	0.573309	0.100519	0.0647209	-0.138487	-0.155674	0.045816	0.129966	-0.0881088	-0.0029029	-0.111039	0.146726	-0.245545	-0.358506	-0.0791019	-0.0522412	-0.110917	0.0374647	0.0906596	-0.102352	0.0303712	-0.0235999	0.0503438	0.056635	0.108364	0.0130067	0.203934	0.162634	-0.0987188	-0.153662	0.121388	-0.00766959
[truncated: 14 more columns]
