# Supplementary material for: Comparative brain-wide mapping of ketamine- and isoflurane-activated nuclei and functional networks in the mouse brain
Source: eLife. 2024 Mar 21;12:RP88420. doi: 10.7554/eLife.88420 (PMC10957177; doi:10.7554/eLife.88420)
Supplement: Figure 7—source data 2. [file elife-88420-fig7-data2.xlsx]

## Sheet: Sheet1
Figure 7—source data 1. Network centrality metrics for brain regions under home cage, ISO, saline, and KET conditions: degree, betweenness, and eigenvector centralities.
	Home cage			ISO			Saline			Ket
	degree	betweenness centrality	eigenvector centrality	degree	betweenness centrality	eigenvector centrality	degree	betweenness centrality	eigenvector centrality	degree	betweenness centrality	eigenvector centrality
ACA	5	0.0790874	0.0316407	0	0	0	12	0.00238195	0.298416	43	0.0166113	0.170675
AI	5	0.0506657	0.0452376	17	0.120355	0.241682	7	0.056055	0.127258	43	0.0189006	0.167206
AUD	7	0.0276854	0.0873234	7	0.041268	0.0284067	2	0	1.08173e-17	44	0.0292671	0.165952
CA	10	0.00750257	0.1811	13	0.0705369	0.223687	3	0.00528821	0	42	0.00895893	0.169677
COA	6	0.0218502	0.0448877	15	0.0853012	0.224652	1	0	0.00422526	40	0.00650512	0.163477
DG	9	0.0699918	0.148237	17	0.0310986	0.291745	2	0	5.69795e-18	42	0.0159967	0.16544
ECT	13	0.0794352	0.170582	9	0.0381503	0.102047	2	0	5.14837e-18	22	0.0527355	0.0686367
ENT	18	0.0949626	0.294518	2	0	0.00384608	4	0.00370175	6.38094e-18	42	0.0229247	0.158498
ILA	3	0	0.034544	10	0.0768939	0.073374	12	0.00446127	0.293916	3	0.00314324	0.0020339
MO	2	0.00897393	0.00281785	8	0.0431055	0.0924709	9	0.000909778	0.224842	44	0.0153006	0.173893
MOB	1	0	0.000277485	16	0.0535962	0.257896	11	0.00326303	0.265757	0	0	0
ORB	13	0.0616734	0.184111	14	0.0525189	0.201198	12	0.00238195	0.306348	43	0.0152862	0.169161
PIR	11	0.055945	0.150166	7	0.0236411	0.0390093	3	0.0200952	0.0441529	14	0.025465	0.0391659
PL	2	0.000528821	0.00111476	9	0.0329614	0.108128	13	0.0119712	0.312317	36	0.0485073	0.131298
RSP	11	0.0288192	0.188066	17	0.118928	0.233146	5	0.0107527	5.21073e-19	35	0.00389914	0.142393
SS	9	0.0511868	0.0738478	6	0.0510437	0.0377278	0	0	2.69361e-27	38	0.0105166	0.149991
TEa	12	0.0371346	0.200302	11	0.11987	0.122626	5	0.00616958	1.32527e-18	44	0.0341685	0.165625
TT	8	0.102922	0.107363	6	0.0281483	0.0213958	9	0.0010312	0.226113	2	0.000806871	0.00158381
VIS	19	0.0788764	0.316502	12	0.00924723	0.216649	5	0.0123392	5.16953e-18	42	0.0500144	0.151909
ACB	14	0.0450857	0.234843	16	0.136763	0.264363	5	0	0.12518	36	0.0104126	0.136308
BST	14	0.0816561	0.230279	7	0.0078739	0.110152	1	0	0.011218	44	0.0212279	0.169594
CEA	1	0	0.00394812	13	0.0446729	0.225007	1	0	0.0241085	27	0.000823543	0.109924
LSc	12	0.0640864	0.188541	5	0.0166912	0.0444364	11	0.0272024	0.257826	6	0.0100913	0.0126518
LSr	5	0	0.0867569	7	0.00616151	0.103221	14	0.0195686	0.326991	35	0.0118663	0.130432
OT	0	0	0	1	0	0.00600087	0	0	0	6	0.00172889	0.0109372
MS	0	0	0	5	0.0494256	0.0576041	11	0.00377829	0.274691	32	0.0095331	0.115666
LAT	8	0.0730822	0.106145	0	0	0	1	0	0	44	0.0153006	0.173783
LH	14	0.034534	0.243806	0	0	0	0	0	0	39	0.0116379	0.149504
PVT	6	0.0189002	0.061894	10	0.0133859	0.140944	9	0.00436403	0.214898	0	0	0
RE	14	0.0925699	0.229591	9	0.0556467	0.122618	10	0.0145106	0.235106	1	0	0.0025254
RT	16	0.0968505	0.23415	8	0.0280594	0.0729635	2	0.00317292	0	37	0.00495569	0.149172
ARH	2	0.0486515	0.00876233	0	0	0	0	0	0	3	0.000401451	0.0065513
LHA	17	0.0386169	0.295984	15	0.0261003	0.262738	0	0	0	40	0.0283848	0.150852
LPO	4	0.0951877	0.0457812	12	0.0611648	0.183803	0	0	0	41	0.0419	0.143713
MBO	3	0.000858832	0.0134098	8	0.00424755	0.124852	4	0.0230918	2.80708e-19	42	0.00895893	0.169118
MEPO	2	0.0486515	0.0035788	3	0.0161079	0.0111395	12	0.026862	0.275441	21	0.00264489	0.0729197
MPN	0	0	1.57772e-30	3	0	0.00687937	1	0	3.08149e-33	37	0.00513209	0.14775
MPO	0	0	0	6	0.000442065	0.108499	1	0	0.00106533	17	0.0225294	0.0433937
PVH	4	0.0036528	0.0154719	6	0.066912	0.0564547	2	0.0200952	0.0120433	39	0.00650495	0.15774
PVi	0	0	0	12	0.0318235	0.181595	1	0	3.27385e-17	31	0.0253207	0.120336
SO	1	0	2.01662e-17	0	0	0	0	0	5.63187e-17	26	0.00073833	0.105041
STN	1	0	0.00408818	9	0.137443	0.0822697	1	0	5.18286e-17	4	0	0.00373923
TU	12	0.064839	0.170785	0	0	0	0	0	1.83876e-17	39	0.00485542	0.158868
VLPO	0	0	0	1	0	0.00428392	0	0	1.42917e-16	39	0.00925643	0.155876
ZI	7	0.0573012	0.0724345	3	0.00518582	0.0109259	1	0	1.24098e-17	44	0.0153006	0.17328
APN	11	0.0374337	0.188482	2	0.00687467	0.00118473	3	0.0179799	9.99746e-27	31	0.070384	0.116987
DR	2	0.0680529	0.0196057	0	0	0	0	0	0	43	0.0381509	0.160272
EW	1	0	0.000670511	1	0	1.63791e-18	1	0	1.24459e-17	21	0.00949062	0.0693951
PAG	15	0.128534	0.26179	1	0	0.0008286	0	0	0	43	0.0250741	0.161771
RR	1	0	0.000196908	0	0	0	0	0	1.26902e-41	20	0.000603479	0.0760387
SNr	0	0	0	0	0	8.47033e-22	1	0	0	41	0.0150997	0.158282
VTA	3	0.0386199	0.0105222	1	0	0.00681307	1	0	0	21	0.059825	0.0641667
MRN	1	0	0	0	0	0	0	0	0	42	0.00895893	0.169441
PPN	3	0	0.031052	5	0.0786819	0.0099363	0	0	0	40	0.00713851	0.161335
CS	5	0.049321	0.0523189	0	0	0	1	0	1.2326e-32	1	0	0.000152835
LC	0	0	0	19	0.0591557	0.304189	3	0.00317292	0	19	0.0276911	0.0558312
NTS	2	0.0250195	0.0124977	3	0.0259463	0.00522438	1	0	1.94865e-17	0	0	0
PB	1	0	2.08167e-17	1	0	5.55112e-17	1	0	0	36	0.00366575	0.148648
PCG	0	0	0	11	0.0078781	0.193351	0	0	0	29	0.0054692	0.10948
SLD	3	0.0497091	0.00264433	0	0	1.11022e-16	0	0	0	0	0	0
TRN	2	0.00105764	0	1	0	2.77556e-17	0	0	0	29	0.11381	0.101353
LDT	0	0	0	1	0	1.38778e-17	0	0	3.32595e-17	42	0.00895893	0.168001
PRNr	1	0	0	3	0.00352547	0.00458107	1	0	0	3	0.0602856	0.00545554
